# Supplementary material for: Domestication of Local Microbial Consortia for Efficient Recovery of Gold Through Top-Down Selection in Airlift Bioreactors
Source: Front Microbiol. 2019 Jan 30;10:60. doi: 10.3389/fmicb.2019.00060 (PMC6363673; doi:10.3389/fmicb.2019.00060)
Supplement: Supplementary file 5 [file Table_5.XLSX]

## Sheet: S5
	Supplementary Table 5. Protein conservation (identity levels) between sequence A. ferrooxidans strains
	Gene Nº	Function	% Identity YQH-1	% Identity Hel18	% Identity Wenelen	% Identity ATCC 23270(T)	% Identity ATCC 53993	% Identity GGI-221	% Identity DLC-5	Category
	1	DNA polymerase III beta subunit (EC 2.7.7.7)	100	100	100	100	100	100	100	CORE
	2	DNA recombination and repair protein RecF	100	100	100	100	100	100	100	CORE
	3	DNA gyrase subunit B (EC 5.99.1.3)	100	100	100	100	100	100	100	CORE
	5	Sigma-fimbriae tip adhesin	100	100	100	100	100	100	100	CORE
	8	Sigma-fimbriae tip adhesin	100	100	100	100	100	100	100	CORE
	12	Cell division topological specificity factor MinE	100	100	100	100	100	100	100	CORE
	17	Protein of unknown function Smg	100	100	100	100	100	100	100	CORE
	18	Rossmann fold nucleotide-binding protein Smf possibly involved in DNA uptake	100	100	100	100	100	100	100	CORE
	19	Uncharacterized protein with LysM domain, COG1652	100	100	100	100	100	100	100	CORE
	20	Peptide deformylase (EC 3.5.1.88)	100	100	100	100	100	100	100	CORE
	25	two component transcriptional regulator, Fis family	100	100	100	100	100	100	100	CORE
	27	hypothetical protein	100	100	100	100	100	100	100	CORE
	33	Inner membrane protein translocase and chaperone YidC, long form	100	100	100	100	100	100	100	CORE
	37	Energy-dependent translational throttle protein EttA	100	100	100	100	100	100	100	CORE
	46	Rhodanese domain protein	100	100	100	100	100	100	100	CORE
	50	Molybdenum ABC transporter, substrate-binding protein ModA	100	100	100	100	100	100	100	CORE
	51	hypothetical protein	100	100	100	100	100	100	100	CORE
	52	hypothetical protein	100	100	100	100	100	100	100	CORE
	54	conserved hypothetical protein, membrane	100	100	100	100	100	100	100	CORE
	55	UPF0056 inner membrane protein YchE	100	100	100	100	100	100	100	CORE
	58	Quinolinate synthetase (EC 2.5.1.72)	100	100	100	100	100	100	100	CORE
	60	Probable transcriptional regulatory protein YebC	100	100	100	100	100	100	100	CORE
	62	Holliday junction ATP-dependent DNA helicase RuvA (EC 3.6.4.12)	100	100	100	100	100	100	100	CORE
	64	Tol-Pal system-associated acyl-CoA thioesterase	100	100	100	100	100	100	100	CORE
	65	Tol-Pal system protein TolQ	100	100	100	100	100	100	100	CORE
	66	Tol biopolymer transport system, TolR protein	100	100	100	100	100	100	100	CORE
	68	Tol-Pal system beta propeller repeat protein TolB	100	100	100	100	100	100	100	CORE
	72	Tol-Pal system peptidoglycan-associated lipoprotein PAL	100	100	100	100	100	100	100	CORE
	74	hypothetical protein	100	100	100	100	100	100	100	CORE
	76	hypothetical protein	100	100	100	100	100	100	100	CORE
	79	Lead, cadmium, zinc and mercury transporting ATPase (EC 3.6.3.3) (EC 3.6.3.5); Copper-translocating P-type ATPase (EC 3.6.3.4)	100	100	100	100	100	100	100	CORE
	81	Glycosyl transferase, group 2 family	100	100	100	100	100	100	100	CORE
	83	Glycosyl transferase, group 1 family protein	100	100	100	100	100	100	100	CORE
	88	Prevent-host-death family protein	100	100	100	100	100	100	100	CORE
	89	hypothetical protein	100	100	100	100	100	100	100	CORE
	90	hypothetical protein	100	100	100	100	100	100	100	CORE
	91	Toxin HigB	100	100	100	100	100	100	100	CORE
	93	hypothetical protein	100	100	100	100	100	100	100	CORE
	94	hypothetical protein	100	100	100	100	100	100	100	CORE
	96	PilT protein domain protein	100	100	100	100	100	100	100	CORE
	101	hypothetical protein	100	100	100	100	100	100	100	CORE
	104	hypothetical protein	100	100	100	100	100	100	100	CORE
	106	ABC-type antimicrobial peptide transport system, permease component	100	100	100	100	100	100	100	CORE
	107	hypothetical protein	100	100	100	100	100	100	100	CORE
	111	Efflux transport system, outer membrane factor (OMF) lipoprotein	100	100	100	100	100	100	100	CORE
	120	hypothetical protein	100	100	100	100	100	100	100	CORE
	121	hypothetical protein	100	100	100	100	100	100	100	CORE
	127	N(6)-L-threonylcarbamoyladenine synthase (EC 2.3.1.234)	100	100	100	100	100	100	100	CORE
	128	hypothetical protein	100	100	100	100	100	100	100	CORE
	86	Glycosyl transferase, family 2?	100	100	100	100	100	99.59	100	CORE
	69	7-cyano-7-deazaguanine synthase (EC 6.3.4.20)	100	100	100	100	100	99.24	100	CORE
	118	hypothetical protein	100	100	100	100	100	99.11	100	CORE
	123	Transcriptional regulator, Crp/Fnr family	100	100	100	100	100	98.72	100	CORE
	34	Membrane protein insertion efficiency factor YidD	100	100	100	100	100	98.55	100	CORE
	42	C4-dicarboxylate transporter/malic acid transport protein	100	100	100	100	100	98.53	100	CORE
	67	TolA protein	100	100	100	100	100	98	100	CORE
	98	Prevent-host-death family protein	100	100	100	100	100	97.87	100	CORE
	77	Transcriptional regulator, MarR family	100	100	100	100	100	92.17	100	CORE
	105	ABC-type antimicrobial peptide transport system, ATPase component	100	100	100	100	100	91.95	100	CORE
	57	Aspartyl-tRNA synthetase (EC 6.1.1.12) @ Aspartyl-tRNA(Asn) synthetase (EC 6.1.1.23)	100	100	100	100	100	100	99.81	CORE
	112	Probable Co/Zn/Cd efflux system membrane fusion protein	100	100	100	100	100	100	99.33	CORE
	70	7-carboxy-7-deazaguanine synthase (EC 4.3.99.3)	100	100	100	100	100	100	99.32	CORE
	21	Methionyl-tRNA formyltransferase (EC 2.1.2.9)	100	100	100	100	100	100	99.28	CORE
	103	hypothetical protein	100	100	100	100	100	100	99.11	CORE
	35	Ribonuclease P protein component (EC 3.1.26.5)	100	100	100	100	100	100	98.72	CORE
	45	DoxD-like family protein	100	100	100	100	100	100	98.53	CORE
	99	Proto-chlorophyllide reductase 57 kD subunit	100	100	100	100	100	100	96.49	CORE
	71	Cell division coordinator CpoB	100	100	100	100	100	99.59	99.02	CORE
	59	Acyl-CoA:1-acyl-sn-glycerol-3-phosphate acyltransferase (EC 2.3.1.51)	100	100	100	100	100	99.49	99.49	CORE
	129	Acyl-phosphate:glycerol-3-phosphate O-acyltransferase PlsY (EC 2.3.1.n3)	100	100	100	100	100	99.43	97.83	CORE
	32	tRNA-5-carboxymethylaminomethyl-2-thiouridine(34) synthesis protein MnmE	100	100	100	100	100	98.68	98.68	CORE
	9	Cell division topological specificity factor MinE	100	100	100	100	100	97.22	97.22	CORE
	214	Cinnamyl alcohol dehydrogenase/reductase (EC 1.1.1.195) @ Alcohol dehydrogenase (EC 1.1.1.1)	100	100	100	100	100	100	100	CORE
	220	FIG00899427: hypothetical protein	100	100	100	100	100	100	100	CORE
	229	Outer membrane factor (OMF) lipoprotein associated wth EmrAB-OMF efflux system	100	100	100	100	100	100	100	CORE
	232	hypothetical protein	100	100	100	100	100	100	100	CORE
	233	hypothetical protein	100	100	100	100	100	100	100	CORE
	247	Transcriptional regulator, LysR family	100	100	100	100	100	100	100	CORE
	248	Short-chain dehydrogenase/reductase SDR?	100	100	100	100	100	100	100	CORE
	249	anti-ECFsigma factor, ChrR	100	100	100	100	100	100	100	CORE
	253	Shufflon-specific DNA recombinase	100	100	100	100	100	100	100	CORE
	256	RelB/StbD replicon stabilization protein (antitoxin to RelE/StbE)	100	100	100	100	100	100	100	CORE
	269	Cytidylate kinase (EC 2.7.4.25)	100	100	100	100	100	100	100	CORE
	270	SSU ribosomal protein S1p	100	100	100	100	100	100	100	CORE
	271	Integration host factor beta subunit	100	100	100	100	100	100	100	CORE
	273	Orotidine 5'-phosphate decarboxylase (EC 4.1.1.23)	100	100	100	100	100	100	100	CORE
	275	Cell division trigger factor (EC 5.2.1.8)	100	100	100	100	100	100	100	CORE
	278	ATP-dependent protease La (EC 3.4.21.53) Type I	100	100	100	100	100	100	100	CORE
	284	hypothetical protein	100	100	100	100	100	100	100	CORE
	297	Alanyl-tRNA synthetase (EC 6.1.1.7)	100	100	100	100	100	100	100	CORE
	298	hypothetical protein	100	100	100	100	100	100	100	CORE
	300	Sulfhydrogenase subunit alpha (EC 1.12.1.5)	100	100	100	100	100	100	100	CORE
	301	Sulfhydrogenase subunit delta (EC 1.12.1.5)	100	100	100	100	100	100	100	CORE
	305	hypothetical protein	100	100	100	100	100	100	100	CORE
	313	Oxidoreductase, GMC family	100	100	100	100	100	100	100	CORE
	328	hypothetical protein	100	100	100	100	100	100	100	CORE
	331	Type IV fimbrial biogenesis protein PilX	100	100	100	100	100	100	100	CORE
	332	Type IV fimbrial biogenesis protein PilW	100	100	100	100	100	100	100	CORE
	338	Molybdopterin synthase catalytic subunit MoaE (EC 2.8.1.12)	100	100	100	100	100	100	100	CORE
	339	UPF0234 protein Yitk	100	100	100	100	100	100	100	CORE
	340	Roadblock/LC7 family protein	100	100	100	100	100	100	100	CORE
	342	Glycine cleavage system H protein	100	100	100	100	100	100	100	CORE
	343	Glycine dehydrogenase [decarboxylating] (glycine cleavage system P1 protein) (EC 1.4.4.2)	100	100	100	100	100	100	100	CORE
	347	Alkyl hydroperoxide reductase subunit C-like protein	100	100	100	100	100	100	100	CORE
	350	hypothetical protein	100	100	100	100	100	100	100	CORE
	354	Uncharacterized metal-dependent hydrolase YcfH	100	100	100	100	100	100	100	CORE
	356	Uncharacterized metal-dependent hydrolase YcfH	100	100	100	100	100	100	100	CORE
	426	DNA-binding protein HBsu	100	100	100	100	100	100	100	CORE
	489	hypothetical protein	100	100	100	100	100	100	100	CORE
	590	hypothetical protein	100	100	100	100	100	100	100	CORE
	596	Transcriptional activator MetR	100	100	100	100	100	100	100	CORE
	599	protein of unknown function DUF155	100	100	100	100	100	100	100	CORE
	602	Predicted endonuclease distantly related to archaeal Holliday junction resolvase	100	100	100	100	100	100	100	CORE
	604	16S rRNA (cytidine(1402)-2'-O)-methyltransferase (EC 2.1.1.198)	100	100	100	100	100	100	100	CORE
	606	hypothetical protein	100	100	100	100	100	100	100	CORE
	614	Fructose-1,6-bisphosphatase, Mycobacterial type SUP1 (EC 3.1.3.11); Sugar phosphatase SUP1 (EC 3.1.3.23)	100	100	100	100	100	100	100	CORE
	615	Spermidine synthase (EC 2.5.1.16)	100	100	100	100	100	100	100	CORE
	616	S-adenosylmethionine decarboxylase proenzyme (EC 4.1.1.50), prokaryotic class 1B	100	100	100	100	100	100	100	CORE
	617	Phospholipid ABC transporter ATP-binding protein MlaF	100	100	100	100	100	100	100	CORE
	624	4-hydroxythreonine-4-phosphate dehydrogenase (EC 1.1.1.262)	100	100	100	100	100	100	100	CORE
	629	Arginyl-tRNA synthetase (EC 6.1.1.19)	100	100	100	100	100	100	100	CORE
	634	hypothetical protein	100	100	100	100	100	100	100	CORE
	635	23S rRNA (adenine(2030)-N(6))-methyltransferase (EC 2.1.1.266)	100	100	100	100	100	100	100	CORE
	639	FKBP-type peptidyl-prolyl cis-trans isomerase SlyD (EC 5.2.1.8)	100	100	100	100	100	100	100	CORE
	641	Shikimate 5-dehydrogenase I alpha (EC 1.1.1.25)	100	100	100	100	100	100	100	CORE
	647	Dephospho-CoA kinase (EC 2.7.1.24)	100	100	100	100	100	100	100	CORE
	649	Fructose-1,6-bisphosphatase, type I (EC 3.1.3.11)	100	100	100	100	100	100	100	CORE
	650	Stringent starvation protein B	100	100	100	100	100	100	100	CORE
	655	Biotin carboxylase of acetyl-CoA carboxylase (EC 6.3.4.14)	100	100	100	100	100	100	100	CORE
	659	hypothetical protein	100	100	100	100	100	100	100	CORE
	661	Cell division protein FtsA	100	100	100	100	100	100	100	CORE
	664	UDP-N-acetylenolpyruvoylglucosamine reductase (EC 1.3.1.98)	100	100	100	100	100	100	100	CORE
	665	UDP-N-acetylmuramate--L-alanine ligase (EC 6.3.2.8)	100	100	100	100	100	100	100	CORE
	666	UDP-N-acetylglucosamine--N-acetylmuramyl-(pentapeptide) pyrophosphoryl-undecaprenol N-acetylglucosamine transferase (EC 2.4.1.227)	100	100	100	100	100	100	100	CORE
	667	Cell division protein FtsW	100	100	100	100	100	100	100	CORE
	668	UDP-N-acetylmuramoylalanine--D-glutamate ligase (EC 6.3.2.9)	100	100	100	100	100	100	100	CORE
	669	Phospho-N-acetylmuramoyl-pentapeptide-transferase (EC 2.7.8.13)	100	100	100	100	100	100	100	CORE
	671	UDP-N-acetylmuramoylalanyl-D-glutamate--2,6-diaminopimelate ligase (EC 6.3.2.13)	100	100	100	100	100	100	100	CORE
	674	16S rRNA (cytosine(1402)-N(4))-methyltransferase (EC 2.1.1.199)	100	100	100	100	100	100	100	CORE
	678	CCA tRNA nucleotidyltransferase (EC 2.7.7.72)	100	100	100	100	100	100	100	CORE
	680	Stringent starvation protein A	100	100	100	100	100	100	100	CORE
	684	Mutator MutT protein (7,8-dihydro-8-oxoguanine-triphosphatase) (EC 3.6.1.-) / Thiazole tautomerase TenI-like domain	100	100	100	100	100	100	100	CORE
	686	Polysaccharide deacetylase	100	100	100	100	100	100	100	CORE
	690	O-antigen polymerase	100	100	100	100	100	100	100	CORE
	692	Glycosyl transferase, family 2:TPR repeat	100	100	100	100	100	100	100	CORE
	696	Lipid A biosynthesis lauroyl acyltransferase (EC 2.3.1.241)	100	100	100	100	100	100	100	CORE
	697	Cystathionine beta-lyase (EC 4.4.1.8)	100	100	100	100	100	100	100	CORE
	704	Dethiobiotin synthetase (EC 6.3.3.3)	100	100	100	100	100	100	100	CORE
	705	Protease HtpX	100	100	100	100	100	100	100	CORE
	708	Probable iron export permease protein FetB	100	100	100	100	100	100	100	CORE
	716	Membrane fusion component of MSF-type tripartite multidrug efflux system	100	100	100	100	100	100	100	CORE
	717	hypothetical protein	100	100	100	100	100	100	100	CORE
	719	Biotin synthase (EC 2.8.1.6)	100	100	100	100	100	100	100	CORE
	721	Cell division integral membrane protein, YggT and half-length relatives	100	100	100	100	100	100	100	CORE
	722	Pyrroline-5-carboxylate reductase (EC 1.5.1.2)	100	100	100	100	100	100	100	CORE
	723	UPF0001 protein YggS	100	100	100	100	100	100	100	CORE
	727	Sulfide:quinone oxidoreductase, Type VI	100	100	100	100	100	100	100	CORE
	729	hypothetical protein	100	100	100	100	100	100	100	CORE
	732	tRNA (guanine(46)-N(7))-methyltransferase (EC 2.1.1.33)	100	100	100	100	100	100	100	CORE
	739	phospholipase	100	100	100	100	100	100	100	CORE
	744	GTP-binding protein Obg	100	100	100	100	100	100	100	CORE
	745	LSU ribosomal protein L27p	100	100	100	100	100	100	100	CORE
	746	LSU ribosomal protein L21p	100	100	100	100	100	100	100	CORE
	747	Na(+)-dependent bicarbonate transporter BicA	100	100	100	100	100	100	100	CORE
	750	hypothetical protein	100	100	100	100	100	100	100	CORE
	753	Methionine biosynthesis protein MetW	100	100	100	100	100	100	100	CORE
	755	hypothetical protein	100	100	100	100	100	100	100	CORE
	756	Serine hydroxymethyltransferase (EC 2.1.2.1)	100	100	100	100	100	100	100	CORE
	759	Riboflavin synthase eubacterial/eukaryotic (EC 2.5.1.9)	100	100	100	100	100	100	100	CORE
	761	6,7-dimethyl-8-ribityllumazine synthase (EC 2.5.1.78)	100	100	100	100	100	100	100	CORE
	763	hypothetical protein	100	100	100	100	100	100	100	CORE
	769	Protein translocase subunit SecE	100	100	100	100	100	100	100	CORE
	778	SSU ribosomal protein S7p (S5e)	100	100	100	100	100	100	100	CORE
	781	SSU ribosomal protein S10p (S20e)	100	100	100	100	100	100	100	CORE
	782	LSU ribosomal protein L3p (L3e)	100	100	100	100	100	100	100	CORE
	783	LSU ribosomal protein L4p (L1e)	100	100	100	100	100	100	100	CORE
	784	LSU ribosomal protein L23p (L23Ae)	100	100	100	100	100	100	100	CORE
	786	SSU ribosomal protein S19p (S15e)	100	100	100	100	100	100	100	CORE
	793	LSU ribosomal protein L24p (L26e)	100	100	100	100	100	100	100	CORE
	794	LSU ribosomal protein L5p (L11e)	100	100	100	100	100	100	100	CORE
	795	SSU ribosomal protein S8p (S15Ae)	100	100	100	100	100	100	100	CORE
	803	Translation initiation factor 1	100	100	100	100	100	100	100	CORE
	804	SSU ribosomal protein S13p (S18e)	100	100	100	100	100	100	100	CORE
	805	SSU ribosomal protein S11p (S14e)	100	100	100	100	100	100	100	CORE
	809	Deoxyuridine 5'-triphosphate nucleotidohydrolase (EC 3.6.1.23)	100	100	100	100	100	100	100	CORE
	812	Diacylglycerol kinase (EC 2.7.1.107)	100	100	100	100	100	100	100	CORE
	813	hypothetical protein	100	100	100	100	100	100	100	CORE
	818	S-methyl-5'-thioinosine phosphorylase (EC 2.4.2.44)	100	100	100	100	100	100	100	CORE
	821	Phosphoserine phosphatase (EC 3.1.3.3)	100	100	100	100	100	100	100	CORE
	825	tRNA pseudouridine(13) synthase (EC 5.4.99.27)	100	100	100	100	100	100	100	CORE
	832	membrane protein involved in aromatic hydrocarbon degradation	100	100	100	100	100	100	100	CORE
	837	Bacterial ribosome SSU maturation protein RimP	100	100	100	100	100	100	100	CORE
	841	tRNA pseudouridine(55) synthase (EC 5.4.99.25)	100	100	100	100	100	100	100	CORE
	842	SSU ribosomal protein S15p (S13e)	100	100	100	100	100	100	100	CORE
	845	Hydroxyacylglutathione hydrolase (EC 3.1.2.6)	100	100	100	100	100	100	100	CORE
	846	FIG005121: SAM-dependent methyltransferase (EC 2.1.1.-)	100	100	100	100	100	100	100	CORE
	847	Ribonuclease HI (EC 3.1.26.4)	100	100	100	100	100	100	100	CORE
	849	Roadblock/LC7	100	100	100	100	100	100	100	CORE
	853	Ornithine carbamoyltransferase (EC 2.1.3.3)	100	100	100	100	100	100	100	CORE
	854	Acetylornithine aminotransferase (EC 2.6.1.11)	100	100	100	100	100	100	100	CORE
	859	hypothetical protein	100	100	100	100	100	100	100	CORE
	861	hypothetical protein	100	100	100	100	100	100	100	CORE
	872	Aconitate hydratase (EC 4.2.1.3)	100	100	100	100	100	100	100	CORE
	875	hypothetical protein	100	100	100	100	100	100	100	CORE
	911	hypothetical protein	100	100	100	100	100	100	100	CORE
	929	hypothetical protein	100	100	100	100	100	100	100	CORE
	932	RNA polymerase sigma factor RpoE	100	100	100	100	100	100	100	CORE
	933	hypothetical protein	100	100	100	100	100	100	100	CORE
	935	Translation elongation factor LepA	100	100	100	100	100	100	100	CORE
	936	Signal peptidase I (EC 3.4.21.89)	100	100	100	100	100	100	100	CORE
	939	GTP-binding protein Era	100	100	100	100	100	100	100	CORE
	942	Holo-[acyl-carrier-protein] synthase (EC 2.7.8.7)	100	100	100	100	100	100	100	CORE
	946	33 kDa chaperonin HslO	100	100	100	100	100	100	100	CORE
	947	Toxin YhaV	100	100	100	100	100	100	100	CORE
	948	Antitoxin PrlF	100	100	100	100	100	100	100	CORE
	950	hypothetical protein	100	100	100	100	100	100	100	CORE
	955	hypothetical protein	100	100	100	100	100	100	100	CORE
	959	hypothetical protein	100	100	100	100	100	100	100	CORE
	960	hypothetical protein	100	100	100	100	100	100	100	CORE
	962	Glycosyl transferase, group 1	100	100	100	100	100	100	100	CORE
	974	Phosphate transport system permease protein PstC (TC 3.A.1.7.1)	100	100	100	100	100	100	100	CORE
	975	Phosphate transport system permease protein PstA (TC 3.A.1.7.1)	100	100	100	100	100	100	100	CORE
	980	DedA	100	100	100	100	100	100	100	CORE
	981	SSU ribosomal protein S2p (SAe)	100	100	100	100	100	100	100	CORE
	982	Translation elongation factor Ts	100	100	100	100	100	100	100	CORE
	985	Undecaprenyl diphosphate synthase (EC 2.5.1.31)	100	100	100	100	100	100	100	CORE
	995	Aminotransferase, DegT/DnrJ/EryC1/StrS family	100	100	100	100	100	100	100	CORE
	996	Lipid-A-disaccharide synthase (EC 2.4.1.182)	100	100	100	100	100	100	100	CORE
	997	Ribonuclease HII (EC 3.1.26.4)	100	100	100	100	100	100	100	CORE
	1003	Xylulose-1,5-bisphosphate phosphatase CbbY, converts this Rubisco inhibiting byproduct to xylulose-5P	100	100	100	100	100	100	100	CORE
	1005	Thiol peroxidase, Bcp-type (EC 1.11.1.15)	100	100	100	100	100	100	100	CORE
	1007	Biosynthetic arginine decarboxylase (EC 4.1.1.19)	100	100	100	100	100	100	100	CORE
	1011	Glutathione S-transferase (EC 2.5.1.18)	100	100	100	100	100	100	100	CORE
	1012	hypothetical protein	100	100	100	100	100	100	100	CORE
	1013	hypothetical protein	100	100	100	100	100	100	100	CORE
	1014	Ferredoxin-like protein FixX	100	100	100	100	100	100	100	CORE
	1016	Electron transfer flavoprotein, alpha subunit FixB	100	100	100	100	100	100	100	CORE
	1029	Iron compound ABC transporter, ATP-binding protein	100	100	100	100	100	100	100	CORE
	1034	Cobalt-zinc-cadmium resistance protein	100	100	100	100	100	100	100	CORE
	1037	ATPase, AAA family	100	100	100	100	100	100	100	CORE
	1038	hypothetical protein	100	100	100	100	100	100	100	CORE
	1039	putative regulatory protein, FmdB family	100	100	100	100	100	100	100	CORE
	1040	Ankyrin	100	100	100	100	100	100	100	CORE
	1041	TOMM biosynthesis dehydrogenase (protein B)	100	100	100	100	100	100	100	CORE
	1042	Nitrogenase stabilizing/protective protein NifW	100	100	100	100	100	100	100	CORE
	1045	Cysteine desulfurase (EC 2.8.1.7) => NifS	100	100	100	100	100	100	100	CORE
	1046	Iron-sulfur cluster assembly scaffold protein NifU	100	100	100	100	100	100	100	CORE
	1047	probable iron binding protein from the HesB_IscA_SufA family in Nif operon	100	100	100	100	100	100	100	CORE
	1048	hypothetical protein	100	100	100	100	100	100	100	CORE
	1049	Nitrogenase FeMo-cofactor synthesis molybdenum delivery protein NifQ	100	100	100	100	100	100	100	CORE
	1052	NifX-associated protein	100	100	100	100	100	100	100	CORE
	1053	Nitrogenase FeMo-cofactor carrier protein NifX	100	100	100	100	100	100	100	CORE
	1060	Nitrogenase (molybdenum-iron) reductase and maturation protein NifH	100	100	100	100	100	100	100	CORE
	1061	Response regulator receiver protein	100	100	100	100	100	100	100	CORE
	1063	ADP-ribosyl-[dinitrogen reductase] glycohydrolase (EC 3.2.2.24) / Nitrogenase-associated protein NifO	100	100	100	100	100	100	100	CORE
	1065	Nitrogenase FeMo-cofactor synthesis FeS core scaffold and assembly protein NifB	100	100	100	100	100	100	100	CORE
	1066	4Fe-4S ferredoxin, nitrogenase-associated	100	100	100	100	100	100	100	CORE
	1067	probable iron binding protein from the HesB_IscA_SufA family in Nif operon	100	100	100	100	100	100	100	CORE
	1068	hypothetical protein	100	100	100	100	100	100	100	CORE
	1076	Aminotransferase, DegT/DnrJ/EryC1/StrS family	100	100	100	100	100	100	100	CORE
	1094	hypothetical protein	100	100	100	100	100	100	100	CORE
	1097	Putative TEGT family carrier/transport protein	100	100	100	100	100	100	100	CORE
	1099	hypothetical protein	100	100	100	100	100	100	100	CORE
	1102	Pantoate--beta-alanine ligase (EC 6.3.2.1)	100	100	100	100	100	100	100	CORE
	1103	3-methyl-2-oxobutanoate hydroxymethyltransferase (EC 2.1.2.11)	100	100	100	100	100	100	100	CORE
	1104	Deoxyadenosine kinase (EC 2.7.1.76) @ Deoxyguanosine kinase (EC 2.7.1.113)	100	100	100	100	100	100	100	CORE
	1112	GMP synthase [glutamine-hydrolyzing], amidotransferase subunit (EC 6.3.5.2) / GMP synthase [glutamine-hydrolyzing], ATP pyrophosphatase subunit (EC 6.3.5.2)	100	100	100	100	100	100	100	CORE
	1114	VapB protein (antitoxin to VapC)	100	100	100	100	100	100	100	CORE
	1133	hypothetical protein	100	100	100	100	100	100	100	CORE
	1143	hypothetical protein	100	100	100	100	100	100	100	CORE
	1147	hypothetical protein	100	100	100	100	100	100	100	CORE
	1150	Acetoin dehydrogenase E1 component alpha-subunit (EC 2.3.1.190)	100	100	100	100	100	100	100	CORE
	1151	hypothetical protein	100	100	100	100	100	100	100	CORE
	1155	Septum-associated rare lipoprotein A	100	100	100	100	100	100	100	CORE
	1156	N-succinyl-L,L-diaminopimelate desuccinylase (EC 3.5.1.18)	100	100	100	100	100	100	100	CORE
	1159	Protein of unknown function DUF6	100	100	100	100	100	100	100	CORE
	1161	3-demethylubiquinol 3-O-methyltransferase (EC 2.1.1.64) @ 2-polyprenyl-6-hydroxyphenyl methylase (EC 2.1.1.222)	100	100	100	100	100	100	100	CORE
	1176	Glyoxalase family protein	100	100	100	100	100	100	100	CORE
	1182	4Fe-4S dicluster domain / Domain of unknown function DUF3470	100	100	100	100	100	100	100	CORE
	1187	hypothetical protein	100	100	100	100	100	100	100	CORE
	1189	Glycosyl transferase, family 2	100	100	100	100	100	100	100	CORE
	1191	hypothetical protein	100	100	100	100	100	100	100	CORE
	1205	hypothetical protein	100	100	100	100	100	100	100	CORE
	1209	hypothetical protein	100	100	100	100	100	100	100	CORE
	1210	SOS-response repressor and protease LexA (EC 3.4.21.88)	100	100	100	100	100	100	100	CORE
	1212	DNA polymerase IV-like protein ImuB	100	100	100	100	100	100	100	CORE
	1216	Adenylate cyclase (EC 4.6.1.1)	100	100	100	100	100	100	100	CORE
	1217	ParA-like protein	100	100	100	100	100	100	100	CORE
	1218	Polyphosphate kinase (EC 2.7.4.1)	100	100	100	100	100	100	100	CORE
	1227	RNA-binding protein Hfq	100	100	100	100	100	100	100	CORE
	1228	Ribosome LSU-associated GTP-binding protein HflX	100	100	100	100	100	100	100	CORE
	1234	Polyphosphate kinase 2 (EC 2.7.4.1)	100	100	100	100	100	100	100	CORE
	1246	Phosphate:acyl-ACP acyltransferase PlsX (EC 2.3.1.n2)	100	100	100	100	100	100	100	CORE
	1247	3-oxoacyl-[acyl-carrier-protein] synthase, KASIII (EC 2.3.1.180)	100	100	100	100	100	100	100	CORE
	1250	Acyl carrier protein	100	100	100	100	100	100	100	CORE
	1253	FIG004453: protein YceG like	100	100	100	100	100	100	100	CORE
	1256	Type IV pilus biogenesis protein PilZ	100	100	100	100	100	100	100	CORE
	1258	DNA polymerase III subunits gamma and tau (EC 2.7.7.7)	100	100	100	100	100	100	100	CORE
	1260	Recombination protein RecR	100	100	100	100	100	100	100	CORE
	1265	tRNA threonylcarbamoyladenosine biosynthesis protein TsaE	100	100	100	100	100	100	100	CORE
	1268	Nucleoside diphosphate kinase (EC 2.7.4.6)	100	100	100	100	100	100	100	CORE
	1272	(E)-4-hydroxy-3-methylbut-2-enyl-diphosphate synthase (flavodoxin) (EC 1.17.7.3)	100	100	100	100	100	100	100	CORE
	1274	FIG00449901: hypothetical protein	100	100	100	100	100	100	100	CORE
	1280	Phosphate transport system permease protein PstA (TC 3.A.1.7.1)	100	100	100	100	100	100	100	CORE
	1285	Uncharacterized UPF0721 integral membrane protein	100	100	100	100	100	100	100	CORE
	1289	hypothetical protein	100	100	100	100	100	100	100	CORE
	1305	ADP-L-glycero-D-manno-heptose-6-epimerase (EC 5.1.3.20)	100	100	100	100	100	100	100	CORE
	1308	ClpB protein	100	100	100	100	100	100	100	CORE
	1310	Chorismate synthase (EC 4.2.3.5)	100	100	100	100	100	100	100	CORE
	1322	hypothetical protein	100	100	100	100	100	100	100	CORE
	1324	Peptidyl-prolyl cis-trans isomerase PpiB (EC 5.2.1.8)	100	100	100	100	100	100	100	CORE
	1330	C4-dicarboxylate transporter/malic acid transport protein	100	100	100	100	100	100	100	CORE
	1339	hypothetical protein	100	100	100	100	100	100	100	CORE
	1348	hypothetical protein	100	100	100	100	100	100	100	CORE
	1351	Acetyltransferase, GNAT family	100	100	100	100	100	100	100	CORE
	1353	hypothetical protein	100	100	100	100	100	100	100	CORE
	1367	Propeptide PepSY amd peptidase M4	100	100	100	100	100	100	100	CORE
	1382	hypothetical protein	100	100	100	100	100	100	100	CORE
	1395	Amidophosphoribosyltransferase (EC 2.4.2.14)	100	100	100	100	100	100	100	CORE
	1396	Colicin V production protein	100	100	100	100	100	100	100	CORE
	1398	Acetyl-coenzyme A carboxyl transferase beta chain (EC 6.4.1.2)	100	100	100	100	100	100	100	CORE
	1399	Tryptophan synthase alpha chain (EC 4.2.1.20)	100	100	100	100	100	100	100	CORE
	1401	Phosphoribosylanthranilate isomerase (EC 5.3.1.24)	100	100	100	100	100	100	100	CORE
	1410	Signal peptide peptidase SppA (protease 4)	100	100	100	100	100	100	100	CORE
	1416	Heat shock protein Hsp20	100	100	100	100	100	100	100	CORE
	1417	Alcohol dehydrogenase GroES domain protein	100	100	100	100	100	100	100	CORE
	1430	hypothetical protein	100	100	100	100	100	100	100	CORE
	1431	hypothetical protein	100	100	100	100	100	100	100	CORE
	1453	Squalene---hopene cyclase (EC 5.4.99.17) @ Squalene---hopanol cyclase (EC 4.2.1.129)	100	100	100	100	100	100	100	CORE
	1458	VapB protein (antitoxin to VapC)	100	100	100	100	100	100	100	CORE
	1461	Prolyl-tRNA synthetase (EC 6.1.1.15), bacterial type	100	100	100	100	100	100	100	CORE
	1462	UspA	100	100	100	100	100	100	100	CORE
	1463	putative lipoprotein	100	100	100	100	100	100	100	CORE
	1465	Protein-L-isoaspartate O-methyltransferase (EC 2.1.1.77)	100	100	100	100	100	100	100	CORE
	1466	Isochorismatase (EC 3.3.2.1)	100	100	100	100	100	100	100	CORE
	1468	Uncharacterized protein YmdB	100	100	100	100	100	100	100	CORE
	1475	GTP-binding and nucleic acid-binding protein YchF	100	100	100	100	100	100	100	CORE
	1479	Hydrogenase-4 component E	100	100	100	100	100	100	100	CORE
	1485	Rubisco activation protein CbbO	100	100	100	100	100	100	100	CORE
	1486	RuBisCO operon transcriptional regulator CbbR	100	100	100	100	100	100	100	CORE
	1498	outer membrane efflux protein	100	100	100	100	100	100	100	CORE
	1502	Adenosine (5')-pentaphospho-(5'')-adenosine pyrophosphohydrolase	100	100	100	100	100	100	100	CORE
	1504	Ribosomal small subunit pseudouridine synthase A (EC 5.4.99.19)	100	100	100	100	100	100	100	CORE
	1509	hypothetical protein	100	100	100	100	100	100	100	CORE
	1524	Frataxin homolog CyaY, facilitates Fe-S cluster assembly, interacts with IscS	100	100	100	100	100	100	100	CORE
	1526	hypothetical protein	100	100	100	100	100	100	100	CORE
	1529	Cytosol aminopeptidase PepA (EC 3.4.11.1)	100	100	100	100	100	100	100	CORE
	1530	DNA polymerase III chi subunit (EC 2.7.7.7)	100	100	100	100	100	100	100	CORE
	1531	hypothetical protein	100	100	100	100	100	100	100	CORE
	1535	hypothetical protein	100	100	100	100	100	100	100	CORE
	1538	Dienelactone hydrolase family protein	100	100	100	100	100	100	100	CORE
	1540	hypothetical protein	100	100	100	100	100	100	100	CORE
	1542	Methyltransferase, FkbM family	100	100	100	100	100	100	100	CORE
	1549	Cysteinyl-tRNA synthetase (EC 6.1.1.16)	100	100	100	100	100	100	100	CORE
	1556	Haloacid dehalogenase-like hydrolase	100	100	100	100	100	100	100	CORE
	1557	DNA-binding response regulator KdpE	100	100	100	100	100	100	100	CORE
	1558	Osmosensitive K+ channel histidine kinase KdpD	100	100	100	100	100	100	100	CORE
	1561	Potassium-transporting ATPase A chain (EC 3.6.3.12) (TC 3.A.3.7.1)	100	100	100	100	100	100	100	CORE
	1565	hypothetical protein	100	100	100	100	100	100	100	CORE
	1566	aspartate/glutamate/uridylate kinase	100	100	100	100	100	100	100	CORE
	1585	hypothetical protein	100	100	100	100	100	100	100	CORE
	1586	CDP-abequose synthase (Fragment)	100	100	100	100	100	100	100	CORE
	1587	Transmembrane protein co-occuring with sulfite exporter TauE/SafE	100	100	100	100	100	100	100	CORE
	1588	Sulfite exporter TauE/SafE	100	100	100	100	100	100	100	CORE
	1589	Universal stress protein UspA and related nucleotide-binding proteins	100	100	100	100	100	100	100	CORE
	1591	Phosphoribosylamine--glycine ligase (EC 6.3.4.13)	100	100	100	100	100	100	100	CORE
	1593	Coproporphyrinogen III oxidase, aerobic (EC 1.3.3.3)	100	100	100	100	100	100	100	CORE
	1595	hypothetical protein	100	100	100	100	100	100	100	CORE
	1597	Acetyltransferase	100	100	100	100	100	100	100	CORE
	1601	MotA/TolQ/ExbB proton channel	100	100	100	100	100	100	100	CORE
	1607	TonB family protein	100	100	100	100	100	100	100	CORE
	1608	hypothetical protein	100	100	100	100	100	100	100	CORE
	1610	Alpha-D-ribose 1-methylphosphonate 5-triphosphate synthase subunit PhnG (EC 2.7.8.37)	100	100	100	100	100	100	100	CORE
	1613	Alpha-D-ribose 1-methylphosphonate 5-phosphate C-P lyase (EC 4.7.1.1)	100	100	100	100	100	100	100	CORE
	1614	Phosphonates utilization ATP-binding protein PhnK	100	100	100	100	100	100	100	CORE
	1615	Alpha-D-ribose 1-methylphosphonate 5-triphosphate synthase subunit PhnL (EC 2.7.8.37)	100	100	100	100	100	100	100	CORE
	1616	Alpha-D-ribose 1-methylphosphonate 5-triphosphate diphosphatase (EC 3.6.1.63)	100	100	100	100	100	100	100	CORE
	1618	ATP-binding protein PhnN; Guanylate kinase (EC 2.7.4.8)	100	100	100	100	100	100	100	CORE
	1623	hypothetical protein	100	100	100	100	100	100	100	CORE
	1627	hypothetical protein	100	100	100	100	100	100	100	CORE
	1628	hypothetical protein	100	100	100	100	100	100	100	CORE
	1630	hypothetical protein	100	100	100	100	100	100	100	CORE
	1631	TonB-dependent receptor	100	100	100	100	100	100	100	CORE
	1637	putative TonB-dependent receptor	100	100	100	100	100	100	100	CORE
	1638	Alkaline phosphatase	100	100	100	100	100	100	100	CORE
	1639	Two-component transcriptional response regulator, winged helix family	100	100	100	100	100	100	100	CORE
	1640	hypothetical protein	100	100	100	100	100	100	100	CORE
	1642	Transposase	100	100	100	100	100	100	100	CORE
	1648	Two-component transcriptional response regulator, winged helix family	100	100	100	100	100	100	100	CORE
	1651	3'-to-5' oligoribonuclease (orn)	100	100	100	100	100	100	100	CORE
	1656	hypothetical protein	100	100	100	100	100	100	100	CORE
	1661	hypothetical protein	100	100	100	100	100	100	100	CORE
	1666	Transamidase GatB domain protein	100	100	100	100	100	100	100	CORE
	1667	SSU ribosomal protein S21p	100	100	100	100	100	100	100	CORE
	1674	Ferritin/ribonucleotide reductase-like protein	100	100	100	100	100	100	100	CORE
	1680	SAM-dependent methyltransferase	100	100	100	100	100	100	100	CORE
	1687	N-acetylmuramoyl-L-alanine amidase (EC 3.5.1.28)	100	100	100	100	100	100	100	CORE
	1690	Rhodanese-related sulfurtransferase YibN	100	100	100	100	100	100	100	CORE
	1693	Secretion protein HlyD	100	100	100	100	100	100	100	CORE
	1699	Anticodon nuclease	100	100	100	100	100	100	100	CORE
	1700	hypothetical protein	100	100	100	100	100	100	100	CORE
	1702	hypothetical protein	100	100	100	100	100	100	100	CORE
	1703	restriction modification system DNA specificity domain	100	100	100	100	100	100	100	CORE
	1704	hypothetical protein	100	100	100	100	100	100	100	CORE
	1705	hypothetical protein	100	100	100	100	100	100	100	CORE
	1709	ABC transporter, substrate-binding protein (cluster 12, methionine/phosphonates)	100	100	100	100	100	100	100	CORE
	1712	Putative deoxyribonuclease YjjV	100	100	100	100	100	100	100	CORE
	1713	2-polyprenyl-6-methoxyphenol hydroxylase	100	100	100	100	100	100	100	CORE
	1714	2-polyprenylphenol hydroxylase	100	100	100	100	100	100	100	CORE
	1715	protein of unknown function DUF526	100	100	100	100	100	100	100	CORE
	1716	AAA+ ATPase superfamily protein YifB/ComM, associated with DNA recombination	100	100	100	100	100	100	100	CORE
	1725	Integrase/recombinase, RitC	100	100	100	100	100	100	100	CORE
	1762	NAD synthetase (EC 6.3.1.5) / Glutamine amidotransferase chain of NAD synthetase	100	100	100	100	100	100	100	CORE
	1763	Nitrogen regulatory protein P-II	100	100	100	100	100	100	100	CORE
	1766	FIG00003370: Multicopper polyphenol oxidase	100	100	100	100	100	100	100	CORE
	1767	1,2-dihydroxy-3-keto-5-methylthiopentene dioxygenase (EC 1.13.11.54)	100	100	100	100	100	100	100	CORE
	1769	2-hydroxy-3-keto-5-methylthiopentenyl-1-phosphate phosphatase (EC 3.1.3.87)	100	100	100	100	100	100	100	CORE
	1770	Methylthioribulose-1-phosphate dehydratase (EC 4.2.1.109)	100	100	100	100	100	100	100	CORE
	1771	Glycine cleavage system transcriptional antiactivator GcvR	100	100	100	100	100	100	100	CORE
	1772	Peptide deformylase (EC 3.5.1.88)	100	100	100	100	100	100	100	CORE
	1775	dTDP-glucose 4,6-dehydratase (EC 4.2.1.46)	100	100	100	100	100	100	100	CORE
	1777	hypothetical protein	100	100	100	100	100	100	100	CORE
	1778	hypothetical protein	100	100	100	100	100	100	100	CORE
	1780	Uncharacterized membrane anchored protein BMD_5004	100	100	100	100	100	100	100	CORE
	1782	hypothetical protein	100	100	100	100	100	100	100	CORE
	1783	Osmosensitive K+ channel histidine kinase KdpD	100	100	100	100	100	100	100	CORE
	1785	NAD kinase (EC 2.7.1.23)	100	100	100	100	100	100	100	CORE
	1786	Pantothenate kinase type III, CoaX-like (EC 2.7.1.33)	100	100	100	100	100	100	100	CORE
	1797	hypothetical protein	100	100	100	100	100	100	100	CORE
	1802	Protein-L-isoaspartate O-methyltransferase (EC 2.1.1.77)	100	100	100	100	100	100	100	CORE
	1806	Homoserine dehydrogenase (EC 1.1.1.3)	100	100	100	100	100	100	100	CORE
	1807	Threonine synthase (EC 4.2.3.1)	100	100	100	100	100	100	100	CORE
	1810	conserved hypothetical protein, related to putative virulence-associated proteins and nitrogen regulatory protein NtrP	100	100	100	100	100	100	100	CORE
	1813	Lysyl-tRNA synthetase (class II) (EC 6.1.1.6)	100	100	100	100	100	100	100	CORE
	1815	Lipoprotein-releasing system ATP-binding protein LolD	100	100	100	100	100	100	100	CORE
	1819	Biopolymer transport protein ExbD/TolR	100	100	100	100	100	100	100	CORE
	1821	hypothetical protein	100	100	100	100	100	100	100	CORE
	1835	Tetraacyldisaccharide 4'-kinase (EC 2.7.1.130)	100	100	100	100	100	100	100	CORE
	1836	FIG002473: Protein YcaR in KDO2-Lipid A biosynthesis cluster	100	100	100	100	100	100	100	CORE
	1837	3-deoxy-manno-octulosonate cytidylyltransferase (EC 2.7.7.38)	100	100	100	100	100	100	100	CORE
	1838	Inorganic pyrophosphatase (EC 3.6.1.1)	100	100	100	100	100	100	100	CORE
	1840	integron integrase	100	100	100	100	100	100	100	CORE
	1841	hypothetical protein	100	100	100	100	100	100	100	CORE
	1842	hypothetical protein	100	100	100	100	100	100	100	CORE
	1845	Aldo/keto reductase	100	100	100	100	100	100	100	CORE
	1847	hypothetical protein	100	100	100	100	100	100	100	CORE
	1856	Integrase/recombinase, RitC	100	100	100	100	100	100	100	CORE
	1866	UPF0061 protein YdiU	100	100	100	100	100	100	100	CORE
	1867	ATP-dependent Clp protease ATP-binding subunit ClpA	100	100	100	100	100	100	100	CORE
	1873	2,3-bisphosphoglycerate-independent phosphoglycerate mutase (EC 5.4.2.12)	100	100	100	100	100	100	100	CORE
	1874	Glycogen phosphorylase (EC 2.4.1.1)	100	100	100	100	100	100	100	CORE
	1875	hypothetical protein	100	100	100	100	100	100	100	CORE
	1881	Adenosylhomocysteinase (EC 3.3.1.1)	100	100	100	100	100	100	100	CORE
	1882	5,10-methylenetetrahydrofolate reductase (EC 1.5.1.20)	100	100	100	100	100	100	100	CORE
	1883	Phosphoribulokinase (EC 2.7.1.19)	100	100	100	100	100	100	100	CORE
	1891	Heat shock protein 60 family co-chaperone GroES	100	100	100	100	100	100	100	CORE
	1894	hypothetical protein	100	100	100	100	100	100	100	CORE
	1895	Branched-chain amino acid aminotransferase (EC 2.6.1.42)	100	100	100	100	100	100	100	CORE
	1902	DNA-binding protein HBsu	100	100	100	100	100	100	100	CORE
	1904	hypothetical protein	100	100	100	100	100	100	100	CORE
	1913	URF-1	100	100	100	100	100	100	100	CORE
	1914	Mercuric transport protein, MerC	100	100	100	100	100	100	100	CORE
	1916	Glucan 1,4-alpha-glucosidase (EC 3.2.1.3)	100	100	100	100	100	100	100	CORE
	1917	Mercuric resistance operon coregulator	100	100	100	100	100	100	100	CORE
	1918	Transposon Tn21 modulator protein	100	100	100	100	100	100	100	CORE
	1922	hypothetical protein	100	100	100	100	100	100	100	CORE
	1924	hypothetical protein	100	100	100	100	100	100	100	CORE
	1925	hypothetical protein	100	100	100	100	100	100	100	CORE
	1926	hypothetical protein	100	100	100	100	100	100	100	CORE
	1927	hypothetical protein	100	100	100	100	100	100	100	CORE
	1930	hypothetical protein	100	100	100	100	100	100	100	CORE
	1931	putative lipoprotein	100	100	100	100	100	100	100	CORE
	1932	hypothetical protein	100	100	100	100	100	100	100	CORE
	1934	hypothetical protein	100	100	100	100	100	100	100	CORE
	1937	FIGfam110555	100	100	100	100	100	100	100	CORE
	1945	Heavy metal transport/detoxification protein	100	100	100	100	100	100	100	CORE
	1947	Rubisco activation protein CbbO	100	100	100	100	100	100	100	CORE
	1948	von Willebrand factor type A	100	100	100	100	100	100	100	CORE
	1949	hypothetical protein	100	100	100	100	100	100	100	CORE
	1957	FeoA family protein	100	100	100	100	100	100	100	CORE
	1960	N-carbamoylputrescine amidase (EC 3.5.1.53)	100	100	100	100	100	100	100	CORE
	1962	DedA protein	100	100	100	100	100	100	100	CORE
	1963	hypothetical protein	100	100	100	100	100	100	100	CORE
	1964	Glutamine amidotransferase, class I	100	100	100	100	100	100	100	CORE
	1965	Transcriptional regulator, LysR family	100	100	100	100	100	100	100	CORE
	1966	hypothetical protein	100	100	100	100	100	100	100	CORE
	1969	Nitric oxide reductase activation protein NorD	100	100	100	100	100	100	100	CORE
	1972	hypothetical protein	100	100	100	100	100	100	100	CORE
	1973	hypothetical protein	100	100	100	100	100	100	100	CORE
	1977	Biotin synthase-related protein, radical SAM superfamily	100	100	100	100	100	100	100	CORE
	1983	Glycine cleavage system H protein like protein HTH_1877	100	100	100	100	100	100	100	CORE
	1989	Heterodisulfide reductase subunit C like protein HTH_1883	100	100	100	100	100	100	100	CORE
	1990	hypothetical protein	100	100	100	100	100	100	100	CORE
	1991	Uncharacterized SirA/YedF/YeeD family protein HTH_1886	100	100	100	100	100	100	100	CORE
	1994	hypothetical protein	100	100	100	100	100	100	100	CORE
	1995	Cyclic pyranopterin monophosphate synthase accessory protein	100	100	100	100	100	100	100	CORE
	1997	Rod shape-determining protein MreB	100	100	100	100	100	100	100	CORE
	1999	Rod shape-determining protein MreD	100	100	100	100	100	100	100	CORE
	2002	D-alanyl-D-alanine carboxypeptidase (EC 3.4.16.4)	100	100	100	100	100	100	100	CORE
	2011	ATP/GTP-binding protein	100	100	100	100	100	100	100	CORE
	2016	Histidinol-phosphatase (EC 3.1.3.15)	100	100	100	100	100	100	100	CORE
	2018	hypothetical protein	100	100	100	100	100	100	100	CORE
	2020	hypothetical protein	100	100	100	100	100	100	100	CORE
	2021	FIG053235: Diacylglucosamine hydrolase like	100	100	100	100	100	100	100	CORE
	2024	hypothetical protein	100	100	100	100	100	100	100	CORE
	2037	hypothetical protein	100	100	100	100	100	100	100	CORE
	2038	ABC transporter, ATP-binding protein	100	100	100	100	100	100	100	CORE
	2039	hypothetical protein	100	100	100	100	100	100	100	CORE
	2046	LSU ribosomal protein L35p	100	100	100	100	100	100	100	CORE
	2049	NADH-ubiquinone oxidoreductase chain N (EC 1.6.5.3)	100	100	100	100	100	100	100	CORE
	2051	NADH-ubiquinone oxidoreductase chain L (EC 1.6.5.3)	100	100	100	100	100	100	100	CORE
	2053	NADH-ubiquinone oxidoreductase chain J (EC 1.6.5.3)	100	100	100	100	100	100	100	CORE
	2054	NADH-ubiquinone oxidoreductase chain I (EC 1.6.5.3)	100	100	100	100	100	100	100	CORE
	2055	NADH-ubiquinone oxidoreductase chain H (EC 1.6.5.3)	100	100	100	100	100	100	100	CORE
	2059	NADH-ubiquinone oxidoreductase chain D (EC 1.6.5.3)	100	100	100	100	100	100	100	CORE
	2060	NADH-ubiquinone oxidoreductase chain C (EC 1.6.5.3)	100	100	100	100	100	100	100	CORE
	2061	NADH-ubiquinone oxidoreductase chain B (EC 1.6.5.3)	100	100	100	100	100	100	100	CORE
	2062	NADH ubiquinone oxidoreductase chain A (EC 1.6.5.3)	100	100	100	100	100	100	100	CORE
	2067	Cell division protein FtsH	100	100	100	100	100	100	100	CORE
	2071	MBL-fold metallo-hydrolase superfamily	100	100	100	100	100	100	100	CORE
	2073	Uncharacterized MFS-type transporter	100	100	100	100	100	100	100	CORE
	2075	MBL-fold metallo-hydrolase superfamily	100	100	100	100	100	100	100	CORE
	2083	hypothetical protein	100	100	100	100	100	100	100	CORE
	2085	Copper resistance protein CopD	100	100	100	100	100	100	100	CORE
	2087	hypothetical protein	100	100	100	100	100	100	100	CORE
	2091	FIG003003: hypothetical protein	100	100	100	100	100	100	100	CORE
	2095	Amino acid permease-associated region	100	100	100	100	100	100	100	CORE
	2097	[4Fe-4S] cluster assembly scaffold protein Mrp (=ApbC)	100	100	100	100	100	100	100	CORE
	2098	hypothetical protein	100	100	100	100	100	100	100	CORE
	2099	4-hydroxy-tetrahydrodipicolinate reductase (EC 1.17.1.8)	100	100	100	100	100	100	100	CORE
	2101	Chaperone protein DnaK	100	100	100	100	100	100	100	CORE
	2102	Heat shock protein GrpE	100	100	100	100	100	100	100	CORE
	2106	LSU ribosomal protein L28p @ LSU ribosomal protein L28p, zinc-independent	100	100	100	100	100	100	100	CORE
	2108	2-keto-3-deoxy-D-arabino-heptulosonate-7-phosphate synthase I beta (EC 2.5.1.54)	100	100	100	100	100	100	100	CORE
	2109	Fumarate hydratase class II (EC 4.2.1.2)	100	100	100	100	100	100	100	CORE
	2112	hypothetical protein	100	100	100	100	100	100	100	CORE
	2116	hypothetical protein	100	100	100	100	100	100	100	CORE
	2121	OmpA family protein	100	100	100	100	100	100	100	CORE
	2122	hypothetical protein	100	100	100	100	100	100	100	CORE
	2123	hypothetical protein	100	100	100	100	100	100	100	CORE
	2128	Bacteriocin/lantibiotic efflux ABC transporter, permease/ATP-binding protein	100	100	100	100	100	100	100	CORE
	2135	Type II secretion system protein	100	100	100	100	100	100	100	CORE
	2140	Flp pilus assembly protein TadG	100	100	100	100	100	100	100	CORE
	2143	Flp pilus assembly protein, pilin Flp	100	100	100	100	100	100	100	CORE
	2146	hypothetical protein	100	100	100	100	100	100	100	CORE
	2147	hypothetical protein	100	100	100	100	100	100	100	CORE
	2152	hypothetical protein	100	100	100	100	100	100	100	CORE
	2153	Ribonucleotide reductase of class III (anaerobic), large subunit (EC 1.17.4.2)	100	100	100	100	100	100	100	CORE
	2154	hypothetical protein	100	100	100	100	100	100	100	CORE
	2156	hypothetical protein	100	100	100	100	100	100	100	CORE
	2159	sterol binding protein	100	100	100	100	100	100	100	CORE
	2162	Cytochrome c, class I	100	100	100	100	100	100	100	CORE
	2164	Ubiquinol-cytochrome C reductase iron-sulfur subunit (EC 1.10.2.2)	100	100	100	100	100	100	100	CORE
	2170	23S rRNA (uridine(2552)-2'-O)-methyltransferase (EC 2.1.1.166)	100	100	100	100	100	100	100	CORE
	2171	RNA-binding protein YhbY	100	100	100	100	100	100	100	CORE
	2172	ApaG protein	100	100	100	100	100	100	100	CORE
	2175	hypothetical protein	100	100	100	100	100	100	100	CORE
	2177	hypothetical protein	100	100	100	100	100	100	100	CORE
	2179	Site-specific tyrosine recombinase XerC	100	100	100	100	100	100	100	CORE
	2180	ATP-dependent protease subunit HslV (EC 3.4.25.2)	100	100	100	100	100	100	100	CORE
	2183	RNA polymerase sigma factor RpoH	100	100	100	100	100	100	100	CORE
	2185	Cell-division-associated, ABC-transporter-like signaling protein FtsE	100	100	100	100	100	100	100	CORE
	2187	16S rRNA (guanine(966)-N(2))-methyltransferase (EC 2.1.1.171)	100	100	100	100	100	100	100	CORE
	2188	Phosphopantetheine adenylyltransferase (EC 2.7.7.3)	100	100	100	100	100	100	100	CORE
	2190	hypothetical protein	100	100	100	100	100	100	100	CORE
	2191	Formamidopyrimidine-DNA glycosylase (EC 3.2.2.23)	100	100	100	100	100	100	100	CORE
	2192	Peptide chain release factor N(5)-glutamine methyltransferase (EC 2.1.1.297)	100	100	100	100	100	100	100	CORE
	2196	Outer membrane lipoprotein component of lipoprotein transport system LolB	100	100	100	100	100	100	100	CORE
	2197	4-diphosphocytidyl-2-C-methyl-D-erythritol kinase (EC 2.7.1.148)	100	100	100	100	100	100	100	CORE
	2198	Ribose-phosphate pyrophosphokinase (EC 2.7.6.1)	100	100	100	100	100	100	100	CORE
	2204	VapB protein (antitoxin to VapC)	100	100	100	100	100	100	100	CORE
	2207	Transposase, IS4 family	100	100	100	100	100	100	100	CORE
	2215	Cobalt-zinc-cadmium resistance protein CzcA; Cation efflux system protein CusA	100	100	100	100	100	100	100	CORE
	2219	hypothetical protein	100	100	100	100	100	100	100	CORE
	2221	protein of unknown function DUF74	100	100	100	100	100	100	100	CORE
	2226	hypothetical protein	100	100	100	100	100	100	100	CORE
	2229	hypothetical protein	100	100	100	100	100	100	100	CORE
	2233	Methylphosphotriester-DNA--protein-cysteine S-methyltransferase (EC 2.1.1.n11) / DNA-3-methyladenine glycosylase II (EC 3.2.2.21)	100	100	100	100	100	100	100	CORE
	2242	hypothetical protein	100	100	100	100	100	100	100	CORE
	2251	LSU ribosomal protein L9p	100	100	100	100	100	100	100	CORE
	2254	SSU ribosomal protein S18p @ SSU ribosomal protein S18p, zinc-independent	100	100	100	100	100	100	100	CORE
	2258	ErfK/YbiS/YcfS/YnhG family protein	100	100	100	100	100	100	100	CORE
	2260	hypothetical protein	100	100	100	100	100	100	100	CORE
	2262	hypothetical protein	100	100	100	100	100	100	100	CORE
	2265	Protein QmcA (possibly involved in integral membrane quality control)	100	100	100	100	100	100	100	CORE
	2266	protein of unknown function DUF107	100	100	100	100	100	100	100	CORE
	2270	Alpha-amylase (EC 3.2.1.1)	100	100	100	100	100	100	100	CORE
	2274	putative membrane protein	100	100	100	100	100	100	100	CORE
	2281	hypothetical protein	100	100	100	100	100	100	100	CORE
	2282	LSU ribosomal protein L19p	100	100	100	100	100	100	100	CORE
	2285	SSU ribosomal protein S16p	100	100	100	100	100	100	100	CORE
	2288	Arsenic efflux pump protein	100	100	100	100	100	100	100	CORE
	2289	Arsenical resistance operon repressor	100	100	100	100	100	100	100	CORE
	2292	ABC-type efflux pump, duplicated ATPase component YbhF	100	100	100	100	100	100	100	CORE
	2293	ABC-type efflux pump permease component YbhS	100	100	100	100	100	100	100	CORE
	2296	hypothetical protein	100	100	100	100	100	100	100	CORE
	2298	Repair of Iron Centers di-iron protein	100	100	100	100	100	100	100	CORE
	2299	Glycine cleavage system H protein like protein HTH_1877	100	100	100	100	100	100	100	CORE
	2300	hypothetical protein	100	100	100	100	100	100	100	CORE
	2306	hypothetical protein	100	100	100	100	100	100	100	CORE
	2309	hypothetical protein	100	100	100	100	100	100	100	CORE
	2312	Uncharacterized protein YegL	100	100	100	100	100	100	100	CORE
	2314	Integrase	100	100	100	100	100	100	100	CORE
	2316	Choloylglycine hydrolase	100	100	100	100	100	100	100	CORE
	2318	Programmed cell death toxin MazF	100	100	100	100	100	100	100	CORE
	2320	hypothetical protein	100	100	100	100	100	100	100	CORE
	2321	hypothetical protein	100	100	100	100	100	100	100	CORE
	2322	Programmed cell death toxin MazF like	100	100	100	100	100	100	100	CORE
	2340	Uncharacterized protein YeaG	100	100	100	100	100	100	100	CORE
	2341	Ammonium transporter	100	100	100	100	100	100	100	CORE
	2345	Nitrogen regulatory protein P-II, GlnK	100	100	100	100	100	100	100	CORE
	2347	Glutamine amidotransferase, class I	100	100	100	100	100	100	100	CORE
	2348	hypothetical protein	100	100	100	100	100	100	100	CORE
	2349	17 kDa surface antigen	100	100	100	100	100	100	100	CORE
	2356	Fluoride ion transporter CrcB	100	100	100	100	100	100	100	CORE
	2357	protein of unknown function DUF190	100	100	100	100	100	100	100	CORE
	2358	hypothetical protein	100	100	100	100	100	100	100	CORE
	2360	protein of unknown function DUF1211	100	100	100	100	100	100	100	CORE
	2363	Exodeoxyribonuclease V alpha chain (EC 3.1.11.5)	100	100	100	100	100	100	100	CORE
	2378	Peptide-methionine (R)-S-oxide reductase MsrB (EC 1.8.4.12)	100	100	100	100	100	100	100	CORE
	2382	Ribosomal silencing factor RsfA	100	100	100	100	100	100	100	CORE
	2385	hypothetical protein	100	100	100	100	100	100	100	CORE
	2389	hypothetical protein	100	100	100	100	100	100	100	CORE
	2392	FIG001341: Probable Fe(2+)-trafficking protein YggX	100	100	100	100	100	100	100	CORE
	2394	Capsular polysaccharide export system inner membrane protein KpsE	100	100	100	100	100	100	100	CORE
	2405	3'(2'),5'-bisphosphate nucleotidase (EC 3.1.3.7)	100	100	100	100	100	100	100	CORE
	2411	hypothetical protein	100	100	100	100	100	100	100	CORE
	2416	VapB protein (antitoxin to VapC)	100	100	100	100	100	100	100	CORE
	2418	hypothetical protein	100	100	100	100	100	100	100	CORE
	2419	Efflux ABC transporter, permease/ATP-binding protein Atu2242	100	100	100	100	100	100	100	CORE
	2420	Acetyltransferase, GNAT family	100	100	100	100	100	100	100	CORE
	2423	opine ABC transporter, ATP-binding protein, putative	100	100	100	100	100	100	100	CORE
	2436	MotA/TolQ/ExbB proton channel	100	100	100	100	100	100	100	CORE
	2444	Capsular polysaccharide biosynthesis/export periplasmic protein WcbA; Capsular polysaccharide export system protein KpsC	100	100	100	100	100	100	100	CORE
	2446	Putative oxidoreductase	100	100	100	100	100	100	100	CORE
	2451	Phosphocarrier protein, nitrogen regulation associated	100	100	100	100	100	100	100	CORE
	2453	RNase adapter protein RapZ	100	100	100	100	100	100	100	CORE
	2454	HPr kinase/phosphorylase	100	100	100	100	100	100	100	CORE
	2456	Ribosome hibernation promoting factor Hpf	100	100	100	100	100	100	100	CORE
	2460	Lipopolysaccharide export system protein LptC	100	100	100	100	100	100	100	CORE
	2461	3-deoxy-D-manno-octulosonate 8-phosphate phosphatase (EC 3.1.3.45)	100	100	100	100	100	100	100	CORE
	2471	YrbA protein	100	100	100	100	100	100	100	CORE
	2473	UDP-N-acetylglucosamine 1-carboxyvinyltransferase (EC 2.5.1.7)	100	100	100	100	100	100	100	CORE
	2475	Histidinol dehydrogenase (EC 1.1.1.23)	100	100	100	100	100	100	100	CORE
	2478	Imidazole glycerol phosphate synthase amidotransferase subunit (EC 2.4.2.-)	100	100	100	100	100	100	100	CORE
	2482	Twin-arginine translocation protein TatA	100	100	100	100	100	100	100	CORE
	2483	Twin-arginine translocation protein TatB	100	100	100	100	100	100	100	CORE
	2486	Ribulose bisphosphate carboxylase small chain (EC 4.1.1.39)	100	100	100	100	100	100	100	CORE
	2487	hypothetical protein	100	100	100	100	100	100	100	CORE
	2488	Rubisco activation protein CbbQ	100	100	100	100	100	100	100	CORE
	2501	Iron-sulfur cluster insertion protein ErpA	100	100	100	100	100	100	100	CORE
	2502	Dihydrolipoamide acetyltransferase component (E2) of acetoin dehydrogenase complex (EC 2.3.1.12) / Dihydrolipoamide dehydrogenase of acetoin dehydrogenase (EC 1.8.1.4)	100	100	100	100	100	100	100	CORE
	2503	Acetoin dehydrogenase E1 component beta-subunit (EC 2.3.1.190)	100	100	100	100	100	100	100	CORE
	2504	Acetoin dehydrogenase E1 component alpha-subunit (EC 2.3.1.190)	100	100	100	100	100	100	100	CORE
	2509	SSU ribosomal protein S9p (S16e)	100	100	100	100	100	100	100	CORE
	2510	LSU ribosomal protein L13p (L13Ae)	100	100	100	100	100	100	100	CORE
	2511	hypothetical protein	100	100	100	100	100	100	100	CORE
	2516	Tyrosyl-tRNA synthetase (EC 6.1.1.1)	100	100	100	100	100	100	100	CORE
	2524	hypothetical protein	100	100	100	100	100	100	100	CORE
	2525	hypothetical protein	100	100	100	100	100	100	100	CORE
	2528	hypothetical protein	100	100	100	100	100	100	100	CORE
	2530	ATP-dependent DNA helicase UvrD/PcrA (EC 3.6.4.12)	100	100	100	100	100	100	100	CORE
	2532	hypothetical protein	100	100	100	100	100	100	100	CORE
	2536	hypothetical protein	100	100	100	100	100	100	100	CORE
	2553	hypothetical protein	100	100	100	100	100	100	100	CORE
	2555	Sulfite reductase [NADPH] hemoprotein beta-component (EC 1.8.1.2)	100	100	100	100	100	100	100	CORE
	2559	Uroporphyrinogen-III methyltransferase (EC 2.1.1.107)	100	100	100	100	100	100	100	CORE
	2560	Sirohydrochlorin cobaltochelatase CbiX(small) (EC 4.99.1.3)	100	100	100	100	100	100	100	CORE
	2565	hypothetical protein	100	100	100	100	100	100	100	CORE
	2570	hypothetical protein	100	100	100	100	100	100	100	CORE
	2581	Rusticyanin	100	100	100	100	100	100	100	CORE
	2596	hypothetical protein	100	100	100	100	100	100	100	CORE
	2598	Acetyltransferase, GNAT family	100	100	100	100	100	100	100	CORE
	2599	Chorismate mutase	100	100	100	100	100	100	100	CORE
	2600	Efflux ABC transporter, ATP-binding protein	100	100	100	100	100	100	100	CORE
	2602	Acetyltransferase, GNAT family	100	100	100	100	100	100	100	CORE
	2609	hypothetical protein	100	100	100	100	100	100	100	CORE
	2617	transposase-like protein TnpA3	100	100	100	100	100	100	100	CORE
	2618	transposase, IS5 family	100	100	100	100	100	100	100	CORE
	2627	Transposase	100	100	100	100	100	100	100	CORE
	2631	Type III restriction-modification enzyme helicase subunit	100	100	100	100	100	100	100	CORE
	2634	Uncharacterized protein BT3327	100	100	100	100	100	100	100	CORE
	2636	hypothetical protein	100	100	100	100	100	100	100	CORE
	2642	ATP synthase epsilon chain (EC 3.6.3.14)	100	100	100	100	100	100	100	CORE
	2644	ATP synthase gamma chain (EC 3.6.3.14)	100	100	100	100	100	100	100	CORE
	2646	ATP synthase delta chain (EC 3.6.3.14)	100	100	100	100	100	100	100	CORE
	2647	ATP synthase F0 sector subunit b (EC 3.6.3.14)	100	100	100	100	100	100	100	CORE
	2648	ATP synthase F0 sector subunit c (EC 3.6.3.14)	100	100	100	100	100	100	100	CORE
	2649	ATP synthase F0 sector subunit a (EC 3.6.3.14)	100	100	100	100	100	100	100	CORE
	2652	Chromosome (plasmid) partitioning protein ParA	100	100	100	100	100	100	100	CORE
	2653	16S rRNA (guanine(527)-N(7))-methyltransferase (EC 2.1.1.170)	100	100	100	100	100	100	100	CORE
	2656	Methyltransferase type 12	100	100	100	100	100	100	100	CORE
	2660	Magnesium and cobalt transport protein CorA	100	100	100	100	100	100	100	CORE
	2662	ADP-ribosylation/Crystallin J1	100	100	100	100	100	100	100	CORE
	2666	hypothetical protein	100	100	100	100	100	100	100	CORE
	2671	SMP-30/Gluconolaconase/LRE domain protein	100	100	100	100	100	100	100	CORE
	2672	hypothetical protein	100	100	100	100	100	100	100	CORE
	2673	hypothetical protein	100	100	100	100	100	100	100	CORE
	2677	Ferredoxin, 2Fe-2S	100	100	100	100	100	100	100	CORE
	2678	2-polyprenyl-3-methyl-6-methoxy-1,4-benzoquinol hydroxylase, coq7 type	100	100	100	100	100	100	100	CORE
	2680	Protein YhfA	100	100	100	100	100	100	100	CORE
	2681	Indole-3-glycerol phosphate synthase (EC 4.1.1.48)	100	100	100	100	100	100	100	CORE
	2682	Anthranilate phosphoribosyltransferase (EC 2.4.2.18)	100	100	100	100	100	100	100	CORE
	2685	Phosphoglycolate phosphatase (EC 3.1.3.18)	100	100	100	100	100	100	100	CORE
	2687	Fructose-bisphosphate aldolase class II (EC 4.1.2.13)	100	100	100	100	100	100	100	CORE
	2690	NAD-dependent glyceraldehyde-3-phosphate dehydrogenase (EC 1.2.1.12)	100	100	100	100	100	100	100	CORE
	2691	Transketolase (EC 2.2.1.1)	100	100	100	100	100	100	100	CORE
	2693	Inositol-1-monophosphatase (EC 3.1.3.25)	100	100	100	100	100	100	100	CORE
	2700	RND efflux system, inner membrane transporter	100	100	100	100	100	100	100	CORE
	2703	hypothetical protein	100	100	100	100	100	100	100	CORE
	2704	Protein YaiI	100	100	100	100	100	100	100	CORE
	2707	hypothetical protein	100	100	100	100	100	100	100	CORE
	2711	hypothetical protein	100	100	100	100	100	100	100	CORE
	2713	Osmolarity sensory histidine kinase EnvZ	100	100	100	100	100	100	100	CORE
	2714	hypothetical protein	100	100	100	100	100	100	100	CORE
	2716	hypothetical protein	100	100	100	100	100	100	100	CORE
	2717	Diaminopimelate decarboxylase (EC 4.1.1.20)	100	100	100	100	100	100	100	CORE
	2718	hypothetical protein	100	100	100	100	100	100	100	CORE
	2719	HoxW-like protein	100	100	100	100	100	100	100	CORE
	2721	Uptake [NiFe] hydrogenase, small subunit HyaA (EC 1.12.99.6)	100	100	100	100	100	100	100	CORE
	2722	hypothetical protein	100	100	100	100	100	100	100	CORE
	2723	DsrK-like protein	100	100	100	100	100	100	100	CORE
	2728	[NiFe] hydrogenase metallocenter assembly protein HypD	100	100	100	100	100	100	100	CORE
	2733	Glucose-1-phosphate thymidylyltransferase (EC 2.7.7.24)	100	100	100	100	100	100	100	CORE
	2736	Porphobilinogen synthase (EC 4.2.1.24)	100	100	100	100	100	100	100	CORE
	2740	HIT family protein	100	100	100	100	100	100	100	CORE
	2741	Glutamate-1-semialdehyde 2,1-aminomutase (EC 5.4.3.8)	100	100	100	100	100	100	100	CORE
	2742	Thiamin-phosphate pyrophosphorylase (EC 2.5.1.3)	100	100	100	100	100	100	100	CORE
	2750	FIG003879: Uncharacterized subgroup of the nitrilase superfamily	100	100	100	100	100	100	100	CORE
	2754	Lipoprotein signal peptidase (EC 3.4.23.36)	100	100	100	100	100	100	100	CORE
	2762	Guanylate kinase (EC 2.7.4.8)	100	100	100	100	100	100	100	CORE
	2765	RidA/YER057c/UK114 superfamily protein	100	100	100	100	100	100	100	CORE
	2766	hypothetical protein	100	100	100	100	100	100	100	CORE
	2767	ATP-dependent DNA helicase RecG (EC 3.6.4.12)	100	100	100	100	100	100	100	CORE
	2769	Protoporphyrinogen IX oxidase, aerobic, HemY (EC 1.3.3.4)	100	100	100	100	100	100	100	CORE
	2770	Putative permease often clustered with de novo purine synthesis	100	100	100	100	100	100	100	CORE
	2772	COG2078: Uncharacterized ACR	100	100	100	100	100	100	100	CORE
	2778	hypothetical protein	100	100	100	100	100	100	100	CORE
	2822	hypothetical protein	100	100	100	100	100	100	100	CORE
	2835	hypothetical protein	100	100	100	100	100	100	100	CORE
	2836	DEAD-box ATP-dependent RNA helicase DeaD (= CshA) (EC 3.6.4.13)	100	100	100	100	100	100	100	CORE
	2841	Phospholipid N-methyltransferase	100	100	100	100	100	100	100	CORE
	2842	hypothetical protein	100	100	100	100	100	100	100	CORE
	2844	Phosphate starvation-inducible protein PhoH, predicted ATPase	100	100	100	100	100	100	100	CORE
	2845	Metal-dependent hydrolase YbeY, involved in rRNA and/or ribosome maturation and assembly	100	100	100	100	100	100	100	CORE
	2847	Apolipoprotein N-acyltransferase / Copper homeostasis protein CutE	100	100	100	100	100	100	100	CORE
	2852	Zinc ABC transporter, permease protein ZnuB	100	100	100	100	100	100	100	CORE
	2855	hypothetical protein	100	100	100	100	100	100	100	CORE
	2856	NAD-dependent epimerase/dehydratase	100	100	100	100	100	100	100	CORE
	2862	Mlr3248 protein	100	100	100	100	100	100	100	CORE
	2863	Glycosyl transferase, group 1	100	100	100	100	100	100	100	CORE
	2865	Lipid A export permease/ATP-binding protein MsbA	100	100	100	100	100	100	100	CORE
	2866	UDP-glucose 6-dehydrogenase (EC 1.1.1.22)	100	100	100	100	100	100	100	CORE
	2867	hypothetical protein	100	100	100	100	100	100	100	CORE
	2868	Phosphoglycerate mutase family protein	100	100	100	100	100	100	100	CORE
	2871	SAM-dependent methyltransferase YafE (UbiE paralog)	100	100	100	100	100	100	100	CORE
	2873	hypothetical protein	100	100	100	100	100	100	100	CORE
	2874	3-isopropylmalate dehydratase small subunit (EC 4.2.1.33)	100	100	100	100	100	100	100	CORE
	2877	Ribose 5-phosphate isomerase A (EC 5.3.1.6)	100	100	100	100	100	100	100	CORE
	2880	Cytochrome O ubiquinol oxidase subunit II (EC 1.10.3.-)	100	100	100	100	100	100	100	CORE
	2899	Molybdopterin-synthase adenylyltransferase (EC 2.7.7.80)	100	100	100	100	100	100	100	CORE
	2907	Uncharacterized UPF0118 membrane protein	100	100	100	100	100	100	100	CORE
	2909	Dihydroxy-acid dehydratase (EC 4.2.1.9)	100	100	100	100	100	100	100	CORE
	2913	YciL protein	100	100	100	100	100	100	100	CORE
	2914	Intracellular septation protein IspA	100	100	100	100	100	100	100	CORE
	2920	Cysteine desulfurase (EC 2.8.1.7) => IscS	100	100	100	100	100	100	100	CORE
	2922	Iron-sulfur cluster assembly iron binding protein IscA	100	100	100	100	100	100	100	CORE
	2925	Ferredoxin, 2Fe-2S	100	100	100	100	100	100	100	CORE
	2926	Protein IscX, believed to be involved in assembly of Fe-S clusters	100	100	100	100	100	100	100	CORE
	2928	FIG00613342: Bacterial patatin-like phospholipase domain containing protein	100	100	100	100	100	100	100	CORE
	2930	Type I restriction-modification system, restriction subunit R (EC 3.1.21.3)	100	100	100	100	100	100	100	CORE
	2931	Type I restriction-modification system, DNA-methyltransferase subunit M (EC 2.1.1.72)	100	100	100	100	100	100	100	CORE
	2932	Putative DNA-binding protein in cluster with Type I restriction-modification system	100	100	100	100	100	100	100	CORE
	2942	S-(hydroxymethyl)glutathione dehydrogenase (EC 1.1.1.284)	100	100	100	100	100	100	100	CORE
	2945	Hydrogenase transcriptional regulatory protein HoxA	100	100	100	100	100	100	100	CORE
	2948	hypothetical protein	100	100	100	100	100	100	100	CORE
	2951	hypothetical protein	100	100	100	100	100	100	100	CORE
	2952	hypothetical protein	100	100	100	100	100	100	100	CORE
	2953	hypothetical protein	100	100	100	100	100	100	100	CORE
	2954	hypothetical protein	100	100	100	100	100	100	100	CORE
	2960	[NiFe] hydrogenase metallocenter assembly protein HypD	100	100	100	100	100	100	100	CORE
	2966	hypothetical protein	100	100	100	100	100	100	100	CORE
	2968	DNA-binding domain of ModE	100	100	100	100	100	100	100	CORE
	2970	hypothetical protein	100	100	100	100	100	100	100	CORE
	2972	Putative hemolysin	100	100	100	100	100	100	100	CORE
	2974	Uroporphyrinogen III decarboxylase (EC 4.1.1.37)	100	100	100	100	100	100	100	CORE
	2976	Glutamate synthase [NADPH] large chain (EC 1.4.1.13)	100	100	100	100	100	100	100	CORE
	2977	dNTP triphosphohydrolase, broad substrate specificity, subgroup 2	100	100	100	100	100	100	100	CORE
	2987	tRNA-specific adenosine-34 deaminase (EC 3.5.4.33)	100	100	100	100	100	100	100	CORE
	2991	Acetolactate synthase large subunit (EC 2.2.1.6)	100	100	100	100	100	100	100	CORE
	2993	Ketol-acid reductoisomerase (NADP(+)) (EC 1.1.1.86)	100	100	100	100	100	100	100	CORE
	2998	NADPH-dependent 7-cyano-7-deazaguanine reductase (EC 1.7.1.13)	100	100	100	100	100	100	100	CORE
	3002	Phosphoserine phosphatase (EC 3.1.3.3)	100	100	100	100	100	100	100	CORE
	3006	Putative predicted metal-dependent hydrolase	100	100	100	100	100	100	100	CORE
	3010	Uncharacterized UPF0721 integral membrane protein	100	100	100	100	100	100	100	CORE
	3011	hypothetical protein	100	100	100	100	100	100	100	CORE
	3023	Xanthine dehydrogenase iron-sulfur subunit (EC 1.17.1.4)	100	100	100	100	100	100	100	CORE
	3025	Ureidoglycolate lyase (EC 4.3.2.3)	100	100	100	100	100	100	100	CORE
	3026	hypothetical protein	100	100	100	100	100	100	100	CORE
	3028	hypothetical protein	100	100	100	100	100	100	100	CORE
	3029	Asp-tRNAAsn/Glu-tRNAGln amidotransferase A subunit and related amidases	100	100	100	100	100	100	100	CORE
	3036	FIG022199: FAD-binding protein	100	100	100	100	100	100	100	CORE
	3038	FIG018329: 1-acyl-sn-glycerol-3-phosphate acyltransferase	100	100	100	100	100	100	100	CORE
	3041	3-oxoacyl-[ACP] reductase (EC 1.1.1.100)	100	100	100	100	100	100	100	CORE
	3044	3-oxoacyl-[ACP] synthase (EC 2.3.1.41) FabV like	100	100	100	100	100	100	100	CORE
	3049	FIGfam138462: Acyl-CoA synthetase, AMP-(fatty) acid ligase	100	100	100	100	100	100	100	CORE
	3051	hypothetical protein	100	100	100	100	100	100	100	CORE
	3053	Penicillin amidase( EC:3.5.1.11 )	100	100	100	100	100	100	100	CORE
	3057	hypothetical protein	100	100	100	100	100	100	100	CORE
	3063	hypothetical protein	100	100	100	100	100	100	100	CORE
	3068	hypothetical protein	100	100	100	100	100	100	100	CORE
	3076	Integrase/recombinase, RitC	100	100	100	100	100	100	100	CORE
	1582	alpha-2-macroglobulin domain protein	100	100	100	100	100	99.93	100	CORE
	2174	GTP-binding protein TypA/BipA	100	100	100	100	100	99.83	100	CORE
	2043	Phenylalanyl-tRNA synthetase beta chain (EC 6.1.1.20)	100	100	100	100	100	99.83	100	CORE
	325	Glucans biosynthesis glucosyltransferase H (EC 2.4.1.-)	100	100	100	100	100	99.83	100	CORE
	2110	Oligoendopeptidase F (EC 3.4.24.-)	100	100	100	100	100	99.81	100	CORE
	2967	Threonine dehydratase biosynthetic (EC 4.3.1.19)	100	100	100	100	100	99.79	100	CORE
	2684	Anthranilate synthase, aminase component (EC 4.1.3.27)	100	100	100	100	100	99.79	100	CORE
	2975	Glutamate synthase [NADPH] small chain (EC 1.4.1.13)	100	100	100	100	100	99.78	100	CORE
	2933	Type I restriction-modification system, specificity subunit S	100	100	100	100	100	99.78	100	CORE
	2848	TldE protein, part of TldE/TldD proteolytic complex	100	100	100	100	100	99.78	100	CORE
	3003	DNA ligase (NAD(+)) (EC 6.5.1.2)	100	100	100	100	100	99.77	100	CORE
	1064	Nitrogenase (molybdenum-iron)-specific transcriptional regulator NifA	100	100	100	100	100	99.76	100	CORE
	978	Exopolyphosphatase (EC 3.6.1.11)	100	100	100	100	100	99.76	100	CORE
	2376	Cation-transporting ATPase	100	100	100	100	100	99.75	100	CORE
	775	DNA-directed RNA polymerase beta subunit (EC 2.7.7.6)	100	100	100	100	100	99.75	100	CORE
	2906	NADP-dependent malic enzyme (EC 1.1.1.40)	100	100	100	100	100	99.74	100	CORE
	1480	Hydrogenase-4 component F	100	100	100	100	100	99.74	100	CORE
	931	L-aspartate oxidase (EC 1.4.3.16)	100	100	100	100	100	99.74	100	CORE
	926	hypothetical protein	100	100	100	100	100	99.74	100	CORE
	924	hypothetical protein	100	100	100	100	100	99.74	100	CORE
	1276	GTP-binding protein EngA	100	100	100	100	100	99.73	100	CORE
	2558	Sulfate adenylyltransferase subunit 1 (EC 2.7.7.4)	100	100	100	100	100	99.72	100	CORE
	2534	DNA polymerase X	100	100	100	100	100	99.72	100	CORE
	2069	Ribonucleotide reductase of class Ia (aerobic), alpha subunit (EC 1.17.4.1)	100	100	100	100	100	99.72	100	CORE
	1784	DNA repair protein RecN	100	100	100	100	100	99.72	100	CORE
	2715	Argininosuccinate lyase (EC 4.3.2.1)	100	100	100	100	100	99.71	100	CORE
	2450	Phosphoenolpyruvate-protein phosphotransferase of PTS system (EC 2.7.3.9)	100	100	100	100	100	99.71	100	CORE
	1706	Type I restriction-modification system, restriction subunit R (EC 3.1.21.3)	100	100	100	100	100	99.71	100	CORE
	1683	Adenylosuccinate lyase (EC 4.3.2.2) @ SAICAR lyase (EC 4.3.2.2)	100	100	100	100	100	99.71	100	CORE
	1404	Aspartate-semialdehyde dehydrogenase (EC 1.2.1.11)	100	100	100	100	100	99.71	100	CORE
	1194	Glucose-methanol-choline (GMC) oxidoreductase:NAD binding site	100	100	100	100	100	99.71	100	CORE
	1153	Phosphoenolpyruvate synthase (EC 2.7.9.2)	100	100	100	100	100	99.71	100	CORE
	314	Aldehyde dehydrogenase (EC 1.2.1.3); Probable coniferyl aldehyde dehydrogenase (EC 1.2.1.68)	100	100	100	100	100	99.71	100	CORE
	2338	Large protein containing transglutaminase-like domain	100	100	100	100	100	99.69	100	CORE
	1163	Membrane-bound lytic murein transglycosylase B	100	100	100	100	100	99.69	100	CORE
	867	Transaldolase (EC 2.2.1.2)	100	100	100	100	100	99.69	100	CORE
	2181	ATP-dependent hsl protease ATP-binding subunit HslU	100	100	100	100	100	99.68	100	CORE
	1663	RNA polymerase sigma factor RpoD	100	100	100	100	100	99.68	100	CORE
	1481	Hydrogenase-4 component G	100	100	100	100	100	99.68	100	CORE
	1138	Pyruvate kinase (EC 2.7.1.40)	100	100	100	100	100	99.68	100	CORE
	1697	Type I restriction-modification system, DNA-methyltransferase subunit M (EC 2.1.1.72)	100	100	100	100	100	99.67	100	CORE
	1405	3-isopropylmalate dehydrogenase (EC 1.1.1.85)	100	100	100	100	100	99.67	100	CORE
	1028	ABC transporter, permease protein (cluster 8, B12/iron complex)	100	100	100	100	100	99.67	100	CORE
	2442	Capsular polysaccharide biosynthesis fatty acid synthase WcbR	100	100	100	100	100	99.66	100	CORE
	1694	outer membrane efflux protein	100	100	100	100	100	99.66	100	CORE
	713	hypothetical protein	100	100	100	100	100	99.66	100	CORE
	1391	S-adenosylmethionine:tRNA ribosyltransferase-isomerase (EC 2.4.99.17)	100	100	100	100	100	99.65	100	CORE
	1368	hypothetical protein	100	100	100	100	100	99.64	100	CORE
	2158	Uncharacterized protease YhbU	100	100	100	100	100	99.63	100	CORE
	1390	Queuine tRNA-ribosyltransferase (EC 2.4.2.29)	100	100	100	100	100	99.62	100	CORE
	1363	Topoisomerase IV subunit A (EC 5.99.1.-)	100	100	100	100	100	99.62	100	CORE
	631	Transcriptional regulator, LysR family	100	100	100	100	100	99.62	100	CORE
	1764	Outer membrane beta-barrel assembly protein BamD	100	100	100	100	100	99.61	100	CORE
	3022	Xanthine dehydrogenase, molybdenum binding subunit (EC 1.17.1.4)	100	100	100	100	100	99.6	100	CORE
	2497	Glutathione synthetase (EC 6.3.2.3)	100	100	100	100	100	99.6	100	CORE
	1489	hypothetical protein	100	100	100	100	100	99.6	100	CORE
	994	Oxidoreductase	100	100	100	100	100	99.6	100	CORE
	2712	Two-component system response regulator OmpR	100	100	100	100	100	99.59	100	CORE
	2479	Phosphoribosylformimino-5-aminoimidazole carboxamide ribotide isomerase (EC 5.3.1.16)	100	100	100	100	100	99.59	100	CORE
	958	Ser/Thr protein phosphatase family protein, UDP-2,3-diacylglucosamine hydrolase (EC 3.6.1.-) homolog	100	100	100	100	100	99.58	100	CORE
	2939	sigma-54-dependent transcriptional regulator	100	100	100	100	100	99.57	100	CORE
	2005	Lipoyl synthase (EC 2.8.1.8)	100	100	100	100	100	99.57	100	CORE
	1792	Leucyl-tRNA synthetase (EC 6.1.1.4)	100	100	100	100	100	99.57	100	CORE
	1634	TonB domain protein	100	100	100	100	100	99.57	100	CORE
	707	Arginyl-tRNA--protein transferase (EC 2.3.2.8)	100	100	100	100	100	99.57	100	CORE
	654	Ribosomal protein L11 methyltransferase	100	100	100	100	100	99.57	100	CORE
	263	D-3-phosphoglycerate dehydrogenase (EC 1.1.1.95)	100	100	100	100	100	99.57	100	CORE
	2758	Proposed peptidoglycan lipid II flippase MurJ	100	100	100	100	100	99.56	100	CORE
	2050	NADH-ubiquinone oxidoreductase chain M (EC 1.6.5.3)	100	100	100	100	100	99.56	100	CORE
	941	Pyridoxine 5'-phosphate synthase (EC 2.6.99.2)	100	100	100	100	100	99.56	100	CORE
	1017	Electron transfer flavoprotein, beta subunit FixA	100	100	100	100	100	99.55	100	CORE
	2127	Membrane-fusion protein	100	100	100	100	100	99.54	100	CORE
	2904	Transcription termination factor Rho	100	100	100	100	100	99.53	100	CORE
	2283	tRNA (guanine(37)-N(1))-methyltransferase (EC 2.1.1.228)	100	100	100	100	100	99.53	100	CORE
	1955	NLP/P60 protein	100	100	100	100	100	99.53	100	CORE
	1211	RecA/RadA recombinase	100	100	100	100	100	99.53	100	CORE
	2737	Uroporphyrinogen-III synthase (EC 4.2.1.75)	100	100	100	100	100	99.52	100	CORE
	1617	Uncharacterized protein Atu0170, clustered with phosphonate utilization	100	100	100	100	100	99.51	100	CORE
	341	Aminomethyltransferase (glycine cleavage system T protein) (EC 2.1.2.10)	100	100	100	100	100	99.51	100	CORE
	2761	Protein YicC	100	100	100	100	100	99.5	100	CORE
	2157	Uncharacterized peptidase U32 family member YhbV	100	100	100	100	100	99.5	100	CORE
	1958	Ferrous iron transport protein B	100	100	100	100	100	99.49	100	CORE
	1834	hypothetical protein	100	100	100	100	100	99.49	100	CORE
	1152	2,3-bisphosphoglycerate-independent phosphoglycerate mutase (EC 5.4.2.12)	100	100	100	100	100	99.49	100	CORE
	2748	Chromosomal replication initiator protein DnaA	100	100	100	100	100	99.48	100	CORE
	2738	Porphobilinogen deaminase (EC 2.5.1.61)	100	100	100	100	100	99.48	100	CORE
	1805	Glutamate-pyruvate aminotransferase AlaC (EC 2.6.1.2)	100	100	100	100	100	99.48	100	CORE
	1157	2,3,4,5-tetrahydropyridine-2,6-dicarboxylate N-succinyltransferase (EC 2.3.1.117)	100	100	100	100	100	99.47	100	CORE
	912	FolM Alternative dihydrofolate reductase 1	100	100	100	100	100	99.47	100	CORE
	591	FolM Alternative dihydrofolate reductase 1	100	100	100	100	100	99.47	100	CORE
	2941	Glutathione-dependent formaldehyde-activating enzyme (EC 4.4.1.22)	100	100	100	100	100	99.46	100	CORE
	1406	Molybdenum cofactor guanylyltransferase (EC 2.7.7.77)	100	100	100	100	100	99.46	100	CORE
	683	Glutamate N-acetyltransferase (EC 2.3.1.35) @ N-acetylglutamate synthase (EC 2.3.1.1)	100	100	100	100	100	99.46	100	CORE
	2973	1-acyl-sn-glycerol-3-phosphate acyltransferase( EC:2.3.1.51 )	100	100	100	100	100	99.45	100	CORE
	2732	dTDP-4-dehydrorhamnose 3,5-epimerase (EC 5.1.3.13)	100	100	100	100	100	99.45	100	CORE
	1818	Ferric siderophore transport system, biopolymer transport protein ExbB	100	100	100	100	100	99.45	100	CORE
	1555	hypothetical protein	100	100	100	100	100	99.45	100	CORE
	934	HtrA protease/chaperone protein	100	100	100	100	100	99.45	100	CORE
	1375	Nitrite reductase (NO-forming)( EC:1.7.2.1 )	100	100	100	100	100	99.43	100	CORE
	2549	hypothetical protein	100	100	100	100	100	99.42	100	CORE
	2034	hypothetical protein	100	100	100	100	100	99.42	100	CORE
	601	ADP-heptose synthase (EC 2.7.-.-) / D-glycero-beta-D-manno-heptose 7-phosphate kinase	100	100	100	100	100	99.42	100	CORE
	219	Translation elongation factor P	100	100	100	100	100	99.42	100	CORE
	2927	tRNA-specific 2-thiouridylase MnmA (EC 2.8.1.13)	100	100	100	100	100	99.41	100	CORE
	2522	Ion transport 2 domain protein	100	100	100	100	100	99.41	100	CORE
	1273	Histidyl-tRNA synthetase (EC 6.1.1.21)	100	100	100	100	100	99.41	100	CORE
	636	Glutathione S-transferase family protein	100	100	100	100	100	99.41	100	CORE
	2474	ATP phosphoribosyltransferase (EC 2.4.2.17) => HisGs	100	100	100	100	100	99.4	100	CORE
	715	Acetylglutamate kinase (EC 2.7.2.8)	100	100	100	100	100	99.4	100	CORE
	2756	FMN adenylyltransferase (EC 2.7.7.2) / Riboflavin kinase (EC 2.7.1.26)	100	100	100	100	100	99.39	100	CORE
	2201	putative endonuclease	100	100	100	100	100	99.39	100	CORE
	1606	SMP-30/Gluconolaconase/LRE domain protein	100	100	100	100	100	99.39	100	CORE
	1407	Molybdopterin-guanine dinucleotide biosynthesis protein MobB	100	100	100	100	100	99.39	100	CORE
	261	DNA gyrase subunit A (EC 5.99.1.3)	100	100	100	100	100	99.39	100	CORE
	986	Phosphatidate cytidylyltransferase (EC 2.7.7.41)	100	100	100	100	100	99.38	100	CORE
	930	tRNA-modifying protein YgfZ	100	100	100	100	100	99.38	100	CORE
	1635	TonB-dependent receptor	100	100	100	100	100	99.37	100	CORE
	1477	Hydrogenase-4 component B	100	100	100	100	100	99.37	100	CORE
	1101	hypothetical protein	100	100	100	100	100	99.37	100	CORE
	726	Hopene-associated glycosyltransferase HpnB	100	100	100	100	100	99.36	100	CORE
	2403	Sulfate adenylyltransferase subunit 2 (EC 2.7.7.4)	100	100	100	100	100	99.35	100	CORE
	2279	protease Do	100	100	100	100	100	99.35	100	CORE
	976	Phosphate transport ATP-binding protein PstB (TC 3.A.1.7.1)	100	100	100	100	100	99.35	100	CORE
	2250	Replicative DNA helicase (DnaB) (EC 3.6.4.12)	100	100	100	100	100	99.34	100	CORE
	3046	FIG021862: membrane protein, exporter	100	100	100	100	100	99.33	100	CORE
	1533	Na+/H+ antiporter NhaA type	100	100	100	100	100	99.33	100	CORE
	1505	Agmatine deiminase (EC 3.5.3.12)	100	100	100	100	100	99.33	100	CORE
	2237	NADPH-dependent FMN reductase	100	100	100	100	100	99.32	100	CORE
	773	LSU ribosomal protein L10p (P0)	100	100	100	100	100	99.32	100	CORE
	1846	Oxidoreductase	100	100	100	100	100	99.31	100	CORE
	1590	IMP cyclohydrolase (EC 3.5.4.10) / Phosphoribosylaminoimidazolecarboxamide formyltransferase (EC 2.1.2.3)	100	100	100	100	100	99.31	100	CORE
	961	Glycosyltransferase	100	100	100	100	100	99.31	100	CORE
	2342	UPF0229 protein YeaH	100	100	100	100	100	99.29	100	CORE
	709	Ribonuclease T	100	100	100	100	100	99.29	100	CORE
	1629	Acid phosphatase (EC 3.1.3.2)	100	100	100	100	100	99.28	100	CORE
	1625	hypothetical protein	100	100	100	100	100	99.28	100	CORE
	938	Ribonuclease III (EC 3.1.26.3)	100	100	100	100	100	99.28	100	CORE
	760	3,4-dihydroxy-2-butanone 4-phosphate synthase (EC 4.1.99.12) / GTP cyclohydrolase II (EC 3.5.4.25)	100	100	100	100	100	99.28	100	CORE
	2679	hypothetical protein	100	100	100	100	100	99.27	100	CORE
	2022	1,6-anhydro-N-acetylmuramyl-L-alanine amidase	100	100	100	100	100	99.26	100	CORE
	1816	hypothetical protein	100	100	100	100	100	99.26	100	CORE
	1085	Uncharacterized MFS-type transporter	100	100	100	100	100	99.26	100	CORE
	798	SSU ribosomal protein S5p (S2e)	100	100	100	100	100	99.26	100	CORE
	1878	OmpA/MotB domain protein	100	100	100	100	100	99.25	100	CORE
	1229	HflK protein	100	100	100	100	100	99.25	100	CORE
	2731	Mannose-1-phosphate guanylyltransferase (EC 2.7.7.13) / Mannose-6-phosphate isomerase (EC 5.3.1.8)	100	100	100	100	100	99.24	100	CORE
	1980	Uncharacterized radical-SAM-domain protein HTH_1873	100	100	100	100	100	99.24	100	CORE
	1950	Peptide chain release factor 3	100	100	100	100	100	99.24	100	CORE
	2938	Putative formate dehydrogenase oxidoreductase protein	100	100	100	100	100	99.23	100	CORE
	1387	Protein translocase subunit SecF	100	100	100	100	100	99.23	100	CORE
	640	Anhydro-N-acetylmuramic acid kinase (EC 2.7.1.170)	100	100	100	100	100	99.22	100	CORE
	1427	protein of unknown function DUF181	100	100	100	100	100	99.21	100	CORE
	2068	TldD protein, part of TldE/TldD proteolytic complex	100	100	100	100	100	99.2	100	CORE
	344	Glycine dehydrogenase [decarboxylating] (glycine cleavage system P2 protein) (EC 1.4.4.2)	100	100	100	100	100	99.19	100	CORE
	3070	Type I restriction-modification system, DNA-methyltransferase subunit M (EC 2.1.1.72)	100	100	100	100	100	99.17	100	CORE
	2465	Nucleotidyl transferase possibly involved in threonylcarbamoyladenosine formation	100	100	100	100	100	99.17	100	CORE
	2272	Glutamate racemase (EC 5.1.1.3)	100	100	100	100	100	99.17	100	CORE
	1619	Transcriptional regulator PhnF	100	100	100	100	100	99.17	100	CORE
	816	Uncharacterized protein HTH_1884	100	100	100	100	100	99.17	100	CORE
	2452	PTS system, IIA component	100	100	100	100	100	99.16	100	CORE
	762	Transcription termination protein NusB	100	100	100	100	100	99.14	100	CORE
	724	Twitching motility protein PilT	100	100	100	100	100	99.14	100	CORE
	2036	hypothetical protein	100	100	100	100	100	99.13	100	CORE
	2400	Glycosyl transferase, group 1	100	100	100	100	100	99.12	100	CORE
	1350	4-carboxymuconolactone decarboxylase domain/alkylhydroperoxidase AhpD family core domain protein	100	100	100	100	100	99.12	100	CORE
	1248	Malonyl CoA-acyl carrier protein transacylase (EC 2.3.1.39)	100	100	100	100	100	99.12	100	CORE
	1123	hypothetical protein	100	100	100	100	100	99.12	100	CORE
	2992	Acetolactate synthase small subunit (EC 2.2.1.6)	100	100	100	100	100	99.11	100	CORE
	694	Protein tyrosine phosphatase	100	100	100	100	100	99.11	100	CORE
	2381	Nicotinate-nucleotide adenylyltransferase (EC 2.7.7.18)	100	100	100	100	100	99.1	100	CORE
	2645	ATP synthase alpha chain (EC 3.6.3.14)	100	100	100	100	100	99.07	100	CORE
	1600	Biopolymer transport protein ExbD/TolR	100	100	100	100	100	99.07	100	CORE
	1023	Biopolymer transport protein ExbD/TolR	100	100	100	100	100	99.07	100	CORE
	971	Phosphate regulon transcriptional regulatory protein PhoB (SphR)	100	100	100	100	100	99.07	100	CORE
	658	Transcriptional regulator, HxlR family	100	100	100	100	100	99.07	100	CORE
	2407	Capsular polysaccharide biosynthesis/export periplasmic protein WcbC	100	100	100	100	100	99.05	100	CORE
	770	Transcription antitermination protein NusG	100	100	100	100	100	99.04	100	CORE
	2640	Glutamine--fructose-6-phosphate aminotransferase [isomerizing] (EC 2.6.1.16)	100	100	100	100	100	99.02	100	CORE
	2946	Uptake [NiFe] hydrogenase, small subunit HyaA (EC 1.12.99.6)	100	100	100	100	100	99.01	100	CORE
	2480	Imidazole glycerol phosphate synthase cyclase subunit HisF	100	100	100	100	100	99.01	100	CORE
	276	ATP-dependent Clp protease proteolytic subunit (EC 3.4.21.92)	100	100	100	100	100	99.01	100	CORE
	221	Excinuclease ABC subunit C	100	100	100	100	100	99.01	100	CORE
	2739	putative comEA-related protein	100	100	100	100	100	99	100	CORE
	1594	Dihydroorotate dehydrogenase (quinone) (EC 1.3.5.2)	100	100	100	100	100	98.99	100	CORE
	675	Cell division protein MraZ	100	100	100	100	100	98.98	100	CORE
	1525	Protein of unknown function DUF55	100	100	100	100	100	98.97	100	CORE
	254	protein of unknown function DUF74	100	100	100	100	100	98.97	100	CORE
	2457	RNA polymerase sigma-54 factor RpoN	100	100	100	100	100	98.96	100	CORE
	3035	Polysaccharide deacetylase	100	100	100	100	100	98.95	100	CORE
	693	Lipopolysaccharide core heptosyltransferase I	100	100	100	100	100	98.95	100	CORE
	312	Putative membrane-spanning protein	100	100	100	100	100	98.95	100	CORE
	1015	Electron transfer flavoprotein-quinone oxidoreductase FixC	100	100	100	100	100	98.94	100	CORE
	2934	hypothetical protein	100	100	100	100	100	98.89	100	CORE
	1801	5'-nucleotidase SurE (EC 3.1.3.5)	100	100	100	100	100	98.89	100	CORE
	2980	Shikimate kinase I (EC 2.7.1.71)	100	100	100	100	100	98.88	100	CORE
	811	UPF0758 family protein	100	100	100	100	100	98.88	100	CORE
	2462	D-arabinose 5-phosphate isomerase (EC 5.3.1.13)	100	100	100	100	100	98.86	100	CORE
	2591	hypothetical protein	100	100	100	100	100	98.85	100	CORE
	2328	hypothetical protein	100	100	100	100	100	98.85	100	CORE
	1641	hypothetical protein	100	100	100	100	100	98.85	100	CORE
	1906	Potassium-transporting ATPase C chain (EC 3.6.3.12) (TC 3.A.3.7.1)	100	100	100	100	100	98.84	100	CORE
	357	MBL-fold metallo-hydrolase superfamily	100	100	100	100	100	98.84	100	CORE
	355	MBL-fold metallo-hydrolase superfamily	100	100	100	100	100	98.84	100	CORE
	2248	DNA repair protein RadA	100	100	100	100	100	98.83	100	CORE
	2249	Alanine racemase (EC 5.1.1.1)	100	100	100	100	100	98.82	100	CORE
	280	DNA-binding protein HU-beta	100	100	100	100	100	98.82	100	CORE
	656	Biotin carboxyl carrier protein of acetyl-CoA carboxylase	100	100	100	100	100	98.81	100	CORE
	1482	Formate hydrogenlyase subunit 7-like protein	100	100	100	100	100	98.8	100	CORE
	2950	Hydrogenase maturation protease	100	100	100	100	100	98.78	100	CORE
	1765	Ribosomal large subunit pseudouridine synthase D (EC 5.4.99.23)	100	100	100	100	100	98.78	100	CORE
	593	Membrane protein	100	100	100	100	100	98.78	100	CORE
	2413	Glycosyl transferase, group 1 family protein	100	100	100	100	100	98.77	100	CORE
	353	23S rRNA (guanosine(2251)-2'-O)-methyltransferase (EC 2.1.1.185)	100	100	100	100	100	98.77	100	CORE
	321	Phospholipase/carboxylesterase	100	100	100	100	100	98.77	100	CORE
	3030	hypothetical protein	100	100	100	100	100	98.75	100	CORE
	2864	Glycosyl transferase, group 1	100	100	100	100	100	98.75	100	CORE
	954	FIG032766: hypothetical protein	100	100	100	100	100	98.75	100	CORE
	1469	5-formyltetrahydrofolate cyclo-ligase (EC 6.3.3.2)	100	100	100	100	100	98.73	100	CORE
	990	Periplasmic chaperone of outer membrane proteins Skp @ Outer membrane protein H precursor	100	100	100	100	100	98.73	100	CORE
	2962	[NiFe] hydrogenase nickel incorporation protein HypA	100	100	100	100	100	98.72	100	CORE
	2519	Aspartate 1-decarboxylase (EC 4.1.1.11)	100	100	100	100	100	98.72	100	CORE
	1195	probable glucose 1-dehydrogenase	100	100	100	100	100	98.72	100	CORE
	3042	3-hydroxydecanoyl-[ACP] dehydratase (EC 4.2.1.59)	100	100	100	100	100	98.7	100	CORE
	1394	O-acetylhomoserine sulfhydrylase (EC 2.5.1.49) / O-succinylhomoserine sulfhydrylase (EC 2.5.1.48)	100	100	100	100	100	98.68	100	CORE
	1409	phosphatidylserine/phosphatidylglycerophosphate related protein	100	100	100	100	100	98.67	100	CORE
	1111	Inosine-5'-monophosphate dehydrogenase (EC 1.1.1.205) / CBS domain	100	100	100	100	100	98.67	100	CORE
	352	hypothetical protein	100	100	100	100	100	98.63	100	CORE
	2650	ATP synthase protein I	100	100	100	100	100	98.61	100	CORE
	336	Possible protease sohB (EC 3.4.21.-)	100	100	100	100	100	98.61	100	CORE
	1512	UspA domain protein	100	100	100	100	100	98.6	100	CORE
	1366	Two-component transcriptional response regulator, LuxR family	100	100	100	100	100	98.59	100	CORE
	1441	Aspartyl-tRNA(Asn) amidotransferase subunit C (EC 6.3.5.6) @ Glutamyl-tRNA(Gln) amidotransferase subunit C (EC 6.3.5.7)	100	100	100	100	100	98.55	100	CORE
	2959	Phosphoheptose isomerase 1 (EC 5.3.1.-)	100	100	100	100	100	98.53	100	CORE
	2325	hypothetical protein	100	100	100	100	100	98.53	100	CORE
	779	Translation elongation factor G	100	100	100	100	100	98.53	100	CORE
	2984	Type IV pilus biogenesis protein PilN	100	100	100	100	100	98.48	100	CORE
	2898	hypothetical protein	100	100	100	100	100	98.48	100	CORE
	2614	Putative transposase	100	100	100	100	100	98.48	100	CORE
	231	Transcriptional regulator, LysR family	100	100	100	100	100	98.48	100	CORE
	1539	NADH:flavin oxidoreductase/NADH oxidase	100	100	100	100	100	98.46	100	CORE
	771	LSU ribosomal protein L11p (L12e)	100	100	100	100	100	98.46	100	CORE
	1988	Heterodisulfide reductase subunit B like protein HTH_1882	100	100	100	100	100	98.45	100	CORE
	218	Cell division protein DivIC (FtsB), stabilizes FtsL against RasP cleavage	100	100	100	100	100	98.44	100	CORE
	2045	LSU ribosomal protein L20p	100	100	100	100	100	98.41	100	CORE
	1425	hypothetical protein	100	100	100	100	100	98.41	100	CORE
	1179	hypothetical protein	100	100	100	100	100	98.39	100	CORE
	1054	Nitrogenase FeMo-cofactor scaffold and assembly protein NifN	100	100	100	100	100	98.39	100	CORE
	1974	Lipoate-protein ligase A	100	100	100	100	100	98.36	100	CORE
	1903	hypothetical protein	100	100	100	100	100	98.36	100	CORE
	2499	Citrate synthase (si) (EC 2.3.3.1)	100	100	100	100	100	98.33	100	CORE
	1358	Phosphoribosylglycinamide formyltransferase 2 (EC 2.1.2.-)	100	100	100	100	100	98.33	100	CORE
	1148	Dihydrolipoamide acetyltransferase component of pyruvate dehydrogenase complex (EC 2.3.1.12)	100	100	100	100	100	98.33	100	CORE
	1451	Hopanoid-associated sugar epimerase HpnA	100	100	100	100	100	98.31	100	CORE
	1119	Glutamate 5-kinase (EC 2.7.2.11) / RNA-binding C-terminal domain PUA	100	100	100	100	100	98.31	100	CORE
	257	mRNA interferase RelE	100	100	100	100	100	98.31	100	CORE
	1492	hypothetical protein	100	100	100	100	100	98.28	100	CORE
	945	tRNA(Cytosine32)-2-thiocytidine synthetase	100	100	100	100	100	98.28	100	CORE
	1787	Biotin--protein ligase (EC 6.3.4.9)(EC 6.3.4.10)(EC 6.3.4.11)(EC 6.3.4.15)	100	100	100	100	100	98.22	100	CORE
	3045	Acyl carrier protein (ACP1)	100	100	100	100	100	98.21	100	CORE
	2042	Integration host factor alpha subunit	100	100	100	100	100	98.21	100	CORE
	1602	Two-component transcriptional response regulator, winged helix family	100	100	100	100	100	98.21	100	CORE
	1621	Phospholipase C (EC 3.1.4.3)	100	100	100	100	100	98.18	100	CORE
	1371	outer membrane efflux protein	100	100	100	100	100	98.16	100	CORE
	1444	Radical SAM protein required for addition of adenosine to hopane skeleton, HpnH	100	100	100	100	100	98.11	100	CORE
	702	Pimeloyl-[acyl-carrier protein] methyl ester esterase BioH (EC 3.1.1.85)	100	100	100	100	100	98.11	100	CORE
	1598	Acid phosphatase (EC 3.1.3.2)	100	100	100	100	100	98.1	100	CORE
	2882	Cytochrome O ubiquinol oxidase subunit III (EC 1.10.3.-)	100	100	100	100	100	98.08	100	CORE
	1865	Hypothetical protein VC0266 (sugar utilization related?)	100	100	100	100	100	98.08	100	CORE
	2675	Efflux ABC transporter, ATP-binding protein	100	100	100	100	100	98.04	100	CORE
	943	UDP-glucose 6-dehydrogenase (EC 1.1.1.22)	100	100	100	100	100	98.04	100	CORE
	324	hypothetical protein	100	100	100	100	100	98.04	100	CORE
	2327	hypothetical protein	100	100	100	100	100	98	100	CORE
	1090	Methylated-DNA--protein-cysteine methyltransferase (EC 2.1.1.63)	100	100	100	100	100	98	100	CORE
	1072	NifZ protein	100	100	100	100	100	98	100	CORE
	2725	[NiFe] hydrogenase nickel incorporation protein HypA	100	100	100	100	100	97.96	100	CORE
	1959	hypothetical protein	100	100	100	100	100	97.96	100	CORE
	1868	ATP-dependent Clp protease adaptor protein ClpS	100	100	100	100	100	97.87	100	CORE
	1181	Transketolase (EC 2.2.1.1)	100	100	100	100	100	97.87	100	CORE
	293	Hypothetical domain / Nicotinamide-nucleotide amidase (EC 3.5.1.42)	100	100	100	100	100	97.86	100	CORE
	3043	3-oxoacyl-[ACP] synthase	100	100	100	100	100	97.83	100	CORE
	1269	23S rRNA (adenine(2503)-C(2))-methyltransferase @ tRNA (adenine(37)-C(2))-methyltransferase (EC 2.1.1.192)	100	100	100	100	100	97.83	100	CORE
	548	Carboxysome shell protein CsoS1	100	100	100	100	100	97.83	100	CORE
	951	type I restriction-modification system, M subunit	100	100	100	100	100	97.78	100	CORE
	1032	ABC transporter, substrate-binding protein (cluster 8, B12/iron complex)	100	100	100	100	100	97.73	100	CORE
	2996	Pyruvate kinase family protein	100	100	100	100	100	97.58	100	CORE
	725	Type IV pilus assembly ATPase component PilU	100	100	100	100	100	97.55	100	CORE
	1069	hypothetical protein	100	100	100	100	100	97.53	100	CORE
	844	Peptidase, M16 family	100	100	100	100	100	97.47	100	CORE
	1433	RND efflux system, membrane fusion protein	100	100	100	100	100	97.44	100	CORE
	1164	hypothetical protein	100	100	100	100	100	97.44	100	CORE
	1984	Heterodisulfide reductase subunit B like protein HTH_1878	100	100	100	100	100	97.37	100	CORE
	790	LSU ribosomal protein L29p (L35e)	100	100	100	100	100	97.37	100	CORE
	1074	NifT protein	100	100	100	100	100	97.3	100	CORE
	251	hypothetical protein	100	100	100	100	100	97.3	100	CORE
	2982	Type IV pilus biogenesis protein PilP	100	100	100	100	100	97.25	100	CORE
	2879	hypothetical protein	100	100	100	100	100	97.22	100	CORE
	2875	hypothetical protein	100	100	100	100	100	97.14	100	CORE
	3048	Lysophospholipid acyltransferase	100	100	100	100	100	97.06	100	CORE
	2443	Palmitoyltransferase-like protein	100	100	100	100	100	97.05	100	CORE
	2134	hypothetical protein	100	100	100	100	100	96.97	100	CORE
	2823	hypothetical protein	100	100	100	100	100	96.83	100	CORE
	2779	hypothetical protein	100	100	100	100	100	96.83	100	CORE
	266	2-keto-3-deoxy-D-arabino-heptulosonate-7-phosphate synthase I beta (EC 2.5.1.54)	100	100	100	100	100	96.81	100	CORE
	2601	hypothetical protein	100	100	100	100	100	96.74	100	CORE
	1592	Threonylcarbamoyl-AMP synthase (EC 2.7.7.87)	100	100	100	100	100	96.57	100	CORE
	772	LSU ribosomal protein L1p (L10Ae)	100	100	100	100	100	96.46	100	CORE
	2074	DsrE family protein	100	100	100	100	100	96.43	100	CORE
	2699	hypothetical protein	100	100	100	100	100	96.23	100	CORE
	1186	hypothetical protein	100	100	100	100	100	96.19	100	CORE
	1184	putative C4-dicarboxylate transporter	100	100	100	100	100	96.15	100	CORE
	1408	Molybdopterin molybdenumtransferase (EC 2.10.1.1)	100	100	100	100	100	95.91	100	CORE
	992	3-hydroxyacyl-[acyl-carrier-protein] dehydratase, FabZ form (EC 4.2.1.59)	100	100	100	100	100	95.77	100	CORE
	267	Cyclohexadienyl dehydrogenase (EC 1.3.1.12)(EC 1.3.1.43)	100	100	100	100	100	95.56	100	CORE
	2433	Malate dehydrogenase (EC 1.1.1.37)	100	100	100	100	100	95.24	100	CORE
	286	High frequency lysogenization protein HflD	100	100	100	100	100	95.24	100	CORE
	2337	Protein containing domains DUF403	100	100	100	100	100	94.9	100	CORE
	1025	hypothetical protein	100	100	100	100	100	94.55	100	CORE
	2903	Thioredoxin	100	100	100	100	100	94.44	100	CORE
	2610	hypothetical protein	100	100	100	100	100	94.44	100	CORE
	1001	Dihydroorotase (EC 3.5.2.3)	100	100	100	100	100	94.12	100	CORE
	1170	hypothetical protein	100	100	100	100	100	93.94	100	CORE
	1043	Serine acetyltransferase (EC 2.3.1.30)	100	100	100	100	100	93.73	100	CORE
	819	Glutathione reductase (EC 1.8.1.7)	100	100	100	100	100	93.59	100	CORE
	2638	HMG-I and HMG-Y, DNA-binding	100	100	100	100	100	93.51	100	CORE
	3024	Xanthine dehydrogenase, FAD binding subunit (EC 1.17.1.4)	100	100	100	100	100	93.29	100	CORE
	2093	hypothetical protein	100	100	100	100	100	93.1	100	CORE
	277	ATP-dependent Clp protease ATP-binding subunit ClpX	100	100	100	100	100	93.07	100	CORE
	2414	Glycosyl transferase, group 1 family protein	100	100	100	100	100	92.68	100	CORE
	288	Methionine aminopeptidase (EC 3.4.11.18)	100	100	100	100	100	92.45	100	CORE
	2965	D-amino acid dehydrogenase (EC 1.4.99.6)	100	100	100	100	100	92	100	CORE
	2668	hypothetical protein	100	100	100	100	100	91.67	100	CORE
	3040	Na(+)/H(+) antiporter	100	100	100	100	100	91.11	100	CORE
	1655	Phosphoglucomutase (EC 5.4.2.2)	100	100	100	100	100	90.96	100	CORE
	2200	hypothetical protein	100	100	100	100	100	90.32	100	CORE
	1971	hypothetical protein	100	100	100	100	100	90.2	100	CORE
	306	DNA helicase, SNF2/RAD54 family	100	100	100	100	100	89.95	100	CORE
	1139	Fructose-bisphosphate aldolase, archaeal class I (EC 4.1.2.13)	100	100	100	100	100	89.66	100	CORE
	243	hypothetical protein	100	100	100	100	100	89.66	100	CORE
	1057	Ferredoxin	100	100	100	100	100	88.89	100	CORE
	1316	TonB family protein	100	100	100	100	100	87.01	100	CORE
	1044	Homocitrate synthase (EC 2.3.3.14)	100	100	100	100	100	85.28	100	CORE
	1487	Protein PhnA	100	100	100	100	100	83.33	100	CORE
	3047	FIG027190: Putative transmembrane protein	100	100	100	100	100	80.46	100	CORE
	822	Transcription-repair coupling factor	100	100	100	100	100	100	99.9	CORE
	1636	putative lipoprotein	100	100	100	100	100	99.8	99.89	CORE
	2517	plasma-membrane proton-efflux P-type ATPase	100	100	100	100	100	100	99.85	CORE
	1307	Acetyl-CoA synthetase (EC 6.2.1.1)	100	100	100	100	100	99.83	99.83	CORE
	1817	DNA internalization-related competence protein ComEC/Rec2	100	100	100	100	100	99.77	99.83	CORE
	1467	Putative protease	100	100	100	100	100	100	99.82	CORE
	998	DNA polymerase III alpha subunit (EC 2.7.7.7)	100	100	100	100	100	99.67	99.8	CORE
	2355	Glycosyl transferase, family 39	100	100	100	100	100	99.51	99.8	CORE
	3055	Periplasmic aromatic aldehyde oxidoreductase, molybdenum binding subunit YagR	100	100	100	100	100	100	99.79	CORE
	2333	Nitrogen regulation protein NR(I), GlnG (=NtrC)	100	100	100	100	100	99.75	99.79	CORE
	2964	Uncharacterized amino acid permease, GabP family	100	100	100	100	100	100	99.78	CORE
	1692	Acriflavin resistance protein	100	100	100	100	100	100	99.78	CORE
	1773	Amino acid-proton symporter related protein	100	100	100	100	100	100	99.77	CORE
	2485	Ribulose bisphosphate carboxylase large chain (EC 4.1.1.39)	100	100	100	100	100	100	99.76	CORE
	1312	1-deoxy-D-xylulose 5-phosphate synthase (EC 2.2.1.7)	100	100	100	100	100	100	99.76	CORE
	1296	Outer membrane component of TAM transport system	100	100	100	100	100	100	99.76	CORE
	766	Ubiquinone biosynthesis regulatory protein kinase UbiB	100	100	100	100	100	100	99.76	CORE
	1799	Glutamine synthetase type I (EC 6.3.1.2)	100	100	100	100	100	100	99.75	CORE
	1976	membrane protein involved in aromatic hydrocarbon degradation	100	100	100	100	100	99.68	99.75	CORE
	670	UDP-N-acetylmuramoyl-tripeptide--D-alanyl-D-alanine ligase (EC 6.3.2.10)	100	100	100	100	100	100	99.74	CORE
	749	5-methyltetrahydropteroyltriglutamate--homocysteine methyltransferase (EC 2.1.1.14)	100	100	100	100	100	99.77	99.74	CORE
	2353	D-alanyl-D-alanine carboxypeptidase (EC 3.4.16.4)	100	100	100	100	100	100	99.73	CORE
	780	Translation elongation factor Tu	100	100	100	100	100	99.73	99.73	CORE
	768	Translation elongation factor Tu	100	100	100	100	100	99.73	99.73	CORE
	1073	Cysteine desulfurase (EC 2.8.1.7) => NifS	100	100	100	100	100	99.71	99.73	CORE
	2056	NADH-ubiquinone oxidoreductase chain G (EC 1.6.5.3)	100	100	100	100	100	100	99.72	CORE
	1295	Inner membrane component of TAM transport system	100	100	100	100	100	99.67	99.72	CORE
	1058	Nitrogenase (molybdenum-iron) beta chain (EC 1.18.6.1)	100	100	100	100	100	100	99.71	CORE
	630	Multidrug efflux system EmrAB-OMF, inner-membrane proton/drug antiporter EmrB (MFS type)	100	100	100	100	100	99.56	99.71	CORE
	1516	ATP-dependent DNA helicase Rep	100	100	100	100	100	100	99.7	CORE
	871	Glutamyl-tRNA synthetase (EC 6.1.1.17)	100	100	100	100	100	99.79	99.7	CORE
	2697	DNA recombination protein RmuC	100	100	100	100	100	100	99.69	CORE
	2641	N-acetylglucosamine-1-phosphate uridyltransferase (EC 2.7.7.23) / Glucosamine-1-phosphate N-acetyltransferase (EC 2.3.1.157)	100	100	100	100	100	100	99.68	CORE
	2387	Ribonuclease G	100	100	100	100	100	100	99.68	CORE
	1871	carboxy-terminal processing protease	100	100	100	100	100	100	99.68	CORE
	265	Biosynthetic Aromatic amino acid aminotransferase beta (EC 2.6.1.57)	100	100	100	100	100	100	99.67	CORE
	2658	Magnesium and cobalt transport protein CorA	100	100	100	100	100	100	99.66	CORE
	2620	Mobile element protein	100	100	100	100	100	100	99.66	CORE
	2294	ABC-type efflux pump permease component YbhR	100	100	100	100	100	100	99.66	CORE
	1237	Mobile element protein	100	100	100	100	100	100	99.66	CORE
	838	Transcription termination protein NusA	100	100	100	100	100	100	99.65	CORE
	828	Thioredoxin reductase (EC 1.8.1.9)	100	100	100	100	100	100	99.65	CORE
	801	Protein translocase subunit SecY	100	100	100	100	100	100	99.65	CORE
	685	Glycosyl transferase, family 2	100	100	100	100	100	100	99.65	CORE
	295	RecA protein	100	100	100	100	100	100	99.65	CORE
	973	Phosphate ABC transporter, periplasmic phosphate-binding protein PstS (TC 3.A.1.7.1)	100	100	100	100	100	98.7	99.65	CORE
	2526	Homoserine kinase (EC 2.7.1.39)	100	100	100	100	100	96.94	99.65	CORE
	1708	3-polyprenyl-4-hydroxybenzoate carboxy-lyase (EC 4.1.1.98)	100	100	100	100	100	100	99.64	CORE
	663	D-alanine--D-alanine ligase (EC 6.3.2.4)	100	100	100	100	100	100	99.64	CORE
	1033	ABC-type Fe3+-siderophore transport system permease component	100	100	100	100	100	98.96	99.64	CORE
	3064	Lead, cadmium, zinc and mercury transporting ATPase (EC 3.6.3.3) (EC 3.6.3.5); Copper-translocating P-type ATPase (EC 3.6.3.4)	100	100	100	100	100	100	99.62	CORE
	2336	Protein containing domains DUF404, DUF407	100	100	100	100	100	100	99.62	CORE
	839	Translation initiation factor 2	100	100	100	100	100	100	99.62	CORE
	2979	3-dehydroquinate synthase (EC 4.2.3.4)	100	100	100	100	100	100	99.61	CORE
	1779	UTP--glucose-1-phosphate uridylyltransferase (EC 2.7.7.9)	100	100	100	100	100	100	99.61	CORE
	874	Succinyl-CoA ligase [ADP-forming] beta chain (EC 6.2.1.5)	100	100	100	100	100	100	99.61	CORE
	1062	NAD(+)--dinitrogen-reductase ADP-D-ribosyltransferase (EC 2.4.2.37)	100	100	100	100	100	99.61	99.61	CORE
	2924	Chaperone protein HscA	100	100	100	100	100	100	99.6	CORE
	2897	Endonuclease/exonuclease/phosphatase family protein	100	100	100	100	100	100	99.6	CORE
	2498	Glutamate--cysteine ligase (EC 6.3.2.2), divergent, of Alpha- and Beta-proteobacteria type	100	100	100	100	100	100	99.6	CORE
	2280	Site-specific tyrosine recombinase XerD	100	100	100	100	100	100	99.6	CORE
	290	Glutamyl-Q tRNA(Asp) synthetase	100	100	100	100	100	100	99.6	CORE
	2696	4-hydroxy-3-methylbut-2-enyl diphosphate reductase (EC 1.17.7.4)	100	100	100	100	100	100	99.59	CORE
	2440	Glycosyl transferase, group 1 family protein	100	100	100	100	100	100	99.59	CORE
	1484	Rubisco activation protein CbbQ	100	100	100	100	100	100	99.59	CORE
	2491	periplasmic/7TM domain sensor diguanylate cyclase	100	100	100	100	100	100	99.58	CORE
	2326	Bis-ABC ATPase Uup	100	100	100	100	100	99.82	99.58	CORE
	597	hypothetical protein	100	100	100	100	100	99.7	99.58	CORE
	1440	Aspartyl-tRNA(Asn) amidotransferase subunit A (EC 6.3.5.6) @ Glutamyl-tRNA(Gln) amidotransferase subunit A (EC 6.3.5.7)	100	100	100	100	100	98.36	99.58	CORE
	852	Argininosuccinate synthase (EC 6.3.4.5)	100	100	100	100	100	100	99.57	CORE
	302	Sulfhydrogenase subunit gamma (EC 1.12.98.4)	100	100	100	100	100	100	99.57	CORE
	1781	Putative sensory histidine kinase YfhA	100	100	100	100	100	99.71	99.57	CORE
	2562	hypothetical protein	100	100	100	100	100	99.46	99.57	CORE
	2271	ROK family protein	100	100	100	100	100	100	99.56	CORE
	2114	Glycogen synthase, ADP-glucose transglucosylase (EC 2.4.1.21)	100	100	100	100	100	100	99.56	CORE
	2849	Zinc ABC transporter, substrate-binding protein ZnuA	100	100	100	100	100	100	99.55	CORE
	322	Dihydrolipoamide dehydrogenase (EC 1.8.1.4)	100	100	100	100	100	100	99.55	CORE
	1266	DNA mismatch repair protein MutL	100	100	100	100	100	99.74	99.55	CORE
	2843	tRNA-i(6)A37 methylthiotransferase (EC 2.8.4.3)	100	100	100	100	100	98.96	99.55	CORE
	1419	Peptidase M48, Ste24p	100	100	100	100	100	100	99.54	CORE
	802	Adenylate kinase (EC 2.7.4.3)	100	100	100	100	100	100	99.54	CORE
	660	Cell division protein FtsZ	100	100	100	100	100	100	99.54	CORE
	2892	Thiazole synthase (EC 2.8.1.10)	100	100	100	100	100	99.61	99.54	CORE
	1686	FIG01964566: Predicted membrane protein, hemolysin III homolog	100	100	100	100	100	99.24	99.54	CORE
	2751	Efflux ABC transporter, permease/ATP-binding protein	100	100	100	100	100	99.5	99.53	CORE
	618	Phospholipid ABC transporter permease protein MlaE	100	100	100	100	100	100	99.52	CORE
	2894	UDP-N-acetylmuramate:L-alanyl-gamma-D-glutamyl-meso-diaminopimelate ligase (EC 6.3.2.-)	100	100	100	100	100	98.33	99.52	CORE
	1513	Inner-membrane proton/drug antiporter (MSF type) of tripartite multidrug efflux system	100	100	100	100	100	99.77	99.51	CORE
	1452	Adenosylhopane nucleosidase, HpnG	100	100	100	100	100	99.57	99.51	CORE
	311	Phosphomethylpyrimidine synthase ThiC (EC 4.1.99.17)	100	100	100	100	100	99.19	99.51	CORE
	1384	putative membrane protein	100	100	100	100	100	100	99.5	CORE
	1364	Topoisomerase IV subunit B (EC 5.99.1.-)	100	100	100	100	100	100	99.5	CORE
	1342	Isonitrile hydratase (EC 4.2.1.103)	100	100	100	100	100	99.5	99.5	CORE
	1162	Methylthioadenosine deaminase	100	100	100	100	100	100	99.49	CORE
	2107	Methionyl-tRNA synthetase (EC 6.1.1.10)	100	100	100	100	100	99.32	99.49	CORE
	2533	Phosphoribosyltransferase	100	100	100	100	100	100	99.48	CORE
	1942	AAA+ ATPase superfamily protein YifB/ComM, associated with DNA recombination	100	100	100	100	100	100	99.48	CORE
	701	8-amino-7-oxononanoate synthase (EC 2.3.1.47)	100	100	100	100	100	99.7	99.48	CORE
	213	Excinuclease ABC subunit B	100	100	100	100	100	99.62	99.48	CORE
	1711	HesA/MoeB/ThiF family protein	100	100	100	100	100	99.48	99.48	CORE
	225	Ferredoxin reductase	100	100	100	100	100	100	99.47	CORE
	1998	Rod shape-determining protein MreC	100	100	100	100	100	99.64	99.47	CORE
	1126	Tryptophanyl-tRNA synthetase (EC 6.1.1.2)	100	100	100	100	100	99.55	99.47	CORE
	2235	Short-chain dehydrogenase/reductase SDR?	100	100	100	100	100	99.47	99.47	CORE
	2066	Dihydropteroate synthase (EC 2.5.1.15)	100	100	100	100	100	97.37	99.47	CORE
	2869	hypothetical protein	100	100	100	100	100	100	99.46	CORE
	2643	ATP synthase beta chain (EC 3.6.3.14)	100	100	100	100	100	100	99.46	CORE
	767	OmpA family protein	100	100	100	100	100	100	99.46	CORE
	2776	hypothetical protein	100	100	100	100	100	97.78	99.46	CORE
	2595	Chaperone protein HtpG	100	100	100	100	100	100	99.45	CORE
	2508	N-acetyl-gamma-glutamyl-phosphate reductase (EC 1.2.1.38)	100	100	100	100	100	100	99.45	CORE
	1790	DNA polymerase III delta subunit (EC 2.7.7.7)	100	100	100	100	100	99.57	99.45	CORE
	2676	Hydrolase PA4440, alpha/beta fold family	100	100	100	100	100	100	99.44	CORE
	2459	Lipopolysaccharide export system protein LptA	100	100	100	100	100	100	99.44	CORE
	1020	TonB-dependent receptor	100	100	100	100	100	99.64	99.44	CORE
	1365	putative transmembrane sensor histidine kinase transcription regulator protein	100	100	100	100	100	99.12	99.44	CORE
	1546	Similar to phosphoglycolate phosphatase, clustered with ribosomal large subunit pseudouridine synthase C	100	100	100	100	100	100	99.43	CORE
	1658	Cytochrome b561	100	100	100	100	100	98.89	99.43	CORE
	1059	Nitrogenase (molybdenum-iron) alpha chain (EC 1.18.6.1)	100	100	100	100	100	99.19	99.42	CORE
	2030	Response regulator of zinc sigma-54-dependent two-component system	100	100	100	100	100	100	99.41	CORE
	1393	putative signal-transduction protein with CBS domains	100	100	100	100	100	99.24	99.41	CORE
	2278	FIG000875: Thioredoxin domain-containing protein EC-YbbN	100	100	100	100	100	92.06	99.41	CORE
	2476	Histidinol-phosphate aminotransferase (EC 2.6.1.9)	100	100	100	100	100	100	99.4	CORE
	2065	Phosphoglucosamine mutase (EC 5.4.2.10)	100	100	100	100	100	100	99.4	CORE
	1791	LPS-assembly lipoprotein LptE	100	100	100	100	100	100	99.4	CORE
	1506	molybdopterin oxidoreductase, molybdopterin binding subunit	100	100	100	100	100	99.18	99.4	CORE
	2943	S-formylglutathione hydrolase (EC 3.1.2.12)	100	100	100	100	100	100	99.39	CORE
	2117	Endonuclease III (EC 4.2.99.18)	100	100	100	100	100	100	99.39	CORE
	698	protein of unknown function DUF323	100	100	100	100	100	100	99.39	CORE
	2695	16S rRNA (uracil(1498)-N(3))-methyltransferase (EC 2.1.1.193)	100	100	100	100	100	100	99.38	CORE
	2335	hypothetical protein	100	100	100	100	100	100	99.38	CORE
	1789	Uncharacterized MFS-type transporter	100	100	100	100	100	100	99.38	CORE
	1254	Thymidylate kinase (EC 2.7.4.9)	100	100	100	100	100	100	99.38	CORE
	2661	Magnesium and cobalt transport protein CorA	100	100	100	100	100	100	99.37	CORE
	1397	Dihydrofolate synthase (EC 6.3.2.12) @ Folylpolyglutamate synthase (EC 6.3.2.17)	100	100	100	100	100	100	99.37	CORE
	555	Ribulose bisphosphate carboxylase large chain (EC 4.1.1.39)	100	100	100	100	100	84.78	99.37	CORE
	1263	Adenosylmethionine-8-amino-7-oxononanoate aminotransferase (EC 2.6.1.62)	100	100	100	100	100	100	99.36	CORE
	1360	Glucose-6-phosphate 1-dehydrogenase (EC 1.1.1.49)	100	100	100	100	100	99.71	99.36	CORE
	2523	DNA polymerase I (EC 2.7.7.7)	100	100	100	100	100	100	99.35	CORE
	2745	short chain dehydrogenase( EC:1.- )	100	100	100	100	100	99.59	99.35	CORE
	1508	NrfD protein	100	100	100	100	100	100	99.34	CORE
	1215	Membrane alanine aminopeptidase N (EC 3.4.11.2)	100	100	100	100	100	100	99.34	CORE
	944	ADP-heptose synthase (EC 2.7.-.-) / D-glycero-beta-D-manno-heptose 7-phosphate kinase	100	100	100	100	100	99.35	99.34	CORE
	2493	Aspartate carbamoyltransferase (EC 2.1.3.2)	100	100	100	100	100	99.32	99.34	CORE
	296	Regulatory protein RecX	100	100	100	100	100	99.26	99.33	CORE
	2228	Type I restriction-modification system, DNA-methyltransferase subunit M (EC 2.1.1.72)	100	100	100	100	100	100	99.32	CORE
	2222	hypothetical protein	100	100	100	100	100	100	99.32	CORE
	1870	DJ-1 family protein	100	100	100	100	100	100	99.32	CORE
	788	SSU ribosomal protein S3p (S3e)	100	100	100	100	100	100	99.32	CORE
	2390	Sensor histidine kinase GlrK	100	100	100	100	100	97.32	99.32	CORE
	1599	TonB family protein	100	100	100	100	100	100	99.3	CORE
	349	hypothetical protein	100	100	100	100	100	100	99.3	CORE
	3054	Periplasmic aromatic aldehyde oxidoreductase, FAD binding subunit YagS	100	100	100	100	100	100	99.29	CORE
	2997	hypothetical protein	100	100	100	100	100	100	99.29	CORE
	2659	Magnesium and cobalt transport protein CorA	100	100	100	100	100	100	99.29	CORE
	1450	Ceramide glucosyltransferase (EC 2.4.1.80)	100	100	100	100	100	100	99.29	CORE
	1439	Aspartyl-tRNA(Asn) amidotransferase subunit B (EC 6.3.5.6) @ Glutamyl-tRNA(Gln) amidotransferase subunit B (EC 6.3.5.7)	100	100	100	100	100	100	99.29	CORE
	1374	TonB-dependent receptor	100	100	100	100	100	100	99.29	CORE
	622	Efflux ABC transporter, ATP-binding protein	100	100	100	100	100	100	99.29	CORE
	2919	Iron-sulfur cluster regulator IscR	100	100	100	100	100	100	99.28	CORE
	1886	Fibronectin/fibrinogen-binding protein	100	100	100	100	100	100	99.28	CORE
	730	MBL-fold metallo-hydrolase superfamily	100	100	100	100	100	100	99.28	CORE
	824	2-C-methyl-D-erythritol 2,4-cyclodiphosphate synthase (EC 4.6.1.12)	100	100	100	100	100	100	99.26	CORE
	1449	Fe-S oxidoreductase	100	100	100	100	100	99.77	99.26	CORE
	1252	Aminodeoxychorismate lyase (EC 4.1.3.38)	100	100	100	100	100	99.65	99.26	CORE
	2447	Capsular polysaccharide biosynthesis protein WcbQ	100	100	100	100	100	100	99.25	CORE
	1354	hypothetical protein	100	100	100	100	100	100	99.25	CORE
	699	tRNA (cytidine(34)-2'-O)-methyltransferase (EC 2.1.1.207)	100	100	100	100	100	100	99.25	CORE
	2208	Uncharacterized UPF0721 integral membrane protein	100	100	100	100	100	99.51	99.24	CORE
	1243	Inner membrane protein YihY, formerly thought to be RNase BN	100	100	100	100	100	99.39	99.24	CORE
	2477	Imidazoleglycerol-phosphate dehydratase (EC 4.2.1.19)	100	100	100	100	100	98.39	99.24	CORE
	1264	CBS domain protein sometimes clustered with YjeE	100	100	100	100	100	100	99.22	CORE
	1302	Fatty acid desaturase	100	100	100	100	100	93.61	99.22	CORE
	2277	hypothetical protein	100	100	100	100	100	100	99.21	CORE
	1464	ABC transporter, substrate-binding protein (cluster 9, phospholipid)	100	100	100	100	100	100	99.21	CORE
	2100	Chaperone protein DnaJ	100	100	100	100	100	99.35	99.21	CORE
	2425	ABC transporter, permease protein	100	100	100	100	100	98.85	99.2	CORE
	1672	Uncharacterized protein, similar to the N-terminal domain of Lon protease	100	100	100	100	100	100	99.19	CORE
	1893	Cytochrome c-type biogenesis protein DsbD, protein-disulfide reductase (EC 1.8.1.8)	100	100	100	100	100	99.52	99.19	CORE
	638	Ferrochelatase, protoheme ferro-lyase (EC 4.99.1.1)	100	100	100	100	100	100	99.17	CORE
	2554	Sulfite reductase [NADPH] flavoprotein alpha-component (EC 1.8.1.2)	100	100	100	100	100	99.29	99.17	CORE
	2111	hypothetical protein	100	100	100	100	100	100	99.16	CORE
	2138	Type II/IV secretion system secretin RcpA/CpaC, associated with Flp pilus assembly	100	100	100	100	100	100	99.15	CORE
	855	Aspartokinase (EC 2.7.2.4)	100	100	100	100	100	99.75	99.15	CORE
	1719	Integrase, catalytic region	100	100	100	100	100	100	99.14	CORE
	1232	Adenylosuccinate synthetase (EC 6.3.4.4)	100	100	100	100	100	100	99.13	CORE
	1811	VapC toxin protein	100	100	100	100	100	100	99.12	CORE
	927	Efflux ABC transporter for glutathione/L-cysteine, essential for assembly of bd-type respiratory oxidases => CydD subunit	100	100	100	100	100	100	99.1	CORE
	869	Membrane-bound lytic murein transglycosylase D	100	100	100	100	100	100	99.1	CORE
	2139	Flp pilus assembly protein RcpC/CpaB	100	100	100	100	100	100	99.09	CORE
	876	Succinyl-CoA ligase [ADP-forming] alpha chain (EC 6.2.1.5)	100	100	100	100	100	100	99.09	CORE
	351	hypothetical protein	100	100	100	100	100	100	99.09	CORE
	1808	hypothetical protein	100	100	100	100	100	100	99.08	CORE
	1293	Iron-responsive regulator Irr	100	100	100	100	100	100	99.08	CORE
	1993	Cyclic pyranopterin phosphate synthase (MoaA) (EC 4.1.99.18)	100	100	100	100	100	100	99.07	CORE
	1968	Deacetylases, including yeast histone deacetylase and acetoin utilization protein	100	100	100	100	100	100	99.07	CORE
	700	Competence protein F homolog, phosphoribosyltransferase domain; protein YhgH required for utilization of DNA as sole source of carbon and energy	100	100	100	100	100	100	99.07	CORE
	2291	ABC-type efflux pump membrane fusion component YbhG	100	100	100	100	100	97.62	99.07	CORE
	1872	Murein hydrolase activator EnvC	100	100	100	100	100	98.63	99.06	CORE
	1654	hypothetical protein	100	100	100	100	100	100	99.04	CORE
	2195	TPR domain protein	100	100	100	100	100	100	99.03	CORE
	2354	Glucose-6-phosphate isomerase (EC 5.3.1.9)	100	100	100	100	100	100	99.02	CORE
	2186	Signal recognition particle receptor FtsY	100	100	100	100	100	100	99.02	CORE
	1665	Recombination inhibitory protein MutS2	100	100	100	100	100	99.66	99.01	CORE
	2535	Transposase and inactivated derivatives	100	100	100	100	100	88.89	99.01	CORE
	2957	[NiFe] hydrogenase metallocenter assembly protein HypF	100	100	100	100	100	100	99	CORE
	2173	probable phosphatidylethanolamine N-methyltransferase	100	100	100	100	100	100	99	CORE
	2169	hypothetical protein	100	100	100	100	100	100	99	CORE
	549	Carboxysome shell protein CsoS1	100	100	100	100	100	98.91	98.98	CORE
	710	CDP-6-deoxy-delta-3,4-glucoseen reductase	100	100	100	100	100	98.82	98.98	CORE
	2579	Cytochrome c oxidase assembly factor	100	100	100	100	100	98.71	98.98	CORE
	2163	Short-chain dehydrogenase/reductase SDR?	100	100	100	100	100	95.8	98.98	CORE
	2686	Ribulose-phosphate 3-epimerase (EC 5.1.3.1)	100	100	100	100	100	100	98.97	CORE
	2468	LPS-assembly protein LptD @ Organic solvent tolerance protein precursor	100	100	100	100	100	100	98.96	CORE
	1978	geranylgeranyl reductase	100	100	100	100	100	100	98.96	CORE
	1086	Small-conductance mechanosensitive channel	100	100	100	100	100	100	98.96	CORE
	1472	Peptidoglycan D,D-transpeptidase MrdA (EC 3.4.16.4)	100	100	100	100	100	100	98.95	CORE
	2359	Cyclopropane-fatty-acyl-phospholipid synthase (EC 2.1.1.79)	100	100	100	100	100	99.55	98.95	CORE
	2949	hypothetical protein	100	100	100	100	100	100	98.9	CORE
	648	Cell division protein ZapD	100	100	100	100	100	100	98.9	CORE
	2764	Guanosine-3',5'-bis(diphosphate) 3'-pyrophosphohydrolase (EC 3.1.7.2) / GTP pyrophosphokinase (EC 2.7.6.5), (p)ppGpp synthetase II	100	100	100	100	100	99.66	98.89	CORE
	2529	hypothetical protein	100	100	100	100	100	99.11	98.86	CORE
	1668	RNA polymerase sigma factor RpoS	100	100	100	100	100	99.57	98.84	CORE
	1325	UDP-2,3-diacylglucosamine diphosphatase (EC 3.6.1.54)	100	100	100	100	100	100	98.8	CORE
	1109	Glycosyl transferase, group 2 family	100	100	100	100	100	100	98.78	CORE
	2048	Threonyl-tRNA synthetase (EC 6.1.1.3)	100	100	100	100	100	100	98.77	CORE
	993	Acyl-[acyl-carrier-protein]--UDP-N-acetylglucosamine O-acyltransferase (EC 2.3.1.129)	100	100	100	100	100	100	98.76	CORE
	2238	hypothetical protein	100	100	100	100	100	100	98.75	CORE
	1514	Transcriptional regulator, MarR family	100	100	100	100	100	100	98.75	CORE
	595	Coproporphyrinogen III oxidase, oxygen-independent (EC 1.3.99.22)	100	100	100	100	100	100	98.74	CORE
	2155	Ribonucleotide reductase of class III (anaerobic), activating protein (EC 1.97.1.4)	100	100	100	100	100	100	98.72	CORE
	651	Lytic transglycosylase, catalytic	100	100	100	100	100	100	98.72	CORE
	2297	hypothetical protein	100	100	100	100	100	91.43	98.72	CORE
	718	hypothetical protein	100	100	100	100	100	100	98.71	CORE
	2495	Putative pre-16S rRNA nuclease Yqg	100	100	100	100	100	100	98.68	CORE
	1249	3-oxoacyl-[acyl-carrier protein] reductase (EC 1.1.1.100)	100	100	100	100	100	100	98.68	CORE
	1214	hypothetical protein	100	100	100	100	100	100	98.68	CORE
	1168	Phospholipid ABC transporter shuttle protein MlaC	100	100	100	100	100	99.51	98.68	CORE
	1507	Quad-[4Fe-4S] ferredoxin, HycB/HydN/HyfA family	100	100	100	100	100	82.14	98.68	CORE
	2000	Peptidoglycan D,D-transpeptidase MrdA (EC 3.4.16.4)	100	100	100	100	100	100	98.67	CORE
	2870	Transcriptional regulator, Xre family	100	100	100	100	100	100	98.65	CORE
	2202	PilT protein domain protein	100	100	100	100	100	100	98.65	CORE
	1196	Glucan 1,4-alpha-glucosidase (EC 3.2.1.3)	100	100	100	100	100	100	98.65	CORE
	511	molecular chaperone	100	100	100	100	100	100	98.65	CORE
	1125	Membrane protein	100	100	100	100	100	100	98.63	CORE
	308	Phosphomannomutase (EC 5.4.2.8)	100	100	100	100	100	100	98.61	CORE
	1975	hypothetical protein	100	100	100	100	100	100	98.59	CORE
	1695	Transcriptional regulator, ArsR family	100	100	100	100	100	100	98.55	CORE
	1009	Fumarylacetoacetate hydrolase family protein	100	100	100	100	100	99.33	98.55	CORE
	2148	hypothetical protein	100	100	100	100	100	98.55	98.55	CORE
	2494	Pyrimidine operon regulatory protein PyrR	100	100	100	100	100	100	98.53	CORE
	546	bacterioferritin possible associated with carboxysome	100	100	100	100	100	100	98.53	CORE
	2182	hypothetical protein	100	100	100	100	100	100	98.51	CORE
	2118	FOG: TPR repeat	100	100	100	100	100	100	98.51	CORE
	2463	hypothetical protein	100	100	100	100	100	100	98.48	CORE
	1803	RNA polymerase sigma factor RpoS	100	100	100	100	100	100	98.48	CORE
	137	protein of unknown function DUF45	100	100	100	100	100	100	98.48	CORE
	3067	hypothetical protein	100	100	100	100	100	100	98.44	CORE
	1517	SSU ribosomal protein S20p	100	100	100	100	100	100	98.44	CORE
	1522	Bis(5'-nucleosyl)-tetraphosphatase, symmetrical (EC 3.6.1.41)	100	100	100	100	100	99.47	98.44	CORE
	1956	Outer membrane low permeability porin, OprB family	100	100	100	100	100	99.19	98.39	CORE
	2608	Glyoxalase/bleomycin resistance protein/dioxygenase	100	100	100	100	100	98.39	98.39	CORE
	2234	Glyoxalase/bleomycin resistance protein/dioxygenase	100	100	100	100	100	98.39	98.39	CORE
	1488	Spermidine synthase-like protein	100	100	100	100	100	100	98.33	CORE
	695	3-deoxy-D-manno-octulosonic acid transferase (EC 2.4.99.12)(EC 2.4.99.13)	100	100	100	100	100	100	98.33	CORE
	3056	Periplasmic aromatic aldehyde oxidoreductase, iron-sulfur subunit YagT	100	100	100	100	100	100	98.31	CORE
	2058	NADH-ubiquinone oxidoreductase chain E (EC 1.6.5.3)	100	100	100	100	100	100	98.31	CORE
	1645	Phosphohistidine phosphatase SixA	100	100	100	100	100	100	98.31	CORE
	1298	D-alanyl-D-alanine carboxypeptidase (EC 3.4.16.4)	100	100	100	100	100	100	98.31	CORE
	834	Seryl-tRNA synthetase (EC 6.1.1.11)	100	100	100	100	100	100	98.31	CORE
	2572	Sensor histidine kinase PrrB (RegB) (EC 2.7.3.-)	100	100	100	100	100	100	98.28	CORE
	2545	hypothetical protein	100	100	100	100	100	100	98.25	CORE
	1804	protein of unknown function DUF498	100	100	100	100	100	100	98.25	CORE
	792	LSU ribosomal protein L14p (L23e)	100	100	100	100	100	98.25	98.15	CORE
	1445	hypothetical protein	100	100	100	100	100	100	98.08	CORE
	1717	hypothetical protein	100	100	100	100	100	99.13	98.05	CORE
	2064	Triosephosphate isomerase (EC 5.3.1.1)	100	100	100	100	100	100	98.04	CORE
	2912	Cell division protein BolA	100	100	100	100	100	100	97.96	CORE
	2012	hypothetical protein	100	100	100	100	100	100	97.96	CORE
	2854	hypothetical protein	100	100	100	100	100	99.63	97.96	CORE
	2743	Hydroxymethylpyrimidine phosphate kinase ThiD (EC 2.7.4.7)	100	100	100	100	100	100	97.92	CORE
	2003	Proposed lipoate regulatory protein YbeD	100	100	100	100	100	100	97.92	CORE
	2137	Type II/IV secretion system ATPase TadZ/CpaE, associated with Flp pilus assembly	100	100	100	100	100	99.63	97.89	CORE
	2958	[NiFe] hydrogenase metallocenter assembly protein HypC	100	100	100	100	100	100	97.87	CORE
	1954	hypothetical protein	100	100	100	100	100	100	97.87	CORE
	2286	Signal recognition particle protein Ffh	100	100	100	100	100	99.25	97.87	CORE
	1653	NAD-dependent epimerase/dehydratase	100	100	100	100	100	99.61	97.83	CORE
	2910	hypothetical protein	100	100	100	100	100	98.11	97.83	CORE
	826	zinc-responsive transcriptional regulator	100	100	100	100	100	100	97.75	CORE
	1110	hypothetical protein	100	100	100	100	100	97.73	97.73	CORE
	632	Ribosomal protein L3 N(5)-glutamine methyltransferase (EC 2.1.1.298)	100	100	100	100	100	99.22	97.67	CORE
	1564	Potassium-transporting ATPase C chain (EC 3.6.3.12) (TC 3.A.3.7.1)	100	100	100	100	100	98.86	97.65	CORE
	2735	TonB family protein	100	100	100	100	100	100	97.62	CORE
	862	Prevent-host-death family protein	100	100	100	100	100	100	97.56	CORE
	2692	Fructose-1,6-bisphosphatase, GlpX type (EC 3.1.3.11)	100	100	100	100	100	99.3	97.56	CORE
	1160	Similar to phosphoglycolate phosphatase, clustered with ubiquinone biosynthesis SAM-dependent O-methyltransferase	100	100	100	100	100	100	97.5	CORE
	620	Phospholipid ABC transporter shuttle protein MlaC	100	100	100	100	100	100	97.5	CORE
	2878	Intracellular protease	100	100	100	100	100	99.4	97.5	CORE
	858	hypothetical protein	100	100	100	100	100	97.5	97.5	CORE
	2651	Chromosome (plasmid) partitioning protein ParB	100	100	100	100	100	100	97.44	CORE
	1019	globin family protein	100	100	100	100	100	100	97.44	CORE
	551	Carboxysome peptide A	100	100	100	100	100	100	97.4	CORE
	1679	Uncharacterized UPF0721 integral membrane protein	100	100	100	100	100	100	97.3	CORE
	3014	MotA/TolQ/ExbB proton channel	100	100	100	100	100	100	97.2	CORE
	1345	hypothetical protein	100	100	100	100	100	96.43	96.92	CORE
	309	hypothetical protein	100	100	100	100	100	98.94	96.81	CORE
	2542	Cytochrome c-type biogenesis protein CcsA/ResC	100	100	100	100	100	100	96.4	CORE
	1008	hypothetical protein	100	100	100	100	100	95.73	96.05	CORE
	2094	hypothetical protein	100	100	100	100	100	100	95.83	CORE
	427	hypothetical protein	100	100	100	100	100	100	95.73	CORE
	1423	hypothetical protein	100	100	100	100	100	97.73	94.68	CORE
	2438	Acetyltransferase	100	100	100	100	100	100	94.59	CORE
	2590	Mobile element protein	100	100	100	100	100	100	94.56	CORE
	2217	hypothetical protein	100	100	100	100	100	100	94.52	CORE
	537	Threonylcarbamoyl-AMP synthase (EC 2.7.7.87) / SUA5 domain with internal deletion	100	100	100	100	100	100	94.21	CORE
	227	Putative bacterial haemoglobin	100	100	100	100	100	100	94.12	CORE
	2070	Ribonucleotide reductase of class Ia (aerobic), beta subunit (EC 1.17.4.1)	100	100	100	100	100	100	93.77	CORE
	1286	Cobalt-zinc-cadmium resistance protein CzcA; Cation efflux system protein CusA	100	100	100	100	100	97.44	92.67	CORE
	545	hypothetical protein	100	100	100	100	100	100	92.39	CORE
	2936	Putative transposase	100	100	100	100	100	99.01	92	CORE
	1122	hypothetical protein	100	100	100	100	100	100	91.3	CORE
	3060	Chloride channel protein	100	100	100	100	100	100	90.76	CORE
	550	Carboxysome peptide B	100	100	100	100	100	97.5	90.57	CORE
	2860	hypothetical protein	100	100	100	100	100	90.44	90.57	CORE
	585	hypothetical protein	100	100	100	100	100	100	90.27	CORE
	519	Transposase and inactivated derivatives	100	100	100	100	100	93.67	90.12	CORE
	3062	Transcriptional regulator, LysR family	100	100	100	100	100	100	90	CORE
	1095	hypothetical protein	100	100	100	100	100	100	87.93	CORE
	2408	hypothetical protein	100	100	100	100	100	97.26	87.8	CORE
	2028	Transcriptional regulator, HxlR family	100	100	100	100	100	100	87.1	CORE
	2667	hypothetical protein	100	100	100	100	100	82.53	87.1	CORE
	1171	RNA polymerase sigma factor RpoS	100	100	100	100	100	99.3	86.16	CORE
	2594	Transposase and inactivated derivatives	100	100	100	100	100	100	85.71	CORE
	542	Rubisco activation protein CbbQ	100	100	100	100	100	100	84.64	CORE
	1291	Uncharacterized protein MJ0754	100	100	100	100	100	100	84.38	CORE
	3059	Inner membrane transport protein YajR	100	100	100	100	100	100	84.13	CORE
	1940	Integrase, catalytic region	100	100	100	100	100	99.81	83.58	CORE
	244	transposition helper protein	100	100	100	100	100	100	82	CORE
	2216	hypothetical protein	100	100	100	100	100	100	81.67	CORE
	2205	hypothetical protein	100	100	100	100	100	100	81.58	CORE
	2090	PIN (PilT N terminus) domain	100	100	100	100	100	100	81.52	CORE
	2629	hypothetical protein	100	100	100	100	100	100	80	CORE
	1434	RND efflux system, inner membrane transporter	100	100	100	100	99.9	100	100	CORE
	2755	Isoleucyl-tRNA synthetase (EC 6.1.1.5)	100	100	100	100	99.89	99.86	99.74	CORE
	2267	1,4-alpha-glucan (glycogen) branching enzyme, GH-13-type (EC 2.4.1.18)	100	100	100	100	99.86	100	100	CORE
	1496	Bacteriocin/lantibiotic efflux ABC transporter, permease/ATP-binding protein	100	100	100	100	99.85	99.54	100	CORE
	1030	TonB-dependent receptor	100	100	100	100	99.8	100	99.75	CORE
	75	Glycosyltransferase	100	100	100	100	99.79	99.58	100	CORE
	31	phosphate-selective porin O and P	100	100	100	100	99.78	99.56	100	CORE
	2388	Transcriptional response regulatory protein GlrR	100	100	100	100	99.78	97.89	100	CORE
	1501	Beta-lactamase class C-like and penicillin binding proteins (PBPs) superfamily	100	100	100	100	99.77	100	100	CORE
	972	Phosphate regulon sensor protein PhoR (SphS) (EC 2.7.13.3)	100	100	100	100	99.77	98.87	100	CORE
	1392	Magnesium and cobalt efflux protein CorC	100	100	100	100	99.77	99.69	99.77	CORE
	2734	Uncharacterized MFS-type transporter	100	100	100	100	99.77	100	96.3	CORE
	2194	Glutamyl-tRNA reductase (EC 1.2.1.70)	100	100	100	100	99.74	99.26	98.61	CORE
	262	Phosphoserine aminotransferase (EC 2.6.1.52)	100	100	100	100	99.71	98.88	100	CORE
	1370	RND efflux system, membrane fusion protein	100	100	100	100	99.7	100	100	CORE
	1547	Ribosomal large subunit pseudouridine synthase C (EC 5.4.99.24)	100	100	100	100	99.68	99.3	98.89	CORE
	2380	Thiol:disulfide interchange protein DsbG precursor	100	100	100	100	99.67	100	100	CORE
	703	Malonyl-[acyl-carrier protein] O-methyltransferase (EC 2.1.1.197)	100	100	100	100	99.66	100	100	CORE
	691	Glycosyl transferase, family 2	100	100	100	100	99.65	100	100	CORE
	2556	Adenylyl-sulfate reductase [thioredoxin] (EC 1.8.4.10)	100	100	100	100	99.58	99.57	98.82	CORE
	2206	Glutathione S-transferase (EC 2.5.1.18)	100	100	100	100	99.57	90.91	99.49	CORE
	1670	Ribonuclease PH (EC 2.7.7.56)	100	100	100	100	99.53	99.57	100	CORE
	1986	Uncharacterized protein HTH_1880	100	100	100	100	99.51	97.91	100	CORE
	2113	3-deoxy-D-manno-octulosonic-acid transferase-like protein	100	100	100	100	99.42	100	97.83	CORE
	1476	Transcriptional regulator, MerR family	100	100	100	100	99.39	99.39	97.3	CORE
	292	Phosphatidylglycerophosphatase A (EC 3.1.3.27)	100	100	100	100	99.34	100	100	CORE
	2141	peptidase A24A, prepilin type IV	100	100	100	100	99.31	100	99.12	CORE
	1688	Thioredoxin 2	100	100	100	100	99.29	99.29	100	CORE
	1303	hypothetical protein	100	100	100	100	99.19	98.88	100	CORE
	840	Ribosome-binding factor A	100	100	100	100	99.12	98.51	99.12	CORE
	1050	4Fe-4S ferredoxin, nitrogenase-associated	100	100	100	100	99.02	98.39	100	CORE
	2125	hypothetical protein	100	100	100	100	98.99	92.13	100	CORE
	623	Ribosome-associated heat shock protein implicated in the recycling of the 50S subunit (S4 paralog)	100	100	100	100	98.8	100	100	CORE
	621	Phospholipid ABC transporter-binding protein MlaB	100	100	100	100	98.7	100	98.7	CORE
	800	LSU ribosomal protein L15p (L27Ae)	100	100	100	100	98.59	98.59	98.59	CORE
	1843	hypothetical protein	100	100	100	100	98.15	100	98.15	CORE
	2901	AttF component of AttEFGH ABC transport system / AttG component of AttEFGH ABC transport system	100	100	100	99.88	100	99.8	99.83	CORE
	1910	Potassium-transporting ATPase A chain (EC 3.6.3.12) (TC 3.A.3.7.1)	100	100	100	99.83	100	99.25	100	CORE
	645	Type IV fimbriae expression regulatory protein PilR	100	100	100	99.78	100	99.22	99.74	CORE
	2775	Para-aminobenzoate synthase, aminase component (EC 2.6.1.85)	100	100	100	99.77	100	99.5	99.61	CORE
	259	23S rRNA (cytosine(1962)-C(5))-methyltransferase (EC 2.1.1.191)	100	100	100	99.75	100	98.56	99.35	CORE
	540	Fructose-bisphosphate aldolase class II (EC 4.1.2.13)	100	100	100	99.75	100	99.75	96.44	CORE
	523	hypothetical protein	100	100	100	99.71	100	99.69	90.64	CORE
	1518	Molybdenum ABC transporter ATP-binding protein ModC	100	100	100	99.7	100	100	100	CORE
	2900	AttH component of AttEFGH ABC transport system	100	100	100	99.7	100	100	99.38	CORE
	1080	Molybdenum transport system protein ModD	100	100	100	99.65	100	98.89	98.91	CORE
	1970	ATPase associated with various cellular activities AAA_5	100	100	100	99.63	100	100	100	CORE
	1519	ABC transporter, permease protein	100	100	100	99.63	100	100	100	CORE
	539	Dethiobiotin synthetase (EC 6.3.3.3)	100	100	100	99.62	100	99.62	91.98	CORE
	553	Carboxysome shell protein CsoS2	100	100	100	99.61	100	99.17	91.88	CORE
	544	ParA-like protein	100	100	100	99.53	100	98.91	95.73	CORE
	535	Dihydroorotase (EC 3.5.2.3)	100	100	100	99.42	100	99.14	93.15	CORE
	524	Hypothetical transmembrane protein coupled to NADH-ubiquinone oxidoreductase chain 5 homolog	100	100	100	99.39	100	99.31	88.19	CORE
	530	Phosphoketolase	100	100	100	99.32	100	99.32	96.49	CORE
	547	Carboxysome shell protein CsoS1	100	100	100	99.11	100	99.11	99.11	CORE
	536	Dihydroxy-acid dehydratase (EC 4.2.1.9)	100	100	100	99.1	100	99.3	95.24	CORE
	554	Ribulose bisphosphate carboxylase small chain (EC 4.1.1.39)	100	100	100	99.09	100	99.09	97.27	CORE
	526	Glycolate dehydrogenase (EC 1.1.99.14), iron-sulfur subunit GlcF	100	100	100	98.8	100	98.8	94.47	CORE
	1471	hypothetical protein	100	100	100	98.7	100	98.7	100	CORE
	533	hypothetical protein	100	100	100	98.63	100	98.63	91.78	CORE
	1199	Pterin-4-alpha-carbinolamine dehydratase (EC 4.2.1.96)	100	100	100	98.63	98.63	100	100	CORE
	525	NADH dehydrogenase, subunit 5	100	100	100	98.53	100	98.53	90.84	CORE
	3004	ATP synthase epsilon chain (EC 3.6.3.14)	100	100	100	97.66	100	96.04	100	CORE
	448	hypothetical protein	100	100	100	97.32	97.13	97.13	81.4	CORE
	476	hypothetical protein	100	100	100	97.26	100	97.26	97.26	CORE
	450	hypothetical protein	100	100	100	96.75	97.4	96.75	96.1	CORE
	881	hypothetical protein	100	100	100	96.13	100	95.77	90.32	CORE
	905	DNA topoisomerase III (EC 5.99.1.2)	100	100	100	95.46	94.44	94.85	94.3	CORE
	890	DNA topoisomerase III (EC 5.99.1.2)	100	100	100	95.18	100	93.01	94.72	CORE
	414	SAM-dependent methyltransferase	100	100	100	93.92	94.59	93.92	94.59	CORE
	412	DNA replication helicase loader DnaC/DnaI	100	100	100	93.01	92.61	95.52	97.19	CORE
	413	hypothetical protein	100	100	100	90.86	93.07	88.46	93.35	CORE
	1701	DEAD/DEAH box helicase domain protein	100	100	99.91	100	100	99.47	100	CORE
	1376	heavy metal efflux pump, CzcA family	100	100	99.9	100	99.9	100	99.32	CORE
	1657	Mg(2+) transport ATPase, P-type (EC 3.6.3.2)	100	100	99.88	100	99.88	100	100	CORE
	843	Polyribonucleotide nucleotidyltransferase (EC 2.7.7.8)	100	100	99.86	100	100	100	100	CORE
	1432	transposase / Type I secretion outer membrane protein, TolC family	100	100	99.86	100	100	99.48	100	CORE
	2633	hypothetical protein	100	100	99.85	100	100	100	100	CORE
	1908	Potassium-transporting ATPase A chain (EC 3.6.3.12) (TC 3.A.3.7.1)	100	100	99.83	100	100	100	100	CORE
	1563	Potassium-transporting ATPase B chain (EC 3.6.3.12) (TC 3.A.3.7.1)	100	100	99.81	99.81	99.81	95.04	100	CORE
	1747	Chromosome partition protein smc	100	100	99.8	100	99.8	99.4	100	CORE
	1643	Uncharacterized MFS-type transporter	100	100	99.78	100	100	100	100	CORE
	1140	NADH oxidase, putative	100	100	99.78	100	99.78	100	93.33	CORE
	2259	23S rRNA (uracil(1939)-C(5))-methyltransferase (EC 2.1.1.190)	100	100	99.77	100	100	99.77	100	CORE
	1329	hypothetical protein	100	100	99.77	100	100	98.7	100	CORE
	1573	Na+/H+ antiporter	100	100	99.75	100	99.75	100	97.67	CORE
	1193	Uncharacterized MFS-type transporter	100	100	99.74	100	100	98.44	100	CORE
	754	Homoserine O-acetyltransferase (EC 2.3.1.31)	100	100	99.73	100	100	100	100	CORE
	581	Sensory box protein	100	100	99.7	99.7	99.7	100	83.98	CORE
	1279	Phosphate transport system permease protein PstC (TC 3.A.1.7.1)	100	100	99.66	100	100	99.47	100	CORE
	2639	TnsA endonuclease	100	100	99.64	100	100	97.37	100	CORE
	2702	outer membrane efflux protein	100	100	99.63	100	99.74	100	99.44	CORE
	1553	probable glucose 1-dehydrogenase	100	100	99.62	100	100	98.7	96.17	CORE
	820	Peroxiredoxin family protein/glutaredoxin	100	100	99.6	100	100	100	100	CORE
	289	Sugar fermentation stimulation protein SfsA	100	100	99.57	99.57	99.57	99.55	99.57	CORE
	1415	dienelactone hydrolase	100	100	99.48	100	99.48	98.48	100	CORE
	1941	hypothetical protein	100	100	99.47	99.47	99.32	100	89.84	CORE
	1347	Transcriptional regulator, AcrR family	100	100	99.46	100	100	100	100	CORE
	117	hypothetical protein	100	100	99.46	100	100	100	100	CORE
	3034	hypothetical protein	100	100	99.43	100	100	100	86.14	CORE
	2985	Type IV pilus biogenesis protein PilM	100	100	99.42	100	100	81.76	100	CORE
	1987	Heterodisulfide reductase subunit A like protein HTH_1881	100	100	99.4	99.72	99.4	98.96	99.4	CORE
	509	protease Do	100	100	99.4	99.39	99.8	99.44	94.66	CORE
	1341	Acetyltransferase, GNAT family	100	100	99.34	100	100	100	94.44	CORE
	619	Phospholipid ABC transporter substrate-binding protein MlaD	100	100	99.34	99.34	99.34	98.6	99.34	CORE
	2047	Translation initiation factor 3	100	100	99.3	100	100	99.3	99.3	CORE
	1389	Protein translocase subunit YajC	100	100	99.1	99.1	99.1	99.1	99.1	CORE
	2245	hypothetical protein	100	100	99.09	100	100	99.09	100	CORE
	3074	hypothetical protein	100	100	99.06	99.06	99.06	99.06	91.75	CORE
	1852	hypothetical protein	100	100	99.06	99.06	99.06	99.06	91.75	CORE
	3078	Integrase/recombinase, RitA	100	100	99.03	100	100	100	100	CORE
	1854	Integrase/recombinase, RitA	100	100	99.03	100	100	100	100	CORE
	1723	Integrase/recombinase, RitA	100	100	99.03	100	100	100	100	CORE
	2307	Transcriptional regulator, LysR family	100	100	98.92	100	100	98.92	100	CORE
	1612	Alpha-D-ribose 1-methylphosphonate 5-triphosphate synthase subunit PhnI (EC 2.7.8.37)	100	100	98.9	100	100	100	100	CORE
	1202	Copper(I) chaperone CopZ	100	100	98.65	100	100	100	82.54	CORE
	1380	Sodium-transporting ATPase subunit G	100	100	98.51	100	98.63	99.03	98.63	CORE
	433	hypothetical protein	100	100	98.11	99.66	100	99.64	81.4	CORE
	1832	hypothetical protein	100	100	98.07	98.07	98.07	98.41	98.07	CORE
	1749	Transcriptional regulator, MerR family	100	100	97.47	97.47	97.47	94.92	97.47	CORE
	534	hypothetical protein	100	100	97.37	100	100	100	92.68	CORE
	1752	Co/Zn/Cd efflux system component	100	100	97.12	97.12	97.12	97.06	97.12	CORE
	527	Glycolate dehydrogenase (EC 1.1.99.14), FAD-binding subunit GlcE	100	100	97.04	99.13	100	87.16	92.86	CORE
	425	Integration host factor alpha subunit	100	100	95.33	99.07	100	98.92	86.92	CORE
	2794	Type I restriction-modification system, DNA-methyltransferase subunit M (EC 2.1.1.72)	100	100	94.86	94.86	94.86	95.65	94.52	CORE
	1755	Cytochrome b561	100	100	94.42	95.62	94.42	95.62	97.94	CORE
	1739	NADH-ubiquinone oxidoreductase chain B (EC 1.6.5.3)	100	100	94.3	100	100	100	100	CORE
	206	hypothetical protein	100	100	93.71	93.04	93.94	96	93.71	CORE
	2788	protein of unknown function DUF74	100	100	93.1	93.1	93.1	93.1	93.58	CORE
	1727	hypothetical protein	100	100	91.75	100	96.91	91.75	100	CORE
	895	Glutathione S-transferase (EC 2.5.1.18)	100	100	91.47	91.47	93.16	84.42	92.89	CORE
	177	hypothetical protein	100	100	90.84	90.84	90.84	87.1	90.84	CORE
	1728	hypothetical protein	100	100	90.48	100	100	90.48	100	CORE
	1730	hypothetical protein	100	100	90	100	100	100	80.77	CORE
	178	Copper(I) chaperone CopZ	100	100	88.06	88.06	88.06	88.06	88.06	CORE
	2603	FMN-binding negative transcriptional regulator	100	100	84.14	100	84.14	100	100	CORE
	1338	hypothetical protein	100	100	72.5	100	100	100	100	CORE
	287	[Protein-PII] uridylyltransferase (EC 2.7.7.59) / [Protein-PII]-UMP uridylyl-removing enzyme	100	99.88	100	100	99.88	100	100	CORE
	603	LppC putative lipoprotein	100	99.83	100	100	100	100	98.28	CORE
	1378	Efflux transport system, outer membrane factor (OMF) lipoprotein	100	99.77	100	100	100	100	99.76	CORE
	3037	uncharacterized domain / RidA/YER057c/UK114 superfamily, group 5	100	99.71	100	100	99.71	99.32	100	CORE
	556	RuBisCO operon transcriptional regulator CbbR	100	99.7	100	99.71	100	99.14	93.31	CORE
	1967	Aldo/keto reductase	100	99.63	100	100	100	99.17	99.63	CORE
	2586	Cytochrome c oxidase polypeptide II (EC 1.9.3.1)	100	99.61	100	100	100	100	100	CORE
	1892	hypothetical protein	100	99.61	100	100	100	100	100	CORE
	848	DNA polymerase III epsilon subunit (EC 2.7.7.7)	100	99.59	100	100	100	99.06	100	CORE
	940	DNA recombination and repair protein RecO	100	99.59	99.59	100	99.59	100	100	CORE
	2445	Capsular polysaccharide export system protein KpsS	100	99.57	100	100	100	100	100	CORE
	2834	Ca2+/Na+ antiporter	100	99.57	99.7	99.72	100	99.7	98.92	CORE
	2726	[NiFe] hydrogenase nickel incorporation-associated protein HypB	100	99.54	99.54	100	100	100	99.61	CORE
	2396	ABC transporter related	100	99.53	100	100	100	100	100	CORE
	1885	Phosphoesterase, PA-phosphatase related	100	99.5	100	100	99.5	99.15	100	CORE
	522	Transcriptional regulator, Crp/Fnr family	100	99.5	99.5	100	99.5	99.5	88.89	CORE
	1793	NAD(P)H dehydrogenase (quinone), Type IV (EC 1.6.5.2)	100	99.49	100	100	100	100	100	CORE
	1537	Transcriptional regulator, AcrR family	100	99.46	100	100	100	100	100	CORE
	2915	ATP/GTP-binding protein	100	99.44	100	100	100	99.51	99.18	CORE
	2019	Heterodisulfide reductase subunit B like protein HTH_1882	100	99.43	100	100	100	100	95.04	CORE
	2983	Type IV pilus biogenesis protein PilO	100	99.42	100	100	100	94.17	100	CORE
	1165	NLP/P60 protein	100	99.4	99.4	99.4	99.4	100	99.4	CORE
	1349	Transcriptional regulator, MarR family	100	99.31	100	100	99.31	100	100	CORE
	580	Sensory box protein	100	99.31	99.67	99.67	99.67	100	85	CORE
	827	Smr domain protein	100	99.26	100	100	99.26	99.31	97.5	CORE
	2621	Mobile element protein	100	99.24	100	100	100	100	100	CORE
	735	protein-disulfide reductase	100	99.23	100	100	100	100	100	CORE
	1626	ABC transporter, ATP-binding protein	100	99.07	99.07	100	99.07	99.07	99.07	CORE
	1385	Xylulose-5-phosphate phosphoketolase (EC 4.1.2.9) @ Fructose-6-phosphate phosphoketolase (EC 4.1.2.22)	100	99.03	100	100	100	100	100	CORE
	1800	hypothetical protein	100	98.95	100	100	100	100	98.95	CORE
	97	VapC toxin protein	100	98.82	100	100	100	100	100	CORE
	1900	Mobile element protein	100	98.7	99.69	100	100	94.56	99.63	CORE
	1344	conserved hypothetical protein-putative cysteine protease	100	98.6	99.5	100	100	98.14	97.44	CORE
	2371	hypothetical protein	100	98.18	100	100	100	98.18	100	CORE
	1898	hypothetical protein	100	98.18	100	100	100	98.18	100	CORE
	2759	hypothetical protein	100	98.04	98.04	100	100	98.04	98.04	CORE
	949	hypothetical protein	100	97.96	97.96	100	100	97.96	100	CORE
	2370	Mobile element protein	100	96.94	97.39	100	100	99.13	100	CORE
	1899	Mobile element protein	100	96.94	97.39	100	100	99.13	100	CORE
	2606	hypothetical protein	100	95.14	100	100	100	100	97.5	CORE
	2369	Mobile element protein	100	94.56	98.63	100	100	94.56	99.67	CORE
	1897	FIG005080: Possible exported protein	99.92	100	100	100	99.92	99.71	99.78	CORE
	1213	Error-prone repair homolog of DNA polymerase III alpha subunit (EC 2.7.7.7)	99.9	99.9	99.9	100	99.9	100	99.9	CORE
	7	Sigma-fimbriae usher protein	99.88	100	100	100	100	99.88	99.88	CORE
	1548	Ribonuclease E (EC 3.1.26.12)	99.87	99.87	99.87	100	100	100	100	CORE
	102	NADH dehydrogenase (EC 1.6.99.3)	99.86	99.86	100	100	100	100	99.86	CORE
	114	RND efflux system, inner membrane transporter	99.86	99.86	99.86	100	99.86	100	100	CORE
	2632	Type III restriction-modification system StyLTI enzyme mod (EC 2.1.1.72); Type III restriction-modification system methylation subunit (EC 2.1.1.72)	99.84	99.84	100	100	100	100	100	CORE
	672	Cell division protein FtsI [Peptidoglycan synthetase] (EC 2.4.1.129)	99.82	100	100	100	100	100	100	CORE
	1624	TonB-dependent receptor	99.82	99.82	100	100	100	99.72	100	CORE
	2635	hypothetical protein	99.82	99.82	99.82	100	100	97.55	99.82	CORE
	215	CTP synthase (EC 6.3.4.2)	99.81	100	99.81	100	100	100	100	CORE
	2406	hypothetical protein	99.81	99.81	100	100	99.8	100	99.8	CORE
	310	Bis-ABC ATPase YbiT	99.81	99.81	99.81	100	100	99.81	100	CORE
	3033	Gamma-glutamyltranspeptidase (EC 2.3.2.2) @ Glutathione hydrolase (EC 3.4.19.13)	99.81	99.81	99.81	100	99.81	99.79	99.81	CORE
	830	DNA translocase FtsK	99.81	99.81	99.81	100	99.81	99.81	98.31	CORE
	552	Carboxysome shell protein CsoS3	99.81	99.81	99.81	99.62	99.81	99.55	96.65	CORE
	3052	GH3 auxin-responsive promoter	99.8	99.8	99.8	100	99.8	99.75	100	CORE
	2009	hypothetical protein	99.8	99.8	99.8	99.8	99.8	99.56	98.68	CORE
	2393	Mannose-1-phosphate guanylyltransferase (EC 2.7.7.13) / Mannose-6-phosphate isomerase (EC 5.3.1.8)	99.79	99.79	99.79	100	99.79	99.44	99.79	CORE
	29	sigma-54 dependent DNA-binding response regulator	99.79	99.79	99.79	99.79	99.79	99.43	99.76	CORE
	2688	Pyruvate kinase (EC 2.7.1.40)	99.79	99.58	100	100	100	99.66	100	CORE
	119	protein of unknown function DUF306, Meta and HslJ	99.78	99.78	99.78	100	99.78	100	99.78	CORE
	2126	Efflux transport system, outer membrane factor (OMF) lipoprotein	99.78	99.38	99.38	99.85	99.38	99.35	100	CORE
	2136	Type II/IV secretion system ATP hydrolase TadA/VirB11/CpaF, TadA subfamily	99.77	99.77	100	100	99.77	100	100	CORE
	2268	Glucose-1-phosphate adenylyltransferase (EC 2.7.7.27)	99.77	99.77	99.54	99.54	99.54	100	99.77	CORE
	22	16S rRNA (cytosine(967)-C(5))-methyltransferase (EC 2.1.1.176)	99.76	100	100	100	99.76	100	100	CORE
	1000	tRNA(Ile)-lysidine synthetase (EC 6.3.4.19)	99.76	99.76	99.77	100	100	86.71	98	CORE
	1288	Heavy metal RND efflux outer membrane protein, CzcC family	99.75	100	99.75	100	100	99.55	89.87	CORE
	1500	glycoside hydrolase	99.75	99.78	99.78	100	99.78	99.74	99.37	CORE
	268	3-phosphoshikimate 1-carboxyvinyltransferase (EC 2.5.1.19)	99.75	99.75	99.75	100	99.75	100	100	CORE
	1261	Ammonium transporter	99.75	99.75	99.75	100	99.75	99.67	100	CORE
	2689	Phosphoglycerate kinase (EC 2.7.2.3)	99.75	99.75	99.5	99.5	99.5	91.56	96.77	CORE
	1979	biotin/lipoate A/B protein ligase	99.71	100	99.71	100	99.71	100	98.51	CORE
	991	UDP-3-O-[3-hydroxymyristoyl] glucosamine N-acyltransferase (EC 2.3.1.191)	99.71	99.71	100	100	99.71	99.64	99.64	CORE
	1455	Glycerol-3-phosphate dehydrogenase [NAD(P)+] (EC 1.1.1.94)	99.71	99.71	100	100	99.71	99.65	98.68	CORE
	2466	Phosphotransferase involved in threonylcarbamoyladenosine t(6)A37 formation in tRNA	99.7	100	100	100	100	100	99.6	CORE
	1255	DNA polymerase III delta prime subunit (EC 2.7.7.7)	99.68	100	99.68	99.68	100	100	99.68	CORE
	1036	ABC transporter, substrate-binding protein (cluster 1, maltose/g3p/polyamine/iron)	99.67	99.67	99.67	100	99.67	99.6	99.67	CORE
	2846	Magnesium and cobalt efflux protein CorC	99.66	99.66	100	99.66	100	100	100	CORE
	2955	Rieske (2Fe-2S) domain protein	99.66	99.66	99.66	100	99.66	100	99.66	CORE
	681	UDP-3-O-[3-hydroxymyristoyl] N-acetylglucosamine deacetylase (EC 3.5.1.108)	99.65	99.65	99.65	100	100	100	100	CORE
	807	DNA-directed RNA polymerase alpha subunit (EC 2.7.7.6)	99.64	100	100	100	100	99.25	100	CORE
	1442	Outer-membrane-phospholipid-binding lipoprotein MlaA	99.63	100	99.63	100	99.63	99.36	95.8	CORE
	1515	Prolipoprotein diacylglyceryl transferase	99.63	99.63	100	100	100	100	100	CORE
	147	Retron-type RNA-directed DNA polymerase (EC 2.7.7.49)	99.62	100	97.52	97.52	97.52	96.91	96.91	CORE
	2937	Sulfur carrier protein FdhD	99.62	99.62	99.62	100	100	99.62	99.62	CORE
	1311	GTP cyclohydrolase I (EC 3.5.4.16) type 2	99.61	99.61	100	99.61	100	98.89	97.73	CORE
	2531	DnaJ-class molecular chaperone CbpA	99.59	100	100	100	100	100	99.68	CORE
	2372	TonB-dependent receptor	99.59	99.59	99.59	99.59	99.59	99.59	98.11	CORE
	637	Exodeoxyribonuclease III (EC 3.1.11.2)	99.58	100	99.58	100	99.58	99.39	99.28	CORE
	983	Uridine monophosphate kinase (EC 2.7.4.22)	99.58	99.58	99.58	99.58	100	100	100	CORE
	223	Transcriptional regulator, Crp/Fnr family	99.58	99.58	99.58	99.58	99.58	99.24	99.58	CORE
	823	2-C-methyl-D-erythritol 4-phosphate cytidylyltransferase (EC 2.7.7.60)	99.57	100	100	100	100	98.98	99.57	CORE
	14	Septum site-determining protein MinC	99.56	99.56	99.56	100	99.56	99.56	100	CORE
	2771	COG1355, Predicted dioxygenase	99.54	99.54	100	100	100	100	98.63	CORE
	1820	Protein of unknown function DUF374	99.54	99.54	99.54	100	100	99.56	100	CORE
	2404	Sulfate adenylyltransferase subunit 1 (EC 2.7.7.4) / Adenylylsulfate kinase (EC 2.7.1.25)	99.51	99.51	99.51	99.83	99.51	100	99.51	CORE
	3050	FIG017861: hypothetical protein	99.48	99.48	100	100	100	100	100	CORE
	2252	hypothetical protein	99.48	99.48	99.48	100	99.48	99.48	99.48	CORE
	2496	UPF0301 protein YqgE	99.46	99.46	99.46	99.46	99.46	99.42	99.46	CORE
	61	Crossover junction endodeoxyribonuclease RuvC (EC 3.1.22.4)	99.45	99.45	99.45	100	99.45	100	99.45	CORE
	2923	Chaperone protein HscB	99.45	99.45	99.45	99.45	100	99.45	100	CORE
	2657	Molybdenum cofactor biosynthesis protein MoaB	99.44	100	100	100	100	97.46	99.44	CORE
	1386	Putative salt-induced outer membrane protein-like protein	99.43	99.52	99.52	99.43	99.43	99.43	99.52	CORE
	2368	Mobile element protein	99.42	98.7	99.42	100	99.42	94.29	99.42	CORE
	1751	ATP synthase epsilon chain (EC 3.6.3.14)	99.39	99.39	100	100	100	100	96.93	CORE
	817	Hypoxanthine-guanine phosphoribosyltransferase (EC 2.4.2.8)	99.39	99.39	99.39	100	100	95	100	CORE
	733	N5-carboxyaminoimidazole ribonucleotide mutase (EC 5.4.99.18)	99.38	100	99.38	100	100	100	100	CORE
	2150	Acetyltransferase, GNAT family	99.37	99.37	99.37	100	99.37	99.37	99.37	CORE
	1748	Cobalt-zinc-cadmium resistance protein CzcD	99.37	99.37	96.1	96.1	96.1	97.62	86.81	CORE
	953	FIG001353: Acetyltransferase	99.34	100	100	100	100	100	100	CORE
	520	oxidoreductase FAD/NAD(P)-binding domain protein	99.34	100	100	99.71	100	100	96.12	CORE
	2464	hypothetical protein	99.31	99.27	99.27	100	99.31	100	99.31	CORE
	521	Hydroxylamine reductase (EC 1.7.99.1)	99.27	100	99.82	100	100	100	98.53	CORE
	3071	Uncharacterized protein BT3327	99.25	99.25	99.25	100	99.24	99.25	99.81	CORE
	2757	hypothetical protein	99.22	99.22	99.22	99.22	99.22	100	99.22	CORE
	2232	Methylated-DNA--protein-cysteine methyltransferase (EC 2.1.1.63)	99.22	99.22	99.22	99.22	99.22	82	99.22	CORE
	1208	hypothetical protein	99.19	99.06	99.06	99.06	98.67	100	99.06	CORE
	1928	hypothetical protein	99.16	99.16	100	100	99.16	100	100	CORE
	764	hypothetical protein	99.15	100	99.15	99.21	100	99.15	99.15	CORE
	2546	hypothetical protein	99.12	100	99.12	100	100	99.12	99.15	CORE
	2031	hypothetical protein	99.12	100	99.12	100	100	99.12	99.15	CORE
	142	Mobile element protein	99.09	100	96.55	99.09	99.09	99.01	98.6	CORE
	577	Sensory box protein	99.08	99.08	99.08	99.08	99.08	99.18	85.19	CORE
	937	hypothetical protein	99	99	99	100	99	96.77	100	CORE
	281	Peptidyl-prolyl cis-trans isomerase PpiD (EC 5.2.1.8)	98.95	98.99	98.99	100	98.95	96.63	94.38	CORE
	237	YoeB toxin protein	98.85	100	98.85	98.85	98.8	100	98.8	CORE
	2383	23S rRNA (pseudouridine(1915)-N(3))-methyltransferase (EC 2.1.1.177)	98.8	100	100	100	100	100	100	CORE
	2319	transcriptional regulator/antitoxin, MazE	98.57	98.57	98.57	98.57	100	100	98.57	CORE
	1753	hypothetical protein	98.53	98.53	94.19	94.19	93.15	91.86	94.52	CORE
	968	Transcriptional regulator, MerR family	98.51	100	100	100	100	98.51	100	CORE
	3073	restriction modification system DNA specificity domain	98.47	98.47	98.4	100	98.47	93.81	93.81	CORE
	2837	Cold shock protein of CSP family	98.39	98.39	98.39	100	98.39	98.39	98.39	CORE
	3077	Integrase/recombinase, RitB	98.36	100	99.62	100	100	99.53	100	CORE
	1855	Integrase/recombinase, RitB	98.36	100	99.62	100	100	99.53	100	CORE
	1724	Integrase/recombinase, RitB	98.36	100	99.62	100	100	99.53	100	CORE
	2500	hypothetical protein	98.21	100	98.21	98.21	100	98.21	97.67	CORE
	2706	hypothetical protein	98.15	100	100	100	100	100	100	CORE
	3069	hypothetical protein	97.87	97.87	100	100	97.87	97.37	97.87	CORE
	1757	Cobalt-zinc-cadmium resistance protein CzcA; Cation efflux system protein CusA	97.77	97.78	97.1	97.2	97.18	96.19	95.33	CORE
	2551	hypothetical protein	97.73	97.73	97.73	97.73	97.73	97.73	97.73	CORE
	184	Heavy metal transport/detoxification protein	97.56	97.56	82.93	82.93	82.93	82.93	82.93	CORE
	1605	MotA/TolQ/ExbB proton channel	97.39	97.39	97.39	97.39	97.39	97.5	82.97	CORE
	863	hypothetical protein	97.37	97.37	97.37	97.37	97.37	100	97.37	CORE
	2086	hypothetical protein	97.3	100	100	97.3	100	97.3	100	CORE
	2604	conserved hypothetical protein-putative cysteine protease	97.21	99.3	98.6	100	98.6	99.07	97.44	CORE
	2240	conserved hypothetical protein-putative cysteine protease	97.21	97.2	100	100	100	99.07	97.44	CORE
	1822	Heavy metal RND efflux outer membrane protein, CzcC family	97.06	97.06	99.44	99.51	99.51	99.51	98.74	CORE
	574	Mobile element protein	97	97.11	97	96.48	97	95.45	96.48	CORE
	1568	Nitrogen regulatory protein P-II, GlnK	96.97	96.97	99.24	99.24	99.24	99.24	99.09	CORE
	1828	hypothetical protein	96.95	96.95	93.89	93.89	93.89	93.55	93.89	CORE
	1915	Mercuric ion reductase (EC 1.16.1.1)	96.34	96.34	96.16	96.34	96.16	97.81	96.34	CORE
	1731	hypothetical protein	94.68	94.68	94.68	100	94.68	100	100	CORE
	1761	Heavy metal RND efflux outer membrane protein, CzcC family	93.46	93.46	98.1	99.07	99.07	99.07	99.07	CORE
	2218	hypothetical protein	93.03	93.03	93.03	93.03	93.03	90.79	98.51	CORE
	1829	Copper(I) chaperone CopZ	92.54	92.54	95.59	95.59	95.59	95.59	95.59	CORE
	1743	hypothetical protein	92.5	92.5	92.41	92.5	92.5	92.5	92.5	CORE
	2230	Transcriptional regulator, ArsR family	92.48	92.48	93.75	92.48	92.48	93.75	89.74	CORE
	1721	Retron-type RNA-directed DNA polymerase (EC 2.7.7.49)	91.72	96.36	91.72	91.72	91.72	91.72	91.72	CORE
	1340	Efflux ABC transporter, ATP-binding protein	90.14	90.14	90.14	100	90.14	100	100	CORE
	2231	hypothetical protein	88.97	88.97	88.97	88.97	88.97	88.71	84.51	CORE
	1741	Mobile element protein	87.73	87.73	85.91	87.73	87.73	90.1	86.92	CORE
	2513	hypothetical protein	85.71	85.71	100	100	100	100	100	CORE
	434	Phospholipid/glycerol acyltransferase	80.6	80.6	98.86	81.25	83.1	92	87.32	CORE
	161	hypothetical protein	0	0	0	0	0	0	0	EXCLUSIVE
	163	hypothetical protein	0	0	0	0	0	0	0	EXCLUSIVE
	165	hypothetical protein	0	0	0	0	0	0	0	EXCLUSIVE
	167	hypothetical protein	0	0	0	0	0	0	0	EXCLUSIVE
	168	hypothetical protein	0	0	0	0	0	0	0	EXCLUSIVE
	185	hypothetical protein	0	0	0	0	0	0	0	EXCLUSIVE
	187	hypothetical protein	0	0	0	0	0	0	0	EXCLUSIVE
	202	hypothetical protein	0	0	0	0	0	0	0	EXCLUSIVE
	203	hypothetical protein	0	0	0	0	0	0	0	EXCLUSIVE
	207	hypothetical protein	0	0	0	0	0	0	0	EXCLUSIVE
	208	Mobile element protein	0	0	0	0	0	0	0	EXCLUSIVE
	210	hypothetical protein	0	0	0	0	0	0	0	EXCLUSIVE
	279	hypothetical protein	0	0	0	0	0	0	0	EXCLUSIVE
	358	hypothetical protein	0	0	0	0	0	0	0	EXCLUSIVE
	361	hypothetical protein	0	0	0	0	0	0	0	EXCLUSIVE
	366	hypothetical protein	0	0	0	0	0	0	0	EXCLUSIVE
	403	hypothetical protein	0	0	0	0	0	0	0	EXCLUSIVE
	417	hypothetical protein	0	0	0	0	0	0	0	EXCLUSIVE
	445	hypothetical protein	0	0	0	0	0	0	0	EXCLUSIVE
	458	hypothetical protein	0	0	0	0	0	0	0	EXCLUSIVE
	460	hypothetical protein	0	0	0	0	0	0	0	EXCLUSIVE
	462	hypothetical protein	0	0	0	0	0	0	0	EXCLUSIVE
	463	hypothetical protein	0	0	0	0	0	0	0	EXCLUSIVE
	560	hypothetical protein	0	0	0	0	0	0	0	EXCLUSIVE
	579	Transposase and inactivated derivatives	0	0	0	0	0	0	0	EXCLUSIVE
	594	hypothetical protein	0	0	0	0	0	0	0	EXCLUSIVE
	612	hypothetical protein	0	0	0	0	0	0	0	EXCLUSIVE
	894	hypothetical protein	0	0	0	0	0	0	0	EXCLUSIVE
	906	hypothetical protein	0	0	0	0	0	0	0	EXCLUSIVE
	913	hypothetical protein	0	0	0	0	0	0	0	EXCLUSIVE
	1113	hypothetical protein	0	0	0	0	0	0	0	EXCLUSIVE
	1121	hypothetical protein	0	0	0	0	0	0	0	EXCLUSIVE
	1173	hypothetical protein	0	0	0	0	0	0	0	EXCLUSIVE
	1493	hypothetical protein	0	0	0	0	0	0	0	EXCLUSIVE
	1596	hypothetical protein	0	0	0	0	0	0	0	EXCLUSIVE
	1759	Cobalt/zinc/cadmium efflux RND transporter, membrane fusion protein, CzcB family	0	0	0	0	0	0	0	EXCLUSIVE
	1824	Lead, cadmium, zinc and mercury transporting ATPase (EC 3.6.3.3) (EC 3.6.3.5); Copper-translocating P-type ATPase (EC 3.6.3.4)	0	0	0	0	0	0	0	EXCLUSIVE
	1825	Lead, cadmium, zinc and mercury transporting ATPase (EC 3.6.3.3) (EC 3.6.3.5); Copper-translocating P-type ATPase (EC 3.6.3.4)	0	0	0	0	0	0	0	EXCLUSIVE
	1826	Lead, cadmium, zinc and mercury transporting ATPase (EC 3.6.3.3) (EC 3.6.3.5); Copper-translocating P-type ATPase (EC 3.6.3.4)	0	0	0	0	0	0	0	EXCLUSIVE
	1830	Na+/H+ antiporter	0	0	0	0	0	0	0	EXCLUSIVE
	2035	hypothetical protein	0	0	0	0	0	0	0	EXCLUSIVE
	2142	hypothetical protein	0	0	0	0	0	0	0	EXCLUSIVE
	2302	hypothetical protein	0	0	0	0	0	0	0	EXCLUSIVE
	2397	hypothetical protein	0	0	0	0	0	0	0	EXCLUSIVE
	2429	hypothetical protein	0	0	0	0	0	0	0	EXCLUSIVE
	2441	hypothetical protein	0	0	0	0	0	0	0	EXCLUSIVE
	2505	hypothetical protein	0	0	0	0	0	0	0	EXCLUSIVE
	2567	hypothetical protein	0	0	0	0	0	0	0	EXCLUSIVE
	2569	hypothetical protein	0	0	0	0	0	0	0	EXCLUSIVE
	2708	hypothetical protein	0	0	0	0	0	0	0	EXCLUSIVE
	2746	hypothetical protein	0	0	0	0	0	0	0	EXCLUSIVE
	2789	hypothetical protein	0	0	0	0	0	0	0	EXCLUSIVE
	2791	hypothetical protein	0	0	0	0	0	0	0	EXCLUSIVE
	2797	hypothetical protein	0	0	0	0	0	0	0	EXCLUSIVE
	2827	hypothetical protein	0	0	0	0	0	0	0	EXCLUSIVE
	2831	hypothetical protein	0	0	0	0	0	0	0	EXCLUSIVE
	3012	hypothetical protein	0	0	0	0	0	0	0	EXCLUSIVE
	144	hypothetical protein	100	0	0	0	0	0	0	PARTIAL
	1622	hypothetical protein	0	100	0	0	0	0	0	PARTIAL
	172	Mobile element protein	99.14	99.14	0	0	0	0	0	PARTIAL
	139	putative ATP-dependent protease	100	100	0	0	0	0	0	PARTIAL
	162	hypothetical protein	100	100	0	0	0	0	0	PARTIAL
	164	hypothetical protein	100	100	0	0	0	0	0	PARTIAL
	169	hypothetical protein	100	100	0	0	0	0	0	PARTIAL
	192	hypothetical protein	100	100	0	0	0	0	0	PARTIAL
	193	hypothetical protein	100	100	0	0	0	0	0	PARTIAL
	367	hypothetical protein	100	100	0	0	0	0	0	PARTIAL
	368	hypothetical protein	100	100	0	0	0	0	0	PARTIAL
	379	hypothetical protein	100	100	0	0	0	0	0	PARTIAL
	387	hypothetical protein	100	100	0	0	0	0	0	PARTIAL
	388	hypothetical protein	100	100	0	0	0	0	0	PARTIAL
	389	hypothetical protein	100	100	0	0	0	0	0	PARTIAL
	390	hypothetical protein	100	100	0	0	0	0	0	PARTIAL
	391	hypothetical protein	100	100	0	0	0	0	0	PARTIAL
	394	hypothetical protein	100	100	0	0	0	0	0	PARTIAL
	395	hypothetical protein	100	100	0	0	0	0	0	PARTIAL
	396	hypothetical protein	100	100	0	0	0	0	0	PARTIAL
	398	hypothetical protein	100	100	0	0	0	0	0	PARTIAL
	404	hypothetical protein	100	100	0	0	0	0	0	PARTIAL
	406	hypothetical protein	100	100	0	0	0	0	0	PARTIAL
	896	RecD-like DNA helicase YrrC	100	100	0	0	0	0	0	PARTIAL
	921	hypothetical protein	100	100	0	0	0	0	0	PARTIAL
	2787	hypothetical protein	100	100	0	0	0	0	0	PARTIAL
	2793	hypothetical protein	100	100	0	0	0	0	0	PARTIAL
	2798	hypothetical protein	100	100	0	0	0	0	0	PARTIAL
	2800	hypothetical protein	100	100	0	0	0	0	0	PARTIAL
	2802	hypothetical protein	100	100	0	0	0	0	0	PARTIAL
	2803	hypothetical protein	100	100	0	0	0	0	0	PARTIAL
	2807	hypothetical protein	100	100	0	0	0	0	0	PARTIAL
	2808	hypothetical protein	100	100	0	0	0	0	0	PARTIAL
	2809	hypothetical protein	100	100	0	0	0	0	0	PARTIAL
	2817	hypothetical protein	100	100	0	0	0	0	0	PARTIAL
	2828	hypothetical protein	100	100	0	0	0	0	0	PARTIAL
	173	Mobile element protein	99.23	100	0	0	0	0	0	PARTIAL
	1018	hypothetical protein	0	0	97.44	0	0	0	0	PARTIAL
	444	hypothetical protein	0	0	99.81	0	0	0	0	PARTIAL
	1536	hypothetical protein	0	100	100	0	0	0	0	PARTIAL
	2812	hypothetical protein	100	100	92.22	0	0	0	0	PARTIAL
	903	hypothetical protein	100	100	99.48	0	0	0	0	PARTIAL
	416	hypothetical protein	100	100	100	0	0	0	0	PARTIAL
	418	FIG00641392: hypothetical protein	100	100	100	0	0	0	0	PARTIAL
	420	hypothetical protein	100	100	100	0	0	0	0	PARTIAL
	422	hypothetical protein	100	100	100	0	0	0	0	PARTIAL
	688	hypothetical protein	100	100	100	0	0	0	0	PARTIAL
	902	hypothetical protein	100	100	100	0	0	0	0	PARTIAL
	1197	hypothetical protein	100	100	100	0	0	0	0	PARTIAL
	2815	hypothetical protein	100	100	43.33	0	0	0	0	PARTIAL
	2805	hypothetical protein	100	100	52.46	0	0	0	0	PARTIAL
	508	hypothetical protein	0	0	0	96.61	0	0	0	PARTIAL
	2104	hypothetical protein	0	0	0	97.3	0	0	0	PARTIAL
	1604	hypothetical protein	0	0	0	97.87	0	0	0	PARTIAL
	1429	hypothetical protein	0	0	0	99.07	0	0	0	PARTIAL
	497	hypothetical protein	0	0	0	99.62	0	0	0	PARTIAL
	73	hypothetical protein	0	0	0	100	0	0	0	PARTIAL
	78	hypothetical protein	0	0	0	100	0	0	0	PARTIAL
	122	hypothetical protein	0	0	0	100	0	0	0	PARTIAL
	236	YefM protein (antitoxin to YoeB)	0	0	0	100	0	0	0	PARTIAL
	245	hypothetical protein	0	0	0	100	0	0	0	PARTIAL
	258	hypothetical protein	0	0	0	100	0	0	0	PARTIAL
	315	hypothetical protein	0	0	0	100	0	0	0	PARTIAL
	512	hypothetical protein	0	0	0	100	0	0	0	PARTIAL
	538	hypothetical protein	0	0	0	100	0	0	0	PARTIAL
	543	hypothetical protein	0	0	0	100	0	0	0	PARTIAL
	570	hypothetical protein	0	0	0	100	0	0	0	PARTIAL
	605	hypothetical protein	0	0	0	100	0	0	0	PARTIAL
	829	hypothetical protein	0	0	0	100	0	0	0	PARTIAL
	1177	hypothetical protein	0	0	0	100	0	0	0	PARTIAL
	1201	hypothetical protein	0	0	0	100	0	0	0	PARTIAL
	1203	hypothetical protein	0	0	0	100	0	0	0	PARTIAL
	1282	hypothetical protein	0	0	0	100	0	0	0	PARTIAL
	1321	hypothetical protein	0	0	0	100	0	0	0	PARTIAL
	1422	hypothetical protein	0	0	0	100	0	0	0	PARTIAL
	1426	hypothetical protein	0	0	0	100	0	0	0	PARTIAL
	1428	hypothetical protein	0	0	0	100	0	0	0	PARTIAL
	1436	hypothetical protein	0	0	0	100	0	0	0	PARTIAL
	1437	hypothetical protein	0	0	0	100	0	0	0	PARTIAL
	1491	hypothetical protein	0	0	0	100	0	0	0	PARTIAL
	1511	hypothetical protein	0	0	0	100	0	0	0	PARTIAL
	1560	hypothetical protein	0	0	0	100	0	0	0	PARTIAL
	1577	hypothetical protein	0	0	0	100	0	0	0	PARTIAL
	1584	hypothetical protein	0	0	0	100	0	0	0	PARTIAL
	1650	hypothetical protein	0	0	0	100	0	0	0	PARTIAL
	1738	hypothetical protein	0	0	0	100	0	0	0	PARTIAL
	1745	hypothetical protein	0	0	0	100	0	0	0	PARTIAL
	1849	hypothetical protein	0	0	0	100	0	0	0	PARTIAL
	1909	hypothetical protein	0	0	0	100	0	0	0	PARTIAL
	1911	hypothetical protein	0	0	0	100	0	0	0	PARTIAL
	1929	hypothetical protein	0	0	0	100	0	0	0	PARTIAL
	1946	hypothetical protein	0	0	0	100	0	0	0	PARTIAL
	2040	hypothetical protein	0	0	0	100	0	0	0	PARTIAL
	2080	hypothetical protein	0	0	0	100	0	0	0	PARTIAL
	2081	hypothetical protein	0	0	0	100	0	0	0	PARTIAL
	2084	Copper resistance protein CopC	0	0	0	100	0	0	0	PARTIAL
	2088	hypothetical protein	0	0	0	100	0	0	0	PARTIAL
	2092	hypothetical protein	0	0	0	100	0	0	0	PARTIAL
	2149	hypothetical protein	0	0	0	100	0	0	0	PARTIAL
	2199	hypothetical protein	0	0	0	100	0	0	0	PARTIAL
	2210	hypothetical protein	0	0	0	100	0	0	0	PARTIAL
	2301	hypothetical protein	0	0	0	100	0	0	0	PARTIAL
	2304	hypothetical protein	0	0	0	100	0	0	0	PARTIAL
	2305	hypothetical protein	0	0	0	100	0	0	0	PARTIAL
	2317	hypothetical protein	0	0	0	100	0	0	0	PARTIAL
	2402	hypothetical protein	0	0	0	100	0	0	0	PARTIAL
	2434	hypothetical protein	0	0	0	100	0	0	0	PARTIAL
	2564	hypothetical protein	0	0	0	100	0	0	0	PARTIAL
	2571	hypothetical protein	0	0	0	100	0	0	0	PARTIAL
	2583	Cytochrome c oxidase polypeptide IV (EC 1.9.3.1)	0	0	0	100	0	0	0	PARTIAL
	2592	hypothetical protein	0	0	0	100	0	0	0	PARTIAL
	2624	hypothetical protein	0	0	0	100	0	0	0	PARTIAL
	2628	hypothetical protein	0	0	0	100	0	0	0	PARTIAL
	2709	hypothetical protein	0	0	0	100	0	0	0	PARTIAL
	2710	hypothetical protein	0	0	0	100	0	0	0	PARTIAL
	2749	FIG005080: Possible exported protein	0	0	0	100	0	0	0	PARTIAL
	2780	hypothetical protein	0	0	0	100	0	0	0	PARTIAL
	2824	hypothetical protein	0	0	0	100	0	0	0	PARTIAL
	2929	hypothetical protein	0	0	0	100	0	0	0	PARTIAL
	2971	hypothetical protein	0	0	0	100	0	0	0	PARTIAL
	3000	hypothetical protein	0	0	0	100	0	0	0	PARTIAL
	2795	hypothetical protein	0	0	0	37.08	0	0	0	PARTIAL
	1301	hypothetical protein	0	0	0	37.7	0	0	0	PARTIAL
	485	hypothetical protein	100	0	0	100	0	0	0	PARTIAL
	2308	hypothetical protein	100	100	0	100	0	0	0	PARTIAL
	2224	hypothetical protein	0	0	29.01	100	0	0	0	PARTIAL
	676	hypothetical protein	100	0	100	100	0	0	0	PARTIAL
	1936	hypothetical protein	100	0	100	100	0	0	0	PARTIAL
	571	hypothetical protein	98.04	98.51	98.04	98.17	0	0	0	PARTIAL
	1167	hypothetical protein	100	100	0	100	0	0	0	PARTIAL
	2374	hypothetical protein	100	100	100	100	0	0	0	PARTIAL
	2747	hypothetical protein	100	100	100	100	0	0	0	PARTIAL
	440	hypothetical protein	99.17	99.17	99.17	40.43	0	0	0	PARTIAL
	461	hypothetical protein	0	0	0	0	100	0	0	PARTIAL
	1206	hypothetical protein	0	0	0	0	100	0	0	PARTIAL
	1373	hypothetical protein	0	0	0	0	100	0	0	PARTIAL
	484	hypothetical protein	0	0	100	0	100	0	0	PARTIAL
	370	Mg(2+)-transport-ATPase-associated protein MgtC	100	100	96.17	0	74.01	0	0	PARTIAL
	374	Nodulin-related protein CC_0717	100	100	93.21	78.95	78.95	0	0	PARTIAL
	562	hypothetical protein	0	0	0	94.12	100	0	0	PARTIAL
	1245	LSU ribosomal protein L32p @ LSU ribosomal protein L32p, zinc-dependent	0	0	0	100	100	0	0	PARTIAL
	1659	hypothetical protein	0	0	0	100	100	0	0	PARTIAL
[truncated: 1,088 more rows]
